# Supplementary material for: miR-30e-5p and miR-15a Synergistically Regulate Fatty Acid Metabolism in Goat Mammary Epithelial Cells via LRP6 and YAP1
Source: MDPI journal article supplement (doi:10.3390/ijms17111909), 2016-11-16
Supplement: s1 [file s1]

# Supplementary Materials: miR-30e-5p and miR-15a Synergistically Regulate Fatty Acid Metabolism in Goat Mammary Epithelial Cells via *LRP6* and *YAP1*

Zhi Chen, Huiling Qiu, Liuan Ma, Jun Luo, Shuang Sun, Kang Kang, Deming Gou and Juan J. Lóor

**S1: Primers are used for first screening. Screening of miRNAs involves in the peak-lactation and non-lactation.**

Capra hircus primary miRNAs, Bos taurus primary miRNAs from miRBase and overlapping data. The samples are mixture of three goats (at the same period) in peak-lactation and non-lactation, respectively. The expression of 18 s rRNA is used as a normalization control.

**S2: Primers are used for 2.5 µg/mL prolactin treatment screening.**

NC and 2.5 µg/mL experimental concentrations in GMECs are used by S-Poly (T) real-time RT-PCR method to detect. The expression of 18 s rRNA is used as a normalization control.

**S3: Primers are used for relative mRNA expression in RT-qPCR assay.**

Genes are clustered based on main function relative to milk fat synthesis. GMECs are transfected with mimic or inhibitor for 48 h, the mRNA expression of *PPARγ*, *LPL*, *CD36*, *DGAT1*, *HSL*, *SCD1*, *FASN* is quantified by RT-qPCR. The expression of *UXT* is used as a normalization control.

**S4: Primers are used for relative SiRNA-*LRP6*, SiRNA-*YAP1* and SiRNA- $\beta$ -casein.**

**S5: Primers are used for segment sequence of wild type, and sequence of mutant type is established by PCR technology of overlap.**

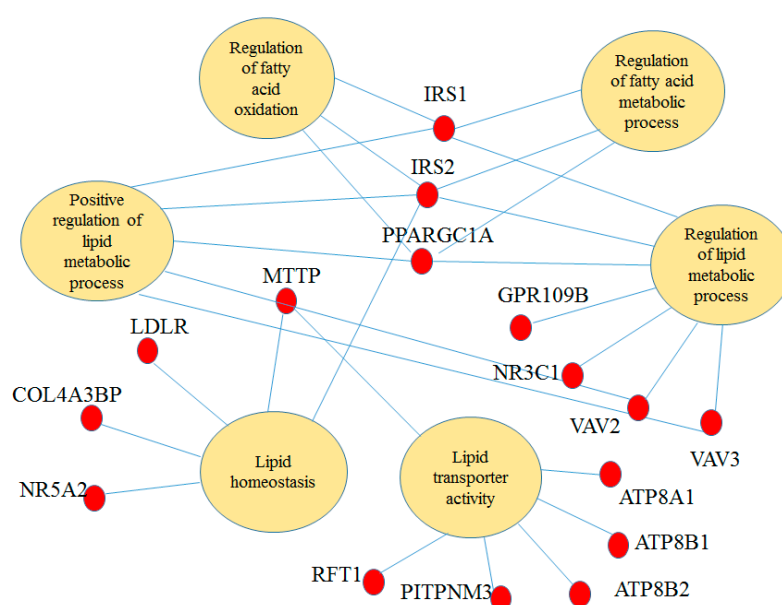

**Figure S1.** Predicted miR-30e-5p target genes are associated with fat metabolism. All experiments are duplicated and repeated three times.

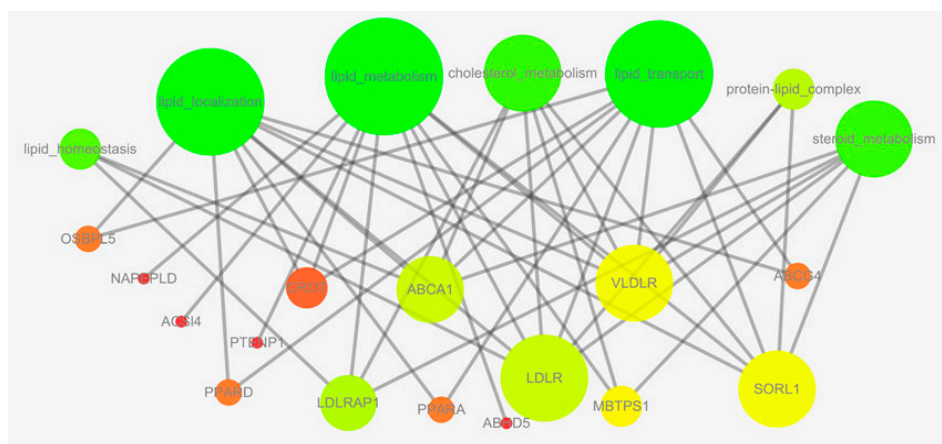

**Figure S2.** Predicted miR-15a target genes are associated with fat metabolism. All experiments are duplicated and repeated three times.

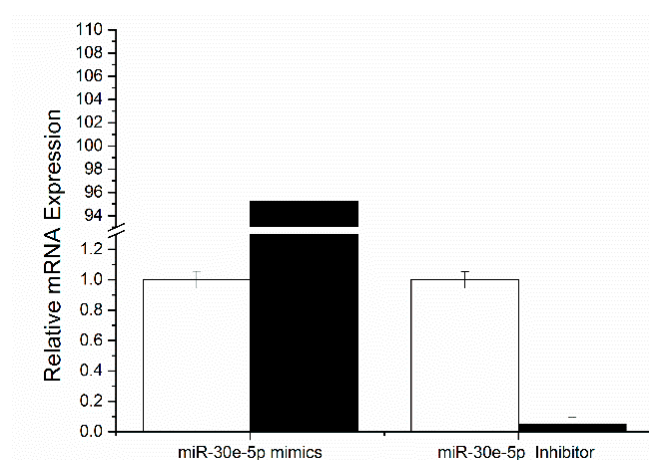

**Figure S3.** Transfection efficiency of miR-30e-5p mimic and inhibitor. GMECs are transfected with miR-30e-5p mimic or inhibitor for 48 h, and miR-30e-5p expression level is quantified by RT-qPCR ( $n = 6$ ). White bars represent negative control; black bars represent miR-30e-5p mimic or inhibitor.

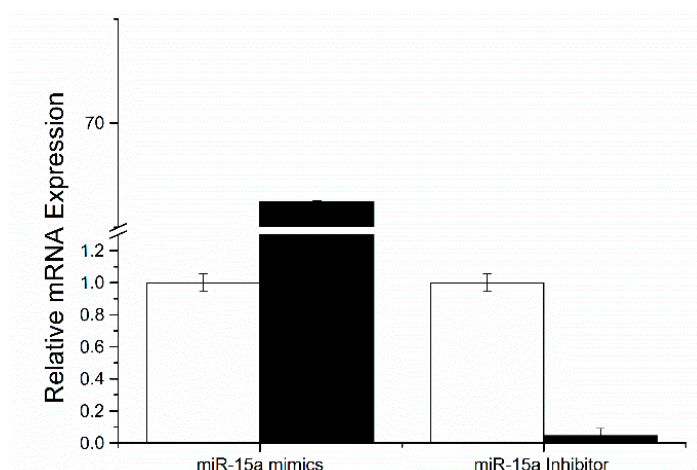

**Figure S4.** Transfection efficiency of miR-15a mimic and inhibitor. GMECs are transfected with miR-15a mimic or inhibitor for 48 h, and miR-15a expression level is quantified by RT-qPCR ( $n = 6$ ). White bars represent negative control; black bars represent miR-15a mimic or inhibitor.

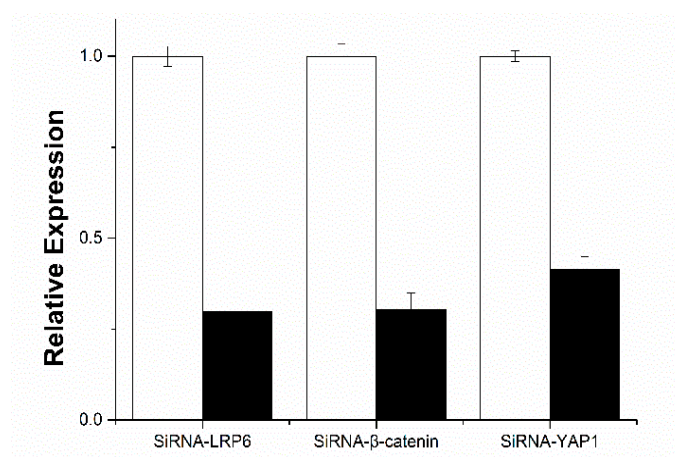

**Figure S5.** Transfection efficiency of SiRNA. GMECs are transfected with SiRNA-*LRP6*, SiRNA-*YAP1* and SiRNA-*β-casein* for 48 h, and Si-NC (60 nM), SiRNA-*LRP6* (60 nM), SiRNA-*YAP1* (60 nM) and SiRNA-*β-casein* (60 nM) expression levels are quantified by RT-qPCR ( $n = 6$ ). White bars represent negative control; black bars represent SiRNA.

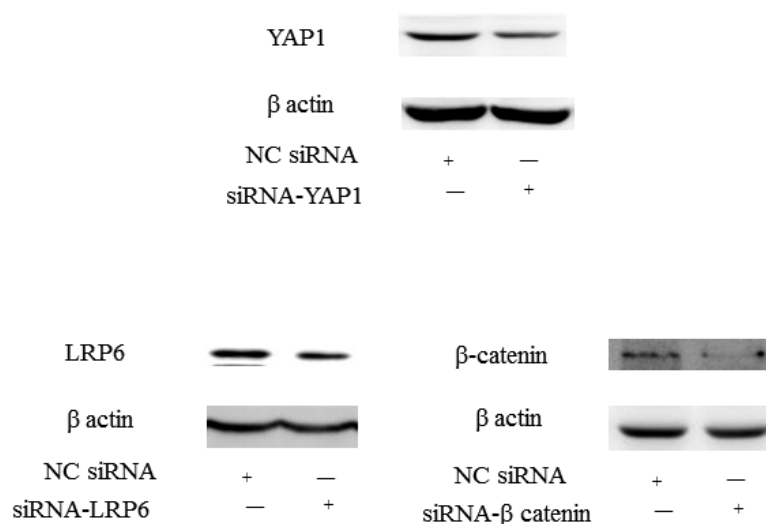

**Figure S6.** Transfection efficiency of SiRNA. Western blot analyses the expression of *β-casein* in the Si-NC (60 nM), SiRNA-*LRP6* (60 nM), SiRNA-*YAP1* (60 nM) and SiRNA-*β-casein* (60 nM) treatment experiments. The effect of Si-NC (60 nM) or Si-NC (60 nM), SiRNA-*LRP6* (60 nM), SiRNA-*YAP1* (60 nM) and SiRNA-*β-casein* (60 nM) for 48 h on *β-casein* protein expression is evaluated by western blot analysis in GMECs. Total protein is harvested 48 h post-treatment, respectively.

**Table S1.** Predicted miR-30e-5p target genes are associated with fat metabolism. (The  $p$ -value is calculated using Fisher's exact test.)

| DO Term                                        | Number of Target Genes | $p$ -Value           |
|------------------------------------------------|------------------------|----------------------|
| Regulation of fatty acid oxidation             | 3                      | $5.6 \times 10^{-1}$ |
| Regulation of fatty acid metabolic process     | 3                      | $8.4 \times 10^{-1}$ |
| Positive regulation of lipid metabolic process | 5                      | $3.5 \times 10^{-1}$ |
| Regulation of lipid metabolic process          | 7                      | $7.5 \times 10^{-1}$ |
| Lipid homeostasis                              | 5                      | $4.3 \times 10^{-1}$ |
| Lipid transporter activity                     | 6                      | $4.1 \times 10^{-1}$ |

**Table S2.** Predicted miR-15a target genes are associated with fat metabolism. (The *p*-value is calculated using Fisher's exact test.)

| DO Term                | Number of Target Genes | <i>p</i> -Value      |
|------------------------|------------------------|----------------------|
| Lipid metabolism       | 11                     | $3.0 \times 10^{-1}$ |
| Cholesterol metabolism | 6                      | $2.7 \times 10^{-2}$ |
| Steroid metabolism     | 6                      | $1.2 \times 10^{-1}$ |
| Protein-lipid complex  | 3                      | $5.4 \times 10^{-1}$ |
| Lipid transport        | 9                      | $6.3 \times 10^{-1}$ |
| Lipid localization     | 9                      | $7.2 \times 10^{-1}$ |
| Lipid homeostasis      | 3                      | $8.1 \times 10^{-1}$ |
