# Supplementary material for: miR-30e-5p and miR-15a Synergistically Regulate Fatty Acid Metabolism in Goat Mammary Epithelial Cells via LRP6 and YAP1
Source: Int J Mol Sci. 2016 Nov 16;17(11):1909. doi: 10.3390/ijms17111909 (PMC5133906; doi:10.3390/ijms17111909)
Supplement: Supplementary file 1 [file ijms-17-01909-s001.zip › ijms-150666-Supplementary Materials/ijms-150666-Supplmentary.xlsx]

## Sheet: S-1 Capra hircus primary miRNAs
>oar-miR-494-3p MIMAT0019268	>oar-miR-494-3p MIMAT0019268	UGAAACAUACACGGGAAACCUCU
UGAAACAUACACGGGAAACCUCU	>oar-miR-148a MIMAT0030033	UCAGUGCACUACAGAACUUUGU
>oar-miR-148a MIMAT0030033	>oar-miR-377-3p MIMAT0019322	AUCACACAAAGGCAACUUUCGU
UCAGUGCACUACAGAACUUUGU	>oar-miR-376b-5p MIMAT0019284	GGUGGAUAUUCCUUCUAUGUUU
>oar-miR-377-3p MIMAT0019322	>oar-miR-299-5p MIMAT0019251	UGGUUUACCGUCCCACAUACAU
AUCACACAAAGGCAACUUUCGU	>oar-miR-191 MIMAT0030038	CAACGGAAUCCCAAAAGCAGCU
>oar-miR-376b-5p MIMAT0019284	>oar-miR-668-3p MIMAT0019311	AUGUCACUCGGCCCACUACCC
GGUGGAUAUUCCUUCUAUGUUU	>oar-miR-543-3p MIMAT0019272	AAACAUUCGCGGUGCACUUCUUU
>oar-miR-299-5p MIMAT0019251	>oar-miR-411b-3p MIMAT0019256	UAUGUCACAUGGUCCACUAAU
UGGUUUACCGUCCCACAUACAU	>oar-let-7c MIMAT0014964	UGAGGUAGUAGGUUGUAUGGUU
>oar-miR-191 MIMAT0030038	>oar-miR-377-5p MIMAT0019321	AGAGGUUGCCUUUGGUGAAUUC
CAACGGAAUCCCAAAAGCAGCU	>oar-miR-103 MIMAT0030027	AGCAGCAUUGUACAGGGCUAUG
>oar-miR-668-3p MIMAT0019311	>oar-miR-143 MIMAT0030032	UGAGAUGAAGCACUGUAGCUC
AUGUCACUCGGCCCACUACCC	>oar-miR-654-3p MIMAT0019283	UAUGUCUGCUGACCAUCACCUUUA
>oar-miR-543-3p MIMAT0019272	>oar-miR-10a MIMAT0030030	UACCCUGUAGAUCCGAAUUUG
AAACAUUCGCGGUGCACUUCUUU	>oar-miR-19b MIMAT0030041	UGUGCAAAUCCAUGCAAAACUGA
>oar-miR-411b-3p MIMAT0019256	>oar-miR-655-3p MIMAT0019301	AUAAUACAUGGUUAACCUCUCU
UAUGUCACAUGGUCCACUAAU	>oar-miR-362 MIMAT0030060	AAUCCUUGGAACCUAGGUGUGAGU
>oar-let-7c MIMAT0014964	>oar-miR-136 MIMAT0001417	ACUCCAUUUGUUUUGAUGAUGGA
UGAGGUAGUAGGUUGUAUGGUU	>oar-miR-30d MIMAT0030059	UGUAAACAUCCCCGACUGG
>oar-miR-377-5p MIMAT0019321	>oar-miR-1185-5p MIMAT0019288	AGAGGAUACCCUUUGUAUGUUC
AGAGGUUGCCUUUGGUGAAUUC	>oar-miR-376d MIMAT0019281	AUCAUAGAGGAAAAUCCACAU
>oar-miR-103 MIMAT0030027	>oar-miR-369-5p MIMAT0019331	AGAUCGACCGUGUUAUAUUCG
AGCAGCAUUGUACAGGGCUAUG	>oar-miR-200b MIMAT0030043	UAAUACUGCCUGGUAAUGAUG
>oar-miR-143 MIMAT0030032	>oar-miR-369-3p MIMAT0019332	AAUAAUACAUGGUUGAUCUUU
UGAGAUGAAGCACUGUAGCUC	>oar-miR-29a MIMAT0014967	UAGCACCAUCUGAAAUCGGUU
>oar-miR-654-3p MIMAT0019283	>oar-miR-376e-5p MIMAT0019277	GGUGGAUAUUCCUUCUAUGUUU
UAUGUCUGCUGACCAUCACCUUUA	>oar-let-7a MIMAT0030022	UGAGGUAGUAGGUUGUAUAGUU
>oar-miR-10a MIMAT0030030	>oar-miR-376c-3p MIMAT0019280	AACAUAGAGGAAAUUCCACGU
UACCCUGUAGAUCCGAAUUUG	>oar-let-7g MIMAT0030025	UGAGGUAGUAGUUUGUACAGU
>oar-miR-19b MIMAT0030041	>oar-miR-3956-5p MIMAT0019290	GUACGUGGAUGCUGAAGGUCAGA
UGUGCAAAUCCAUGCAAAACUGA	>oar-miR-411a-5p MIMAT0019249	AUAGUAGACCGUAUAGCGUACG
>oar-miR-655-3p MIMAT0019301	>oar-miR-487a-5p MIMAT0019304	GUGGCUAUCCCUGCUGUGUUCG
AUAAUACAUGGUUAACCUCUCU	>oar-miR-1197-5p MIMAT0019257	CCCUUCCUGGUAUUUGAAGACG
>oar-miR-362 MIMAT0030060	>oar-miR-544-5p MIMAT0019298	UCUUGUUAAAAGGCAGAUUCU
AAUCCUUGGAACCUAGGUGUGAGU	>oar-miR-3959-3p MIMAT0019303	UGUAUGUCAACUGAUCCACAGU
>oar-miR-136 MIMAT0001417	>oar-miR-381-3p MIMAT0019293	AUAUACAAGGGCAAGCUCUCU
ACUCCAUUUGUUUUGAUGAUGGA	>oar-miR-150 MIMAT0030034	UCUCCCAACCCUUGUACCAGUG
>oar-miR-30d MIMAT0030059	>oar-miR-3958-5p MIMAT0019275	AGGUUGUCCGUGAUGUAUUUGC
UGUAAACAUCCCCGACUGG	>oar-miR-668-5p MIMAT0019310	GUAAGUGCGUCUCGGGUGAGC
>oar-miR-1185-5p MIMAT0019288	>oar-miR-496-5p MIMAT0019319	GAGUCGGGUACUCGAAUGGA
AGAGGAUACCCUUUGUAUGUUC	>oar-miR-3959-5p MIMAT0019302	GGUUGAUCAGAGAACAUACAUU
>oar-miR-376d MIMAT0019281	>oar-miR-382-3p MIMAT0019307	AAUCAUUCACGGACAACACUU
AUCAUAGAGGAAAAUCCACAU	>oar-miR-539-5p MIMAT0019296	AGAAAUUAUCCUUGGUGUGUUC
>oar-miR-369-5p MIMAT0019331	>oar-miR-382-5p MIMAT0019306	GAAGUUGUUCGUGGUGGAUUCG
AGAUCGACCGUGUUAUAUUCG	>oar-miR-433-3p MIMAT0019242	AUCAUGAUGGGCUCCUCGGUGU
>oar-miR-200b MIMAT0030043	>oar-miR-107 MIMAT0030029	AGCAGCAUUGUACAGGGCUAUC
UAAUACUGCCUGGUAAUGAUG	>oar-miR-411a-3p MIMAT0019250	UAUGUAACACGGUCCACUAAC
>oar-miR-369-3p MIMAT0019332	>oar-miR-431 MIMAT0001414	UGUCUUGCAGGCCGUCAUGCAGG
AAUAAUACAUGGUUGAUCUUU	>oar-miR-381-5p MIMAT0019292	AGCGAGGUUGCCCUUUGUAU
>oar-miR-29a MIMAT0014967	>oar-miR-16b MIMAT0030036	UAGCAGCACGUAAAUAUUGG
UAGCACCAUCUGAAAUCGGUU	>oar-miR-412-3p MIMAT0019329	UGGUCGACCAGUUGGAAAGUAAU
>oar-miR-376e-5p MIMAT0019277	>oar-miR-154a-5p MIMAT0019315	UAGGUUAUCCGUGUAGCCUUCG
GGUGGAUAUUCCUUCUAUGUUU	>oar-miR-539-3p MIMAT0019297	AAUCAUACAAGGACAAUUUCUUU
>oar-let-7a MIMAT0030022	>oar-miR-379-5p MIMAT0019247	UGGUAGACUAUGGAACGUAGGC
UGAGGUAGUAGGUUGUAUAGUU	>oar-miR-30a-5p MIMAT0030055	UGUAAACAUCCUCGACUGGAAGC
>oar-miR-376c-3p MIMAT0019280	>oar-miR-323c MIMAT0019335	CACAAUACACGGUCGGCCUCU
AACAUAGAGGAAAUUCCACGU	>oar-miR-30c MIMAT0030058	UGUAAACAUCCUACACUCUCA
>oar-let-7g MIMAT0030025	>oar-miR-26a MIMAT0030051	UUCAAGUAAUCCAGGAUAGGCU
UGAGGUAGUAGUUUGUACAGU	>oar-miR-106a MIMAT0030061	AAAAGUGCUUACAGUGCAGGU
>oar-miR-3956-5p MIMAT0019290	>oar-miR-154b-3p MIMAT0019318	AAUCAUACAUGGUUGACCUUUUU
GUACGUGGAUGCUGAAGGUCAGA	>oar-miR-27a MIMAT0030053	UUCACAGUGGCUAAGUUCCGC
>oar-miR-411a-5p MIMAT0019249	>oar-miR-200a MIMAT0030042	AACACUGUCUGGUAACGAU
AUAGUAGACCGUAUAGCGUACG	>oar-miR-1197-3p MIMAT0019258	UAGGACACAUGGUCUACUUCU
>oar-miR-487a-5p MIMAT0019304	>oar-miR-21 MIMAT0014966	UAGCUUAUCAGACUGAUGUUGAC
GUGGCUAUCCCUGCUGUGUUCG	>oar-let-7i MIMAT0030026	UGAGGUAGUAGUUUGUGCUGUU
>oar-miR-1197-5p MIMAT0019257	>oar-miR-543-5p MIMAT0019271	ACCUGUGGUGCUUAAGGAG
CCCUUCCUGGUAUUUGAAGACG	>oar-miR-493-3p MIMAT0019238	UGAAGGUCUACUGUGUGCCAGG
>oar-miR-544-5p MIMAT0019298	>oar-miR-485-3p MIMAT0019313	GUCAUACACGGCUCUCCUCUCU
UCUUGUUAAAAGGCAGAUUCU	>oar-miR-3958-3p MIMAT0019276	AGAUAUUGCACGGUUGAUCUCU
>oar-miR-3959-3p MIMAT0019303	>oar-miR-380-3p MIMAT0019254	UAUGUAAUGUGGUCCACGUCU
UGUAUGUCAACUGAUCCACAGU	>oar-miR-409-5p MIMAT0019327	AGGUUACCCGAGCAACUUUGCAU
>oar-miR-381-3p MIMAT0019293	>oar-miR-376b-3p MIMAT0019285	AUCAUAGAGGAAAAUCCAUGU
AUAUACAAGGGCAAGCUCUCU	>oar-miR-329b-3p MIMAT0019264	AACACACCUGGUUAACCUCUUU
>oar-miR-150 MIMAT0030034	>oar-miR-379-3p MIMAT0019248	UAUGUAACAUGGUCCACUAACU
UCUCCCAACCCUUGUACCAGUG	>oar-miR-194 MIMAT0030039	UGUAACAGCAACUCCAUGUGGA
>oar-miR-3958-5p MIMAT0019275	>oar-miR-432 MIMAT0001416	UCUUGGAGUAGGUCAUUGGGUGG
AGGUUGUCCGUGAUGUAUUUGC	>oar-miR-376a-5p MIMAT0019286	UAGAUUCUCCUUCUAUGAGUAC
>oar-miR-668-5p MIMAT0019310	>oar-miR-544-3p MIMAT0019299	AUUCUGCAUUUUUAGCAAGUU
GUAAGUGCGUCUCGGGUGAGC	>oar-miR-493-5p MIMAT0019237	UUGUACAUGGUAGGCUUUCAUU
>oar-miR-496-5p MIMAT0019319	>oar-miR-411b-5p MIMAT0019255	UGGUCGACCAUAAAACGUACGU
GAGUCGGGUACUCGAAUGGA	>oar-miR-410-3p MIMAT0019334	AAUAUAACACAGAUGGCCUGU
>oar-miR-3959-5p MIMAT0019302	>oar-miR-541-3p MIMAT0019324	UGGUGGGCACAGAAUCCGGCCUCU
GGUUGAUCAGAGAACAUACAUU	>oar-miR-134-5p MIMAT0019308	UGUGACUGGUUGACCAGAGGG
>oar-miR-382-3p MIMAT0019307	>oar-miR-3956-3p MIMAT0019291	UCUGACCUUCCUGCAUCCCGUUC
AAUCAUUCACGGACAACACUU	>oar-miR-655-5p MIMAT0019300	AGAGGUUAUCCGUGUUAUGUUC
>oar-miR-539-5p MIMAT0019296	>oar-miR-376e-3p MIMAT0019278	AACAUAGAGGAAAAUCCACAUU
AGAAAUUAUCCUUGGUGUGUUC	>oar-miR-410-5p MIMAT0019333	CGCCACUUUGGGUACUUGAGGAG
>oar-miR-382-5p MIMAT0019306	>oar-miR-1193-3p MIMAT0019270	UAGGUCACCCGUUUGACUAUCC
GAAGUUGUUCGUGGUGGAUUCG	>oar-miR-496-3p MIMAT0019320	UGAGUAUUACAUGGCCAAUCU
>oar-miR-433-3p MIMAT0019242	>oar-miR-1185-3p MIMAT0019289	AUAUACAGAGGGAGACUCUUAU
AUCAUGAUGGGCUCCUCGGUGU	>oar-miR-376a-3p MIMAT0019287	AUCAUAGAGGAAAAUCCACGU
>oar-miR-107 MIMAT0030029	>oar-miR-25 MIMAT0030050	AUUGCACUUGUCUCGGUCUGA
AGCAGCAUUGUACAGGGCUAUC	>oar-miR-30a-3p MIMAT0030056	CUUUCAGUCGGAUGUUUGCAG
>oar-miR-411a-3p MIMAT0019250	>oar-miR-127 MIMAT0001415	AUCGGAUCCGUCUGAGCUUGGCU
UAUGUAACACGGUCCACUAAC	>oar-let-7f MIMAT0030024	UGAGGUAGUAGAUUGUAUAGU
>oar-miR-431 MIMAT0001414	>oar-miR-376c-5p MIMAT0019279	GUGGAUAUUCCGUCUAUGUUU
UGUCUUGCAGGCCGUCAUGCAGG	>oar-miR-758-5p MIMAT0019261	UGGUUGACCAGAGAGCACACG
>oar-miR-381-5p MIMAT0019292	>oar-let-7d MIMAT0030023	AGAGGUAGUAGGUUGCAUAG
AGCGAGGUUGCCCUUUGUAU	>oar-miR-485-5p MIMAT0019312	AGAGGCUGGCCGUGAUGAAUUCG
>oar-miR-16b MIMAT0030036	>oar-miR-412-5p MIMAT0019330	CUUCACCUGGUCCACUAGCU
UAGCAGCACGUAAAUAUUGG	>oar-miR-218a MIMAT0030045	UUGUGCUUGAUCUAACCAUGU
>oar-miR-412-3p MIMAT0019329	>oar-miR-495-3p MIMAT0019274	AAACAAACAUGGUGCACUUCUU
UGGUCGACCAGUUGGAAAGUAAU	>oar-miR-299-3p MIMAT0019252	UAUGUGGGACGGUAAACCACAA
>oar-miR-154a-5p MIMAT0019315	>oar-miR-487a-3p MIMAT0019305	AUCAUACAGGGACAUCCAGUUU
UAGGUUAUCCGUGUAGCCUUCG	>oar-miR-106b MIMAT0030028	UAAAGUGCUGACAGUGCAGAU
>oar-miR-539-3p MIMAT0019297	>oar-miR-1193-5p MIMAT0019269	GGGAUGGUAGACCGGUGACGUGC
AAUCAUACAAGGACAAUUUCUUU	>oar-miR-329a-5p MIMAT0019265	GAGGUUUUCUAGGUCUCCGUUU
>oar-miR-379-5p MIMAT0019247	>oar-miR-23a MIMAT0030048	AUCACAUUGCCAGGGAUUUCCA
UGGUAGACUAUGGAACGUAGGC	>oar-miR-654-5p MIMAT0019282	AAAGGUGGUGGGCUGCGGAGCAUG
>oar-miR-30a-5p MIMAT0030055	>oar-miR-181a MIMAT0014973	AACAUUCAACGCUGUCGGUGAGU
UGUAAACAUCCUCGACUGGAAGC	>oar-miR-99a MIMAT0030064	AACCCGUAGAUCCGAUCUUG
>oar-miR-323c MIMAT0019335	>oar-miR-487b-3p MIMAT0019295	AAUCGUACAGGGUCAUCCACUU
CACAAUACACGGUCGGCCUCU	>oar-miR-323a-3p MIMAT0019260	CACAUUACACGGUCGACCUCU
>oar-miR-30c MIMAT0030058	>oar-miR-133 MIMAT0014972	UUGGUCCCCUUCAACCAGCUGU
UGUAAACAUCCUACACUCUCA	>oar-miR-370-3p MIMAT0019244	GCCUGCUGGGGUGGAACCUGGUCU
>oar-miR-26a MIMAT0030051	>oar-miR-29b MIMAT0030054	UAGCACCAUUUGAAAUCAGUGU
UUCAAGUAAUCCAGGAUAGGCU	>oar-miR-487b-5p MIMAT0019294	AGUGGUUAUCCCUGUCCUGUUC
>oar-miR-106a MIMAT0030061	>oar-miR-494-5p MIMAT0019267	AGGUUAUCCGUGUUGUCUUCUCU
AAAAGUGCUUACAGUGCAGGU	>oar-miR-665-5p MIMAT0019239	AGGGGUCUUGGCCUCUGCCCAG
>oar-miR-154b-3p MIMAT0019318	>oar-miR-323a-5p MIMAT0019259	AGGUGGUCCGUGGCGCGUUCG
AAUCAUACAUGGUUGACCUUUUU	>oar-miR-3955-5p MIMAT0019245	UUUGAUGGCUGAUCCUCUCACU
>oar-miR-27a MIMAT0030053	>oar-let-7b MIMAT0014963	UGAGGUAGUAGGUUGUGUGGU
UUCACAGUGGCUAAGUUCCGC	>oar-miR-370-5p MIMAT0019243	CAGGUCACGUCUCUGCAGUUAC
>oar-miR-200a MIMAT0030042	>oar-miR-374a MIMAT0030062	UUAUAAUACAACCUGAUAAGUG
AACACUGUCUGGUAACGAU	>oar-miR-23b MIMAT0030049	AUCACAUUGCCAGGGAUU
>oar-miR-1197-3p MIMAT0019258	>oar-miR-374b MIMAT0030063	AUAUAAUACAACCUGCUAAGU
UAGGACACAUGGUCUACUUCU	>oar-miR-199a-3p MIMAT0030040	ACAGUAGUCUGCACAUUGGUU
>oar-miR-21 MIMAT0014966	>oar-miR-17-5p MIMAT0030037	CAAAGUGCUUACAGUGCAGGUA
UAGCUUAUCAGACUGAUGUUGAC	>oar-miR-152 MIMAT0030035	UCAGUGCAUGACAGAACUUGG
>oar-let-7i MIMAT0030026	>oar-miR-323b MIMAT0019314	CCCAAUACACGGUCGAUCUCU
UGAGGUAGUAGUUUGUGCUGUU	>oar-miR-154b-5p MIMAT0019317	AGAGGUCUUCCAUGGUGCAUUCG
>oar-miR-543-5p MIMAT0019271	>oar-miR-125b MIMAT0014971	UCCCUGAGACCCUAACUUGUG
ACCUGUGGUGCUUAAGGAG	>oar-miR-22-3p MIMAT0030046	AAGCUGCCAGUUGAAGAACUG
>oar-miR-493-3p MIMAT0019238	>oar-miR-329b-5p MIMAT0019263	GAGGUUUUCUGGGUUUCUGUUUC
UGAAGGUCUACUGUGUGCCAGG	>oar-miR-495-5p MIMAT0019273	AGAAGUCGCCCAUGUUCUUUUCG
>oar-miR-485-3p MIMAT0019313	>oar-miR-221 MIMAT0030047	AGCUACAUUGUCUGCUGGGUUU
GUCAUACACGGCUCUCCUCUCU	>oar-miR-433-5p MIMAT0019241	UACGGUGAGCCUGUCAUUGUUCA
>oar-miR-3958-3p MIMAT0019276	>oar-miR-3955-3p MIMAT0019246	UGGGAUUUUAGUCCAUCAUAG
AGAUAUUGCACGGUUGAUCUCU	>oar-miR-3957-5p MIMAT0019325	CUCGGAGAGUGGAGCUGUGGGUGU
>oar-miR-380-3p MIMAT0019254	>oar-miR-200c MIMAT0030044	UAAUACUGCCGGGUAAUGAUGG
UAUGUAAUGUGGUCCACGUCU	>oar-miR-758-3p MIMAT0019262	UUUGUGACCUGGUCCACUAA
>oar-miR-409-5p MIMAT0019327	>oar-miR-665-3p MIMAT0019240	ACCAGUAGGCCGAGGCCCCUCA
AGGUUACCCGAGCAACUUUGCAU	>oar-miR-3957-3p MIMAT0019326	ACGCACAGCACCUCACUGAGCU
>oar-miR-376b-3p MIMAT0019285	>oar-miR-329a-3p MIMAT0019266	AACACACCUGGUUAACCUUUUU
AUCAUAGAGGAAAAUCCAUGU	>oar-miR-380-5p MIMAT0019253	AUGGUUGACCACAGAACAUGCG
>oar-miR-329b-3p MIMAT0019264	>oar-miR-541-5p MIMAT0019323	AAAGGAUUCUGCUGUCGGUCCCACU
AACACACCUGGUUAACCUCUUU	>oar-miR-134-3p MIMAT0019309	UCUGGGCUGCCUCGUCACCAACC
>oar-miR-379-3p MIMAT0019248	>oar-miR-30b MIMAT0030057	UGUAAACAUCCUACACUCAGC
UAUGUAACAUGGUCCACUAACU	>oar-miR-10b MIMAT0030031	ACCCUGUAGAACCGAAUUUGUG
>oar-miR-194 MIMAT0030039	>oar-miR-409-3p MIMAT0019328	CGAAUGUUGCUCGGUGAACCCCU
UGUAACAGCAACUCCAUGUGGA	>oar-miR-26b MIMAT0030052	UUCAAGUAAUUCAGGAUAGGU
>oar-miR-432 MIMAT0001416	>oar-miR-154a-3p MIMAT0019316	AAUCAUACACGGUUCACCUAUU
UCUUGGAGUAGGUCAUUGGGUGG
>oar-miR-376a-5p MIMAT0019286
UAGAUUCUCCUUCUAUGAGUAC
>oar-miR-544-3p MIMAT0019299
AUUCUGCAUUUUUAGCAAGUU
>oar-miR-493-5p MIMAT0019237
UUGUACAUGGUAGGCUUUCAUU
>oar-miR-411b-5p MIMAT0019255
UGGUCGACCAUAAAACGUACGU
>oar-miR-410-3p MIMAT0019334
AAUAUAACACAGAUGGCCUGU
>oar-miR-541-3p MIMAT0019324
UGGUGGGCACAGAAUCCGGCCUCU
>oar-miR-134-5p MIMAT0019308
UGUGACUGGUUGACCAGAGGG
>oar-miR-3956-3p MIMAT0019291
UCUGACCUUCCUGCAUCCCGUUC
>oar-miR-655-5p MIMAT0019300
AGAGGUUAUCCGUGUUAUGUUC
>oar-miR-376e-3p MIMAT0019278
AACAUAGAGGAAAAUCCACAUU
>oar-miR-410-5p MIMAT0019333
CGCCACUUUGGGUACUUGAGGAG
>oar-miR-1193-3p MIMAT0019270
UAGGUCACCCGUUUGACUAUCC
>oar-miR-496-3p MIMAT0019320
UGAGUAUUACAUGGCCAAUCU
>oar-miR-1185-3p MIMAT0019289
AUAUACAGAGGGAGACUCUUAU
>oar-miR-376a-3p MIMAT0019287
AUCAUAGAGGAAAAUCCACGU
>oar-miR-25 MIMAT0030050
AUUGCACUUGUCUCGGUCUGA
>oar-miR-30a-3p MIMAT0030056
CUUUCAGUCGGAUGUUUGCAG
>oar-miR-127 MIMAT0001415
AUCGGAUCCGUCUGAGCUUGGCU
>oar-let-7f MIMAT0030024
UGAGGUAGUAGAUUGUAUAGU
>oar-miR-376c-5p MIMAT0019279
GUGGAUAUUCCGUCUAUGUUU
>oar-miR-758-5p MIMAT0019261
UGGUUGACCAGAGAGCACACG
>oar-let-7d MIMAT0030023
AGAGGUAGUAGGUUGCAUAG
>oar-miR-485-5p MIMAT0019312
AGAGGCUGGCCGUGAUGAAUUCG
>oar-miR-412-5p MIMAT0019330
CUUCACCUGGUCCACUAGCU
>oar-miR-218a MIMAT0030045
UUGUGCUUGAUCUAACCAUGU
>oar-miR-495-3p MIMAT0019274
AAACAAACAUGGUGCACUUCUU
>oar-miR-299-3p MIMAT0019252
UAUGUGGGACGGUAAACCACAA
>oar-miR-487a-3p MIMAT0019305
AUCAUACAGGGACAUCCAGUUU
>oar-miR-106b MIMAT0030028
UAAAGUGCUGACAGUGCAGAU
>oar-miR-1193-5p MIMAT0019269
GGGAUGGUAGACCGGUGACGUGC
>oar-miR-329a-5p MIMAT0019265
GAGGUUUUCUAGGUCUCCGUUU
>oar-miR-23a MIMAT0030048
AUCACAUUGCCAGGGAUUUCCA
>oar-miR-654-5p MIMAT0019282
AAAGGUGGUGGGCUGCGGAGCAUG
>oar-miR-181a MIMAT0014973
AACAUUCAACGCUGUCGGUGAGU
>oar-miR-99a MIMAT0030064
AACCCGUAGAUCCGAUCUUG
>oar-miR-487b-3p MIMAT0019295
AAUCGUACAGGGUCAUCCACUU
>oar-miR-323a-3p MIMAT0019260
CACAUUACACGGUCGACCUCU
>oar-miR-133 MIMAT0014972
UUGGUCCCCUUCAACCAGCUGU
>oar-miR-370-3p MIMAT0019244
GCCUGCUGGGGUGGAACCUGGUCU
>oar-miR-29b MIMAT0030054
UAGCACCAUUUGAAAUCAGUGU
>oar-miR-487b-5p MIMAT0019294
AGUGGUUAUCCCUGUCCUGUUC
>oar-miR-494-5p MIMAT0019267
AGGUUAUCCGUGUUGUCUUCUCU
>oar-miR-665-5p MIMAT0019239
AGGGGUCUUGGCCUCUGCCCAG
>oar-miR-323a-5p MIMAT0019259
AGGUGGUCCGUGGCGCGUUCG
>oar-miR-3955-5p MIMAT0019245
UUUGAUGGCUGAUCCUCUCACU
>oar-let-7b MIMAT0014963
UGAGGUAGUAGGUUGUGUGGU
>oar-miR-370-5p MIMAT0019243
CAGGUCACGUCUCUGCAGUUAC
>oar-miR-374a MIMAT0030062
UUAUAAUACAACCUGAUAAGUG
>oar-miR-23b MIMAT0030049
AUCACAUUGCCAGGGAUU
>oar-miR-374b MIMAT0030063
AUAUAAUACAACCUGCUAAGU
>oar-miR-199a-3p MIMAT0030040
ACAGUAGUCUGCACAUUGGUU
>oar-miR-17-5p MIMAT0030037
CAAAGUGCUUACAGUGCAGGUA
>oar-miR-152 MIMAT0030035
UCAGUGCAUGACAGAACUUGG
>oar-miR-323b MIMAT0019314
CCCAAUACACGGUCGAUCUCU
>oar-miR-154b-5p MIMAT0019317
AGAGGUCUUCCAUGGUGCAUUCG
>oar-miR-125b MIMAT0014971
UCCCUGAGACCCUAACUUGUG
>oar-miR-22-3p MIMAT0030046
AAGCUGCCAGUUGAAGAACUG
>oar-miR-329b-5p MIMAT0019263
GAGGUUUUCUGGGUUUCUGUUUC
>oar-miR-495-5p MIMAT0019273
AGAAGUCGCCCAUGUUCUUUUCG
>oar-miR-221 MIMAT0030047
AGCUACAUUGUCUGCUGGGUUU
>oar-miR-433-5p MIMAT0019241
UACGGUGAGCCUGUCAUUGUUCA
>oar-miR-3955-3p MIMAT0019246
UGGGAUUUUAGUCCAUCAUAG
>oar-miR-3957-5p MIMAT0019325
CUCGGAGAGUGGAGCUGUGGGUGU
>oar-miR-200c MIMAT0030044
UAAUACUGCCGGGUAAUGAUGG
>oar-miR-758-3p MIMAT0019262
UUUGUGACCUGGUCCACUAA
>oar-miR-665-3p MIMAT0019240
ACCAGUAGGCCGAGGCCCCUCA
>oar-miR-3957-3p MIMAT0019326
ACGCACAGCACCUCACUGAGCU
>oar-miR-329a-3p MIMAT0019266
AACACACCUGGUUAACCUUUUU
>oar-miR-380-5p MIMAT0019253
AUGGUUGACCACAGAACAUGCG
>oar-miR-541-5p MIMAT0019323
AAAGGAUUCUGCUGUCGGUCCCACU
>oar-miR-134-3p MIMAT0019309
UCUGGGCUGCCUCGUCACCAACC
>oar-miR-30b MIMAT0030057
UGUAAACAUCCUACACUCAGC
>oar-miR-10b MIMAT0030031
ACCCUGUAGAACCGAAUUUGUG
>oar-miR-409-3p MIMAT0019328
CGAAUGUUGCUCGGUGAACCCCU
>oar-miR-26b MIMAT0030052
UUCAAGUAAUUCAGGAUAGGU
>oar-miR-154a-3p MIMAT0019316
AAUCAUACACGGUUCACCUAUU

## Sheet: S-1 Bos taurus primary miRNAs 
>bta-miR-425-5p MIMAT0003832	>bta-miR-425-5p MIMAT0003832	AUGACACGAUCACUCCCGUUGA
AUGACACGAUCACUCCCGUUGA	>bta-miR-2468 MIMAT0012058	AUAGGAACAUGGAAGAUUGUCA
>bta-miR-2468 MIMAT0012058	>bta-miR-2284z MIMAT0025559	AAAAAAGUUUGUUUGGGUUUUU
AUAGGAACAUGGAAGAUUGUCA	>bta-miR-374a MIMAT0004342	UUAUAAUACAACCUGAUAAGUG
>bta-miR-2284z MIMAT0025559	>bta-miR-2400 MIMAT0011956	CCAGCACAGGCAGCUCGGACUGA
AAAAAAGUUUGUUUGGGUUUUU	>bta-miR-345-5p MIMAT0003800	GCUGACUCCUAGUCCAGUGCU
>bta-miR-374a MIMAT0004342	>bta-miR-3578 MIMAT0016934	GAAUCCACCACGAACAACUUC
UUAUAAUACAACCUGAUAAGUG	>bta-let-7a-5p MIMAT0003844	UGAGGUAGUAGGUUGUAUAGUU
>bta-miR-2400 MIMAT0011956	>bta-miR-124a MIMAT0003811	UAAGGCACGCGGUGAAUGCCAAG
CCAGCACAGGCAGCUCGGACUGA	>bta-miR-2285p MIMAT0025532	AAAAACUUGAGUGAACUUUUGG
>bta-miR-345-5p MIMAT0003800	>bta-miR-3956 MIMAT0025544	ACGUGGAUGCUGAAGGUCAGAGG
GCUGACUCCUAGUCCAGUGCU	>bta-miR-2351 MIMAT0011887	AUAGUUAUUGUAUUGUGUUU
>bta-miR-3578 MIMAT0016934	>bta-miR-2314 MIMAT0011834	UGCCCAUGAUGACUGCUGACC
GAAUCCACCACGAACAACUUC	>bta-miR-135b MIMAT0009229	UAUGGCUUUUCAUUCCUAUGUGA
>bta-let-7a-5p MIMAT0003844	>bta-miR-25 MIMAT0003853	CAUUGCACUUGUCUCGGUCUGA
UGAGGUAGUAGGUUGUAUAGUU	>bta-miR-23b-3p MIMAT0003852	AUCACAUUGCCAGGGAUUACCAC
>bta-miR-124a MIMAT0003811	>bta-miR-24-3p MIMAT0003840	UGGCUCAGUUCAGCAGGAACAG
UAAGGCACGCGGUGAAUGCCAAG	>bta-miR-1247-5p MIMAT0025549	ACCCGUCCCGUGCGUCCCCGGA
>bta-miR-2285p MIMAT0025532	>bta-miR-3957 MIMAT0025548	CUCGGAGAGUGCAGCUGUGG
AAAAACUUGAGUGAACUUUUGG	>bta-miR-2888 MIMAT0013846	GGUGGGGUGGGGGGGUUGG
>bta-miR-3956 MIMAT0025544	>bta-miR-410 MIMAT0009311	AAUAUAACACAGAUGGCCUGU
ACGUGGAUGCUGAAGGUCAGAGG	>bta-miR-2483-3p MIMAT0012076	AAACAUCUGGUUGGUUGAGAGA
>bta-miR-2351 MIMAT0011887	>bta-miR-2327 MIMAT0011856	AGGGGGCGAGACUCAAGCACUGGC
AUAGUUAUUGUAUUGUGUUU	>bta-miR-2406 MIMAT0011964	AAGGGAAGAAGGAAGCUGGAUU
>bta-miR-2314 MIMAT0011834	>bta-miR-2370-3p MIMAT0011915	UAAGCAACUUUCCUUUCUCCA
UGCCCAUGAUGACUGCUGACC	>bta-miR-1277 MIMAT0024569	UACGUAGAUAUAUAUGUAUUUU
>bta-miR-135b MIMAT0009229	>bta-miR-6532 MIMAT0025568	AGUGCGGACAGGAAAGACGGUUU
UAUGGCUUUUCAUUCCUAUGUGA	>bta-miR-2448-3p MIMAT0012026	GUGGUUGAUUGGAUCCGUGGGU
>bta-miR-25 MIMAT0003853	>bta-miR-2881 MIMAT0013839	GGGGCGGGGGGGCGGGUG
CAUUGCACUUGUCUCGGUCUGA	>bta-miR-877 MIMAT0009381	GUAGAGGAGAUGGCGCAGGG
>bta-miR-23b-3p MIMAT0003852	>bta-miR-2429 MIMAT0011999	AAAAACUUUUCCCUUUUUUU
AUCACAUUGCCAGGGAUUACCAC	>bta-miR-2411-5p MIMAT0011972	UGGAGUGACUGUCAGAUGCAGCCA
>bta-miR-24-3p MIMAT0003840	>bta-miR-2284t-5p MIMAT0011831	GAAACAUUCACUCGGGUUUUU
UGGCUCAGUUCAGCAGGAACAG	>bta-miR-6123 MIMAT0024596	UGCCAAGCCCACGUUCAAAGG
>bta-miR-1247-5p MIMAT0025549	>bta-miR-1842 MIMAT0036969	UGGCUCUGUGAGGUCGGCUCA
ACCCGUCCCGUGCGUCCCCGGA	>bta-miR-455-3p MIMAT0003836	GCAGUCCAUGGGCAUAUACACU
>bta-miR-3957 MIMAT0025548	>bta-miR-3600 MIMAT0016932	ACAGUUCUUCAACUGGCAGCUU
CUCGGAGAGUGCAGCUGUGG	>bta-miR-2430 MIMAT0012000	UCUGGGUCGGCAGGGGUUUCCGG
>bta-miR-2888 MIMAT0013846	>bta-miR-2461-3p MIMAT0012048	UCAGACUGAGAGCAGUGUGCCU
GGUGGGGUGGGGGGGUUGG	>bta-miR-2284q MIMAT0011957	GGCCAAAAAGUUCGUUCGGA
>bta-miR-410 MIMAT0009311	>bta-miR-1434-3p MIMAT0012040	GAAGAAAUCUAAGGUCUGAGG
AAUAUAACACAGAUGGCCUGU	>bta-miR-122 MIMAT0003849	UGGAGUGUGACAAUGGUGUUUG
>bta-miR-2483-3p MIMAT0012076	>bta-miR-2284x MIMAT0017395	UGAAAAGUUCGUUCGGGUUUU
AAACAUCUGGUUGGUUGAGAGA	>bta-miR-129-3p MIMAT0009222	AAGCCCUUACCCCAAAAAGCAU
>bta-miR-2327 MIMAT0011856	>bta-miR-7861 MIMAT0030441	UGCUACCUAGUCUGAGUGAGUGA
AGGGGGCGAGACUCAAGCACUGGC	>bta-miR-2348 MIMAT0011883	UUCGGGUGGUGUGGAGCGGCC
>bta-miR-2406 MIMAT0011964	>bta-miR-2446 MIMAT0012023	UAAAAUAUAUUUGAAAUCGGGCC
AAGGGAAGAAGGAAGCUGGAUU	>bta-miR-380-5p MIMAT0003803	UGGUUGACCAUAGAACAUGCGC
>bta-miR-2370-3p MIMAT0011915	>bta-miR-2284o MIMAT0012068	AAAGUUCGUUCGGGGUUUUC
UAAGCAACUUUCCUUUCUCCA	>bta-miR-200b MIMAT0003842	UAAUACUGCCUGGUAAUGAUG
>bta-miR-1277 MIMAT0024569	>bta-miR-504 MIMAT0009340	AGACCCUGGUCUGCACUCUGUC
UACGUAGAUAUAUAUGUAUUUU	>bta-miR-6120-3p MIMAT0024591	UAUGUUGGACAACGUGGAUAGC
>bta-miR-6532 MIMAT0025568	>bta-miR-21-3p MIMAT0003745	AACAGCAGUCGAUGGGCUGUCU
AGUGCGGACAGGAAAGACGGUUU	>bta-miR-193a-5p MIMAT0003794	UGGGUCUUUGCGGGCGAGAUGA
>bta-miR-2448-3p MIMAT0012026	>bta-miR-138 MIMAT0003813	AGCUGGUGUUGUGAAUCAGGCCG
GUGGUUGAUUGGAUCCGUGGGU	>bta-miR-2887 MIMAT0013845	CGGGACCGGGGUCCGGUGCG
>bta-miR-2881 MIMAT0013839	>bta-miR-2340 MIMAT0011875	GGACUUCCCUGGUGGUCUUGUG
GGGGCGGGGGGGCGGGUG	>bta-miR-101 MIMAT0003520	UACAGUACUGUGAUAACUGAA
>bta-miR-877 MIMAT0009381	>bta-miR-195 MIMAT0004335	UAGCAGCACAGAAAUAUUGGCA
GUAGAGGAGAUGGCGCAGGG	>bta-miR-450b MIMAT0024576	UUUUGCAAUAUGUUCCUGAAUA
>bta-miR-2429 MIMAT0011999	>bta-miR-2396 MIMAT0011949	UCAUGCACUGGGGUCUUGAUGG
AAAAACUUUUCCCUUUUUUU	>bta-miR-2431-3p MIMAT0012002	CACCCCCACUUGCAUGACCCUGA
>bta-miR-2411-5p MIMAT0011972	>bta-miR-31 MIMAT0003548	AGGCAAGAUGCUGGCAUAGCU
UGGAGUGACUGUCAGAUGCAGCCA	>bta-miR-3431 MIMAT0017394	CCUCAGUCAGCCUUGUGGAUGU
>bta-miR-2284t-5p MIMAT0011831	>bta-miR-224 MIMAT0009271	CAAGUCACUAGUGGUUCCGUUUA
GAAACAUUCACUCGGGUUUUU	>bta-miR-3120 MIMAT0024572	CACAGCAAGUGUAGACAGGCA
>bta-miR-6123 MIMAT0024596	>bta-miR-200c MIMAT0003823	UAAUACUGCCGGGUAAUGAUGGA
UGCCAAGCCCACGUUCAAAGG	>bta-miR-2397-3p MIMAT0011952	CAGAGCAGUGGCAAGAACGCAU
>bta-miR-1842 MIMAT0036969	>bta-miR-503-3p MIMAT0025558	GGAGUAUUGUUUCUGCUGCCCGG
UGGCUCUGUGAGGUCGGCUCA	>bta-miR-2415-5p MIMAT0011978	GGGAGUCGGUCCUGCCGGCCA
>bta-miR-455-3p MIMAT0003836	>bta-miR-219-3p MIMAT0012547	AGAAUUGUGGCUGGACAUCUG
GCAGUCCAUGGGCAUAUACACU	>bta-miR-17-5p MIMAT0003815	CAAAGUGCUUACAGUGCAGGUAGU
>bta-miR-3600 MIMAT0016932	>bta-miR-2416 MIMAT0011980	UGCAGUGCCCACUGUGGAAGAUG
ACAGUUCUUCAACUGGCAGCUU	>bta-miR-2305 MIMAT0011817	CGGGGGUGGCGGGGAGGGGG
>bta-miR-2430 MIMAT0012000	>bta-miR-551b MIMAT0009348	GGCGACCCAUACUUGGUUUCAG
UCUGGGUCGGCAGGGGUUUCCGG	>bta-miR-2333 MIMAT0011866	GCAAUGCAGACUCCAGGGCCC
>bta-miR-2461-3p MIMAT0012048	>bta-miR-1343-5p MIMAT0011839	UGGGGAGCGGCCCCCGGGCGGG
UCAGACUGAGAGCAGUGUGCCU	>bta-miR-6534 MIMAT0025570	UCUAAGAGCAGUCAGGACGGAU
>bta-miR-2284q MIMAT0011957	>bta-miR-2451 MIMAT0012031	AUGAGGUGCUCUGGAGAGUGGA
GGCCAAAAAGUUCGUUCGGA	>bta-miR-1777a MIMAT0012032	UGGGGGCGGUGGGGGGCGGG
>bta-miR-1434-3p MIMAT0012040	>bta-miR-3660 MIMAT0025555	ACUGACAGGAGAGCAUUUUAA
GAAGAAAUCUAAGGUCUGAGG	>bta-miR-2331-3p MIMAT0011864	ACCCUGCAGCCAAAGAAGCUA
>bta-miR-122 MIMAT0003849	>bta-miR-2357 MIMAT0011894	UUGGUCUGGCACAGAGCAUGUGAG
UGGAGUGUGACAAUGGUGUUUG	>bta-miR-488 MIMAT0009330	UUGAAAGGCUGUUUCUUGGUC
>bta-miR-2284x MIMAT0017395	>bta-miR-2338 MIMAT0011872	AGGCUGAGGACAGGGGCUGACGU
UGAAAAGUUCGUUCGGGUUUU	>bta-miR-2474 MIMAT0012065	UACCGGGCCAGCUGGAAGGAGA
>bta-miR-129-3p MIMAT0009222	>bta-miR-2486-3p MIMAT0012082	AAAUGAGGGGCAAAAUCUGUGUU
AAGCCCUUACCCCAAAAAGCAU	>bta-miR-2903 MIMAT0013861	UUCCGCGCUCUACGCCAGC
>bta-miR-7861 MIMAT0030441	>bta-miR-2387 MIMAT0011939	UGGAAGGCCUGGCUUUGCAGCG
UGCUACCUAGUCUGAGUGAGUGA	>bta-miR-4657 MIMAT0036970	AAUGUGGAAGUGGUCUGAGGCAU
>bta-miR-2348 MIMAT0011883	>bta-miR-490 MIMAT0009331	CAACCUGGAGGACUCCAUGCUG
UUCGGGUGGUGUGGAGCGGCC	>bta-miR-182 MIMAT0009244	UUUGGCAAUGGUAGAACUCACACU
>bta-miR-2446 MIMAT0012023	>bta-miR-2335 MIMAT0011868	AGAUAAUGAUGACUAACUGAAU
UAAAAUAUAUUUGAAAUCGGGCC	>bta-miR-874 MIMAT0009378	CUGCCCUGGCCCGAGGGACCGA
>bta-miR-380-5p MIMAT0003803	>bta-miR-16b MIMAT0003525	UAGCAGCACGUAAAUAUUGGC
UGGUUGACCAUAGAACAUGCGC	>bta-miR-2350 MIMAT0011886	CAGCUCCUGUUUCUCUCCUCAG
>bta-miR-2284o MIMAT0012068	>bta-miR-2284h-5p MIMAT0012019	CCCAAAAGUUCGUUCGGGUUU
AAAGUUCGUUCGGGGUUUUC	>bta-miR-2284b MIMAT0011983	AAAAGUUCGUUUGGUUUUUUC
>bta-miR-200b MIMAT0003842	>bta-miR-144 MIMAT0009234	UACAGUAUAGAUGAUGUACUAG
UAAUACUGCCUGGUAAUGAUG	>bta-miR-496 MIMAT0009336	UGAGUAUUACAUGGCCAAUCUC
>bta-miR-504 MIMAT0009340	>bta-miR-2890 MIMAT0013848	GCCCCGGCCGCUCCCGGCCU
AGACCCUGGUCUGCACUCUGUC	>bta-miR-2360 MIMAT0011898	CGGGCAGGAGGCUGGAGGCGUU
>bta-miR-6120-3p MIMAT0024591	>bta-miR-2388-5p MIMAT0011940	AGCUCCCGUCUCCUCUGUGCUGA
UAUGUUGGACAACGUGGAUAGC	>bta-miR-544b MIMAT0009345	AUUCUGCAUUUCUAACAAGUUC
>bta-miR-21-3p MIMAT0003745	>bta-miR-27b MIMAT0003546	UUCACAGUGGCUAAGUUCUGC
AACAGCAGUCGAUGGGCUGUCU	>bta-miR-935 MIMAT0009385	CCAGUUACCGCUUCCGCUACCGC
>bta-miR-193a-5p MIMAT0003794	>bta-miR-193b MIMAT0009253	AACUGGCCCACAAAGUCCCGCUUU
UGGGUCUUUGCGGGCGAGAUGA	>bta-miR-7865 MIMAT0030450	CAGGGAGGGCAGGGGAGGG
>bta-miR-138 MIMAT0003813	>bta-miR-147 MIMAT0009237	GUGUGCGGAAAUGCUUCUGCUA
AGCUGGUGUUGUGAAUCAGGCCG	>bta-miR-2324 MIMAT0011853	UGGGGUUGGGGCAGUGUGGCUGU
>bta-miR-2887 MIMAT0013845	>bta-miR-339a MIMAT0009293	UCCCUGUCCUCCAGGAGCUCAC
CGGGACCGGGGUCCGGUGCG	>bta-miR-424-5p MIMAT0013593	CAGCAGCAAUUCAUGUUUUGA
>bta-miR-2340 MIMAT0011875	>bta-miR-142-3p MIMAT0003791	AGUGUUUCCUACUUUAUGGAUG
GGACUUCCCUGGUGGUCUUGUG	>bta-miR-374b MIMAT0009302	AUAUAAUACAACCUGCUAAGUG
>bta-miR-101 MIMAT0003520	>bta-miR-2285o MIMAT0025530	AAACCCGAACGAACUUUUGG
UACAGUACUGUGAUAACUGAA	>bta-miR-362-3p MIMAT0012548	AACACACCUAUUCAAGGAUUC
>bta-miR-195 MIMAT0004335	>bta-miR-133a MIMAT0009225	UUUGGUCCCCUUCAACCAGCUG
UAGCAGCACAGAAAUAUUGGCA	>bta-miR-658 MIMAT0009362	GGCGGAGGGAAGCGGGUCCGUUGGU
>bta-miR-450b MIMAT0024576	>bta-miR-2484 MIMAT0012077	GAGCUAUGAUGACUUUGAUUGCAU
UUUUGCAAUAUGUUCCUGAAUA	>bta-miR-2329-3p MIMAT0011859	UCUGUGAUGUGAGCUGAUAAGU
>bta-miR-2396 MIMAT0011949	>bta-miR-382 MIMAT0009308	GAAGUUGUUCGUGGUGGAUUCG
UCAUGCACUGGGGUCUUGAUGG	>bta-let-7i MIMAT0003851	UGAGGUAGUAGUUUGUGCUGUU
>bta-miR-2431-3p MIMAT0012002	>bta-miR-876 MIMAT0009380	UGGAUUUCUUUGUGAAUCACCA
CACCCCCACUUGCAUGACCCUGA	>bta-miR-2435 MIMAT0012007	AAACUCGAAUGAACUCUUUGGC
>bta-miR-31 MIMAT0003548	>bta-miR-2413 MIMAT0011975	UCGGACCCAGGGGGACUGCGGU
AGGCAAGAUGCUGGCAUAGCU	>bta-miR-2407 MIMAT0011965	CUGGGCGGAUGGGAAGGGCUGG
>bta-miR-3431 MIMAT0017394	>bta-miR-2470 MIMAT0012060	UUGUGUGGUUUUGGAUGUCUG
CCUCAGUCAGCCUUGUGGAUGU	>bta-miR-1388-5p MIMAT0013590	AGGACUGUCCAACCUGAGAAU
>bta-miR-224 MIMAT0009271	>bta-miR-1281 MIMAT0009962	UCGCCUCCUCCUCUCCC
CAAGUCACUAGUGGUUCCGUUUA	>bta-miR-759 MIMAT0009371	GCAGACUGCAAACAAUUUUGAC
>bta-miR-3120 MIMAT0024572	>bta-miR-432 MIMAT0009317	UCUUGGAGUAGGUCAUUGGGUGG
CACAGCAAGUGUAGACAGGCA	>bta-miR-2382-5p MIMAT0011930	AGGGGAGUGCCUGGGAAGCUGU
>bta-miR-200c MIMAT0003823	>bta-miR-2285r MIMAT0025575	AGAAACCUGGAUGAACUUUUUGG
UAAUACUGCCGGGUAAUGAUGGA	>bta-miR-2289 MIMAT0011796	UCGUGUUCGAGCUCGCGUCC
>bta-miR-2397-3p MIMAT0011952	>bta-miR-32 MIMAT0009283	UAUUGCACAUGACUAAGUUGCAU
CAGAGCAGUGGCAAGAACGCAU	>bta-miR-199a-3p MIMAT0003746	ACAGUAGUCUGCACAUUGGUUA
>bta-miR-503-3p MIMAT0025558	>bta-miR-2886 MIMAT0013844	AGCGCCGCCGGCCGCACC
GGAGUAUUGUUUCUGCUGCCCGG	>bta-miR-2284p MIMAT0011885	UGAAAGUUUGUUCGGGAUUUU
>bta-miR-2415-5p MIMAT0011978	>bta-miR-2349 MIMAT0011884	UGGCACUUCUGGUCUCAGACUCA
GGGAGUCGGUCCUGCCGGCCA	>bta-miR-2284g MIMAT0011847	AAAAGUUCGUUCGGCUUUUU
>bta-miR-219-3p MIMAT0012547	>bta-miR-7 MIMAT0003843	UGGAAGACUAGUGAUUUUGUUGUU
AGAAUUGUGGCUGGACAUCUG	>bta-miR-2425-3p MIMAT0011995	UUCGUAGACCCUGCCCUCCU
>bta-miR-17-5p MIMAT0003815	>bta-miR-129 MIMAT0009220	CUUUUUGCGGUCUGGGCUUGCU
CAAAGUGCUUACAGUGCAGGUAGU	>bta-miR-2891 MIMAT0013849	AUCUUUGGGCUAGGUUAGUU
>bta-miR-2416 MIMAT0011980	>bta-miR-2315 MIMAT0011835	AGCAGAAUUUUUGGAUACUGG
UGCAGUGCCCACUGUGGAAGAUG	>bta-miR-362-5p MIMAT0009298	AAUCCUUGGAACCUAGGUGUGAGU
>bta-miR-2305 MIMAT0011817	>bta-miR-9-3p MIMAT0012549	AUAAAGCUAGAUAACCG
CGGGGGUGGCGGGGAGGGGG	>bta-miR-2395 MIMAT0011948	CUGUUGGCAGCUCUCUCAGAC
>bta-miR-551b MIMAT0009348	>bta-miR-2356 MIMAT0011893	UCUUGUGAUGAGGGAGUCUGAGG
GGCGACCCAUACUUGGUUUCAG	>bta-miR-2359 MIMAT0011897	GAUUGUGUUGUUUUCUUUUU
>bta-miR-2333 MIMAT0011866	>bta-miR-6523a MIMAT0025552	UCUGGGGUAACUUUGAGCAGGG
GCAAUGCAGACUCCAGGGCCC	>bta-miR-2285e MIMAT0024580	AAACCUGAACGAACUUUUUGGC
>bta-miR-1343-5p MIMAT0011839	>bta-miR-6517 MIMAT0025528	UCAGGGUCCGUGAGCUCCUCGGC
UGGGGAGCGGCCCCCGGGCGGG	>bta-miR-2450c MIMAT0012028	CACGUCAGUAGAGGCGCGUGUG
>bta-miR-6534 MIMAT0025570	>bta-miR-2367-3p MIMAT0011910	UUGAAAGGCACUUACAGGAAG
UCUAAGAGCAGUCAGGACGGAU	>bta-miR-1843 MIMAT0011990	AAGCUUCGUGGUCUCUGUCUUGCC
>bta-miR-2451 MIMAT0012031	>bta-miR-1468 MIMAT0013592	CUCCGUUUGCCUGUUUUGCUGA
AUGAGGUGCUCUGGAGAGUGGA	>bta-miR-1247-3p MIMAT0025550	CGGGAACGUCGGGACUGGAGC
>bta-miR-1777a MIMAT0012032	>bta-miR-453 MIMAT0009325	AGGUUGUCCGUGGUGAGUUCGCA
UGGGGGCGGUGGGGGGCGGG	>bta-miR-15b MIMAT0003792	UAGCAGCACAUCAUGGUUUACA
>bta-miR-3660 MIMAT0025555	>bta-miR-2443 MIMAT0012018	UGAGGGCAGGACCGUAUGAGGUGU
ACUGACAGGAGAGCAUUUUAA	>bta-miR-2285ac MIMAT0030440	AAAACCUGAAGAGACUUUUUGG
>bta-miR-2331-3p MIMAT0011864	>bta-miR-2285g MIMAT0024582	AAACCUGAACAAGCUUUUUGG
ACCCUGCAGCCAAAGAAGCUA	>bta-miR-2473 MIMAT0012064	AAAUUGGCAGAGCUUCCUCUU
>bta-miR-2357 MIMAT0011894	>bta-miR-2296 MIMAT0011804	UGGACAACUGAGGUUCCUGCU
UUGGUCUGGCACAGAGCAUGUGAG	>bta-miR-2899 MIMAT0013857	AGGCGGGCCGGGGUUGGA
>bta-miR-488 MIMAT0009330	>bta-miR-2452 MIMAT0012033	GUGCUGUUUGUUUUCCUUUUUU
UUGAAAGGCUGUUUCUUGGUC	>bta-miR-2419-3p MIMAT0011986	CAGGCGGGUGCUAAUACGAUCA
>bta-miR-2338 MIMAT0011872	>bta-miR-150 MIMAT0003845	UCUCCCAACCCUUGUACCAGUGU
AGGCUGAGGACAGGGGCUGACGU	>bta-miR-6522 MIMAT0025540	UCGGAAUUGUUUGUGUACCUGU
>bta-miR-2474 MIMAT0012065	>bta-miR-2471-5p MIMAT0012061	GAGGAUCUGUCUAAUCUCAGAGG
UACCGGGCCAGCUGGAAGGAGA	>bta-miR-2285j MIMAT0024585	AAAAACCAGAACGAACUUUUUG
>bta-miR-2486-3p MIMAT0012082	>bta-miR-584 MIMAT0009352	UGGUUUGCCUGGGACUGAG
AAAUGAGGGGCAAAAUCUGUGUU	>bta-miR-6518 MIMAT0025536	UCACGGAGAGGAGAAACUGCAC
>bta-miR-2903 MIMAT0013861	>bta-miR-423-3p MIMAT0003831	AAGCUCGGUCUGAGGCCCCUCAGU
UUCCGCGCUCUACGCCAGC	>bta-miR-132 MIMAT0003812	UAACAGUCUACAGCCAUGGUCG
>bta-miR-2387 MIMAT0011939	>bta-miR-376a MIMAT0009946	AUCAUAGAGGAAAAUCCACGU
UGGAAGGCCUGGCUUUGCAGCG	>bta-miR-2381 MIMAT0011929	CAGGCUGCUCUGUGCUUGGCU
>bta-miR-4657 MIMAT0036970	>bta-miR-2368-5p MIMAT0011911	AGAGGGUGGCCUGGUAUCUG
AAUGUGGAAGUGGUCUGAGGCAU	>bta-miR-367 MIMAT0009299	GAAUUGCACUUUAGCAAUGGUGA
>bta-miR-490 MIMAT0009331	>bta-miR-345-3p MIMAT0012535	CCUGAACUAGGGGUCUGGAG
CAACCUGGAGGACUCCAUGCUG	>bta-miR-2325a MIMAT0011854	GUUUUGUUUGGGUUUUUUUC
>bta-miR-182 MIMAT0009244	>bta-miR-105a MIMAT0009217	UCAAAUGCUCAGACUCCUGUGGU
UUUGGCAAUGGUAGAACUCACACU	>bta-miR-2284r MIMAT0012010	UUGGCCCAAAAGUUCGUUCGGAU
>bta-miR-2335 MIMAT0011868	>bta-miR-99a-5p MIMAT0003537	AACCCGUAGAUCCGAUCUUGU
AGAUAAUGAUGACUAACUGAAU	>bta-miR-342 MIMAT0003846	UCUCACACAGAAAUCGCACCCAUCU
>bta-miR-874 MIMAT0009378	>bta-miR-2334 MIMAT0011867	ACAGCAGCCUGUGUUCUCACCU
CUGCCCUGGCCCGAGGGACCGA	>bta-miR-4444 MIMAT0036978	CUCGAGUUGGAAGAGGCG
>bta-miR-16b MIMAT0003525	>bta-miR-2353 MIMAT0011889	UAGCCUGCAGUACAGAGGACUGG
UAGCAGCACGUAAAUAUUGGC	>bta-miR-2386 MIMAT0011938	UGUUUGGUUUUUCGUUUUCC
>bta-miR-2350 MIMAT0011886	>bta-miR-664b MIMAT0030438	UAUUCAUUUAUCUCCCAGCCUAC
CAGCUCCUGUUUCUCUCCUCAG	>bta-miR-2320-5p MIMAT0011844	UGGCACAGGGUCCAGCUGUCGGC
>bta-miR-2284h-5p MIMAT0012019	>bta-miR-2312 MIMAT0011828	AAAACCUGAACGAACUUUUC
CCCAAAAGUUCGUUCGGGUUU	>bta-miR-214 MIMAT0003825	ACAGCAGGCACAGACAGGCAGU
>bta-miR-2284b MIMAT0011983	>bta-miR-181b MIMAT0003793	AACAUUCAUUGCUGUCGGUGGGUU
AAAAGUUCGUUUGGUUUUUUC	>bta-miR-763 MIMAT0009374	CCAGCUGGGAGGAACCAGUGGC
>bta-miR-144 MIMAT0009234	>bta-miR-433 MIMAT0009318	AUCAUGAUGGGCUCCUCGGUGU
UACAGUAUAGAUGAUGUACUAG	>bta-miR-423-5p MIMAT0012537	UGAGGGGCAGAGAGCGAGACUUU
>bta-miR-496 MIMAT0009336	>bta-miR-2424 MIMAT0011993	AGAUCUUUGGUAAUCUGAUGGCU
UGAGUAUUACAUGGCCAAUCUC	>bta-miR-873 MIMAT0009377	GCAGGAACUUGUGAGUCUCCU
>bta-miR-2890 MIMAT0013848	>bta-miR-2454-3p MIMAT0012036	UCUCCUCUGGCCGCUCUCCU
GCCCCGGCCGCUCCCGGCCU	>bta-miR-2306 MIMAT0011818	CAGGCCUGCCCAUCUAGGACAC
>bta-miR-2360 MIMAT0011898	>bta-miR-3601 MIMAT0016936	UCUCGUGACAUGAUGAUCCCCGA
CGGGCAGGAGGCUGGAGGCGUU	>bta-miR-2284j MIMAT0011827	GAAAAGUUCGUUCAGGUUUU
>bta-miR-2388-5p MIMAT0011940	>bta-miR-2441 MIMAT0012016	ACAGGACAGGACAGUGGGAG
AGCUCCCGUCUCCUCUGUGCUGA	>bta-miR-330 MIMAT0009290	GCAAAGCACACGGCCUGCAGAGA
>bta-miR-544b MIMAT0009345	>bta-miR-2284y MIMAT0024579	AAAAGUUCGUUCGGGUUUUUC
AUUCUGCAUUUCUAACAAGUUC	>bta-miR-219-5p MIMAT0009269	UGAUUGUCCAAACGCAAUUCUU
>bta-miR-27b MIMAT0003546	>bta-miR-2284s MIMAT0011811	UGGCCCAAAAGUUUGUUCGGAU
UUCACAGUGGCUAAGUUCUGC	>bta-miR-30e-5p MIMAT0003799	UGUAAACAUCCUUGACUGGAAGCU
>bta-miR-935 MIMAT0009385	>bta-miR-103 MIMAT0003521	AGCAGCAUUGUACAGGGCUAUGA
CCAGUUACCGCUUCCGCUACCGC	>bta-miR-219 MIMAT0030444	AGAGUUGAGUCUGGACGUCCCG
>bta-miR-193b MIMAT0009253	>bta-miR-126-3p MIMAT0003540	CGUACCGUGAGUAAUAAUGCG
AACUGGCCCACAAAGUCCCGCUUU	>bta-miR-301b MIMAT0009277	CAGUGCAAUGAUAUUGUCAAAGCAU
>bta-miR-7865 MIMAT0030450	>bta-miR-2331-5p MIMAT0011863	GGCUUCCGUGCCUGCAGAUGUCU
CAGGGAGGGCAGGGGAGGG	>bta-miR-2319b MIMAT0011843	UACUCUGUAUUAGGCACUUAG
>bta-miR-147 MIMAT0009237	>bta-miR-2885 MIMAT0013843	CGGCGGCAGCGCCGGGGCG
GUGUGCGGAAAUGCUUCUGCUA	>bta-miR-21-5p MIMAT0003528	UAGCUUAUCAGACUGAUGUUGACU
>bta-miR-2324 MIMAT0011853	>bta-miR-2461-5p MIMAT0012047	CCACUCUGUCUCGGAUCCUGGCA
UGGGGUUGGGGCAGUGUGGCUGU	>bta-miR-6120-5p MIMAT0024590	CUGUUCCCGUUUUUCACAUGUG
>bta-miR-339a MIMAT0009293	>bta-miR-1814a MIMAT0011874	AGGUUUUUUGGUUUUGUUUU
UCCCUGUCCUCCAGGAGCUCAC	>bta-miR-2358 MIMAT0011896	CCAAAUAGUUGGGAUCGUGGA
>bta-miR-424-5p MIMAT0013593	>bta-miR-206 MIMAT0009260	UGGAAUGUAAGGAAGUGUGUGG
CAGCAGCAAUUCAUGUUUUGA	>bta-miR-2385-5p MIMAT0011935	CUGGGGCAAGUGGAGUACGUU
>bta-miR-142-3p MIMAT0003791	>bta-miR-221 MIMAT0003529	AGCUACAUUGUCUGCUGGGUUU
AGUGUUUCCUACUUUAUGGAUG	>bta-miR-6524 MIMAT0025553	UUACUCUGAGUAACCUAACUG
>bta-miR-374b MIMAT0009302	>bta-miR-199b MIMAT0003821	CCCAGUGUUUAGACUAUCUGUUC
AUAUAAUACAACCUGCUAAGUG	>bta-miR-141 MIMAT0009232	UAACACUGUCUGGUAAAGAUGG
>bta-miR-2285o MIMAT0025530	>bta-miR-1225-3p MIMAT0009952	CCGAGCCCCUGUGCCGCCCCCAG
AAACCCGAACGAACUUUUGG	>bta-miR-2450d MIMAT0036977	CAUGGUCAGUAGAGGCGCAUGUG
>bta-miR-362-3p MIMAT0012548	>bta-miR-2432 MIMAT0012004	UCAGGAUUCUAGGCUUAGAGGU
AACACACCUAUUCAAGGAUUC	>bta-miR-2285i MIMAT0024584	AAAACCGGAACGAACUUUUUGG
>bta-miR-133a MIMAT0009225	>bta-miR-363 MIMAT0003855	AUUGCACGGUAUCCAUCUGCG
UUUGGUCCCCUUCAACCAGCUG	>bta-miR-2436-5p MIMAT0012008	CGGCGCAGCUGUCGGGAGGGCG
>bta-miR-658 MIMAT0009362	>bta-miR-486 MIMAT0009329	UCCUGUACUGAGCUGCCCCGAG
GGCGGAGGGAAGCGGGUCCGUUGGU	>bta-miR-149-3p MIMAT0024571	GAGGGAGGGACGGGGGCUGUGC
>bta-miR-2484 MIMAT0012077	>bta-miR-2482 MIMAT0012074	GUAGUUUUCUUUGUCGUUUU
GAGCUAUGAUGACUUUGAUUGCAU	>bta-miR-411b MIMAT0025541	UGGUCGACCAUAAAACGUACGU
>bta-miR-2329-3p MIMAT0011859	>bta-miR-19b MIMAT0004337	UGUGCAAAUCCAUGCAAAACUGA
UCUGUGAUGUGAGCUGAUAAGU	>bta-miR-95 MIMAT0009387	UUCAACGGGUAUUUAUUGAGCA
>bta-miR-382 MIMAT0009308	>bta-miR-2284i MIMAT0011792	GAGAAGUUCGUUCUGGUGUUU
GAAGUUGUUCGUGGUGGAUUCG	>bta-miR-1839 MIMAT0009968	AAGGUAGAUAGAACAGGUCUUGUU
>bta-let-7i MIMAT0003851	>bta-miR-208a MIMAT0009261	AUAAGACGAGCAAAAAGCUUGU
UGAGGUAGUAGUUUGUGCUGUU	>bta-miR-2376 MIMAT0011922	CCUCUGAGAUCUUGCUAGGCGCU
>bta-miR-876 MIMAT0009380	>bta-miR-1296 MIMAT0009964	UUAGGGCCCUGGCUCCAUCUCC
UGGAUUUCUUUGUGAAUCACCA	>bta-miR-2285l MIMAT0024587	AAAACCCGCAUGAACUUUUUGGC
>bta-miR-2435 MIMAT0012007	>bta-miR-2901 MIMAT0013859	CCGAGUGCUCCCGCGAGCGCU
AAACUCGAAUGAACUCUUUGGC	>bta-miR-128 MIMAT0003541	UCACAGUGAACCGGUCUCUUU
>bta-miR-2413 MIMAT0011975	>bta-miR-210 MIMAT0003824	ACUGUGCGUGUGACAGCGGCUGA
UCGGACCCAGGGGGACUGCGGU	>bta-miR-2464-3p MIMAT0012052	CUCCAGAGCUGAGCAGAACUG
>bta-miR-2407 MIMAT0011965	>bta-miR-2313-5p MIMAT0011829	AGUGCAGCUGAGGACCAAGGCA
CUGGGCGGAUGGGAAGGGCUGG	>bta-miR-452 MIMAT0009324	UGUUUGCAGAGGAAACUGAGAC
>bta-miR-2470 MIMAT0012060	>bta-miR-2285f MIMAT0024581	AAAACCUGAAUGAACUUUUUGG
UUGUGUGGUUUUGGAUGUCUG	>bta-miR-2285z MIMAT0029950	CCAGAAAGUUCAUUCAGGUCCU
>bta-miR-1388-5p MIMAT0013590	>bta-miR-2285c MIMAT0011950	AAACCUGAACAAACUUUUUGGC
AGGACUGUCCAACCUGAGAAU	>bta-miR-1282 MIMAT0009954	UCGUUUGCCUUUUUCUGCUU
>bta-miR-1281 MIMAT0009962	>bta-miR-20a MIMAT0003527	UAAAGUGCUUAUAGUGCAGGUAG
UCGCCUCCUCCUCUCCC	>bta-miR-92b MIMAT0009384	UAUUGCACUCGUCCCGGCCUCC
>bta-miR-759 MIMAT0009371	>bta-miR-6523b MIMAT0029951	CUGCUCAAAGUUACCCCAG
GCAGACUGCAAACAAUUUUGAC	>bta-miR-2896 MIMAT0013854	CGGCAGAUGAAGUCCAUC
>bta-miR-432 MIMAT0009317	>bta-miR-2417 MIMAT0011981	AGAUGGAGGCACUGAAAAUUU
UCUUGGAGUAGGUCAUUGGGUGG	>bta-miR-493 MIMAT0009333	UGAAGGUCUACUGUGUGCCAGG
>bta-miR-2382-5p MIMAT0011930	>bta-miR-2285af MIMAT0031057	GCCAAAAAGCUUGUUCAGGUU
AGGGGAGUGCCUGGGAAGCUGU	>bta-miR-545-3p MIMAT0003807	AUCAACAAACAUUUAUUGUGUG
>bta-miR-2285r MIMAT0025575	>bta-miR-188 MIMAT0009249	CAUCCCUUGCAUGGUGGAGGGU
AGAAACCUGGAUGAACUUUUUGG	>bta-miR-2341 MIMAT0011876	CAGUAGGUAGAAAGAAGGCUGA
>bta-miR-2289 MIMAT0011796	>bta-miR-2467-3p MIMAT0012057	GAGGGCAGUGAGGCUCAGGGCUG
UCGUGUUCGAGCUCGCGUCC	>bta-miR-2368-3p MIMAT0011912	ACUGUCAGACCACCUCUGCC
>bta-miR-32 MIMAT0009283	>bta-miR-185 MIMAT0009247	UGGAGAGAAAGGCAGUUCCUGA
UAUUGCACAUGACUAAGUUGCAU	>bta-miR-2337 MIMAT0011870	GUGGUUUCUUAUUCCUUUUU
>bta-miR-199a-3p MIMAT0003746	>bta-miR-615 MIMAT0009355	GGGGGUCCCCGGUGCUCGGAUC
ACAGUAGUCUGCACAUUGGUUA	>bta-miR-105b MIMAT0009216	UCAAAUGCUCAGACUCCUUGGU
>bta-miR-2886 MIMAT0013844	>bta-miR-2373-5p MIMAT0011918	CUUCCCCGGUCAGGGCUCGGC
AGCGCCGCCGGCCGCACC	>bta-miR-33a MIMAT0009294	GUGCAUUGUAGUUGCAUUGCA
>bta-miR-2284p MIMAT0011885	>bta-miR-2398 MIMAT0011953	AUCUAGGGACGCGUCGGCAACU
UGAAAGUUUGUUCGGGAUUUU	>bta-miR-2285h MIMAT0024583	GAAAACCGAAACGAACUUUAUG
>bta-miR-2349 MIMAT0011884	>bta-miR-340 MIMAT0009296	UCCGUCUCAGUUACUUUAUAGCC
UGGCACUUCUGGUCUCAGACUCA	>bta-miR-149-5p MIMAT0024570	UCUGGCUCCGUGUCUUCACUCCC
>bta-miR-2284g MIMAT0011847	>bta-miR-2408 MIMAT0011966	CACGUGUGUGAGCUCAGCCGG
AAAAGUUCGUUCGGCUUUUU	>bta-miR-1248 MIMAT0009972	ACCUUCUUGUAUAAGCACUGUGCUAAA
>bta-miR-7 MIMAT0003843	>bta-miR-2284t-3p MIMAT0011832	AAACUCGAAUGAAUGUUUUGGC
UGGAAGACUAGUGAUUUUGUUGUU	>bta-miR-1193 MIMAT0009965	UAGGUCACCCGUUUGACUAUC
>bta-miR-2425-3p MIMAT0011995	>bta-miR-499 MIMAT0003536	UUAAGACUUGCAGUGAUGUUU
UUCGUAGACCCUGCCCUCCU	>bta-miR-34a MIMAT0004340	UGGCAGUGUCUUAGCUGGUUGU
>bta-miR-129 MIMAT0009220	>bta-miR-2399-3p MIMAT0011955	UUCUAACAACUACAGAAAGUGU
CUUUUUGCGGUCUGGGCUUGCU	>bta-miR-124b MIMAT0013774	UAAGGCACGCGGUGAAUGCCAAG
>bta-miR-2891 MIMAT0013849	>bta-miR-324 MIMAT0009285	CGCAUCCCCUAGGGCAUUGGUGU
AUCUUUGGGCUAGGUUAGUU	>bta-miR-376d MIMAT0010199	AUCAUAGAGGAAAAUCCACAU
>bta-miR-2315 MIMAT0011835	>bta-miR-764 MIMAT0009948	GGUGCUCACUCGUCCUUCU
AGCAGAAUUUUUGGAUACUGG	>bta-miR-378b MIMAT0025535	ACUUGACUUGGAGUCAGAAGGC
>bta-miR-362-5p MIMAT0009298	>bta-miR-26a MIMAT0003516	UUCAAGUAAUCCAGGAUAGGCU
AAUCCUUGGAACCUAGGUGUGAGU	>bta-miR-2294 MIMAT0011802	GAGGCUGUAGAGGGCAUCUGCU
>bta-miR-9-3p MIMAT0012549	>bta-miR-1306 MIMAT0009974	CCACCUCCCCUGCAAACGUCC
AUAAAGCUAGAUAACCG	>bta-miR-2328-5p MIMAT0011857	GCCCCCUCCCUUGGUCGCCGG
>bta-miR-2395 MIMAT0011948	>bta-miR-181a MIMAT0003543	AACAUUCAACGCUGUCGGUGAGUU
CUGUUGGCAGCUCUCUCAGAC	>bta-miR-383 MIMAT0009309	AGAUCAGAAGGUGAUUGUGGCU
>bta-miR-2356 MIMAT0011893	>bta-miR-2321 MIMAT0011848	UGUCGGUUGGUUUUUGUUUG
UCUUGUGAUGAGGGAGUCUGAGG	>bta-miR-543 MIMAT0009344	AAACAUUCGCGGUGCACUUCUU
>bta-miR-2359 MIMAT0011897	>bta-miR-500 MIMAT0009337	UAAUCCUUGCUACCUGGGUGAGA
GAUUGUGUUGUUUUCUUUUU	>bta-miR-2371 MIMAT0011916	UAUAGUUUUGUGUGGUUUUU
>bta-miR-6523a MIMAT0025552	>bta-miR-2373-3p MIMAT0011919	CGAGCCCGGCACGUGGAAGAGCC
UCUGGGGUAACUUUGAGCAGGG	>bta-miR-200a MIMAT0003822	UAACACUGUCUGGUAACGAUGUU
>bta-miR-2285e MIMAT0024580	>bta-miR-375 MIMAT0009303	UUUUGUUCGUUCGGCUCGCGUGA
AAACCUGAACGAACUUUUUGGC	>bta-miR-2423 MIMAT0011992	UUGUGUGGUUGUUGUUUUCCU
>bta-miR-6517 MIMAT0025528	>bta-miR-7858 MIMAT0030433	ACGCAAUUCUUCAAAAUCUUAGC
UCAGGGUCCGUGAGCUCCUCGGC	>bta-miR-205 MIMAT0003545	UCCUUCAUUCCACCGGAGUCUG
>bta-miR-2450c MIMAT0012028	>bta-miR-106b MIMAT0009218	UAAAGUGCUGACAGUGCAGAU
CACGUCAGUAGAGGCGCGUGUG	>bta-miR-3602 MIMAT0016937	GUGUUGGGAUCACCGCGGUAA
>bta-miR-2367-3p MIMAT0011910	>bta-miR-2383 MIMAT0011932	CUGAGUGAUGACUGCUGACC
UUGAAAGGCACUUACAGGAAG	>bta-miR-96 MIMAT0009388	UUUGGCACUAGCACAUUUUUGCU
>bta-miR-1843 MIMAT0011990	>bta-miR-2378 MIMAT0011924	UGUGGGUUGUCUGAGCAAGGG
AAGCUUCGUGGUCUCUGUCUUGCC	>bta-miR-378c MIMAT0025551	ACUGGACUUGGAGUCAGAAGU
>bta-miR-1468 MIMAT0013592	>bta-miR-1284 MIMAT0009955	UCUGCACAGACCCUGGCUUUUC
CUCCGUUUGCCUGUUUUGCUGA	>bta-miR-127 MIMAT0003787	UCGGAUCCGUCUGAGCUUGGCU
>bta-miR-1247-3p MIMAT0025550	>bta-miR-1434-5p MIMAT0012039	GUACAUGAUGACUAAAAUUUCU
CGGGAACGUCGGGACUGGAGC	>bta-miR-222 MIMAT0003530	AGCUACAUCUGGCUACUGGGU
>bta-miR-453 MIMAT0009325	>bta-miR-99b MIMAT0004345	CACCCGUAGAACCGACCUUGCG
AGGUUGUCCGUGGUGAGUUCGCA	>bta-miR-545-5p MIMAT0003806	UCAGUAAAUGUUUAUUGGAUG
>bta-miR-15b MIMAT0003792	>bta-miR-2405 MIMAT0011963	UGUGUGGUUUGUUUGGCCUC
UAGCAGCACAUCAUGGUUUACA	>bta-miR-2379 MIMAT0011925	AGGCUGCUGGAGAAGAUAUUUU
>bta-miR-2443 MIMAT0012018	>bta-miR-2285k MIMAT0024586	AAAACCGGAAUGAACUUUUUG
UGAGGGCAGGACCGUAUGAGGUGU	>bta-miR-760-3p MIMAT0022951	CGGCUCUGGGUCUGUGGGGA
>bta-miR-2285ac MIMAT0030440	>bta-miR-9-5p MIMAT0009389	UCUUUGGUUAUCUAGCUGUAUG
AAAACCUGAAGAGACUUUUUGG	>bta-miR-2442 MIMAT0012017	AGAGCAGGGGCUGUGGGCUGCA
>bta-miR-2285g MIMAT0024582	>bta-miR-2320-3p MIMAT0011845	UCGAUGAUGGUCCCUGUGUUUU
AAACCUGAACAAGCUUUUUGG	>bta-miR-2319a MIMAT0011842	CUACUCUGUAUUAGGCACUUAG
>bta-miR-2473 MIMAT0012064	>bta-miR-2431-5p MIMAT0012001	CAGGUCAUAUAAGUGUGGAGUU
AAAUUGGCAGAGCUUCCUCUU	>bta-miR-2285t MIMAT0025577	AGAAUCUGGAUGAACUUUUUGG
>bta-miR-2296 MIMAT0011804	>bta-miR-1603 MIMAT0011823	GUGGUUUGUUUUGUGUUUUU
UGGACAACUGAGGUUCCUGCU	>bta-miR-411a MIMAT0009312	AUAGUAGACCGUAUAGCGUACG
>bta-miR-2899 MIMAT0013857	>bta-miR-3533 MIMAT0036975	AUGAAGUGUGACGUGGACAU
AGGCGGGCCGGGGUUGGA	>bta-miR-2472 MIMAT0012063	UCAGGGUUUGGGAUUCAGGUGC
>bta-miR-2452 MIMAT0012033	>bta-miR-2466-5p MIMAT0012054	CUGAGUCCGGUGGGGCAGUGUGU
GUGCUGUUUGUUUUCCUUUUUU	>bta-miR-2284aa MIMAT0025560	AAAAAAGUUUGUUUGGGUUUU
>bta-miR-2419-3p MIMAT0011986	>bta-miR-2904 MIMAT0013862	GGGAGCCUCGGUUGGCCUC
CAGGCGGGUGCUAAUACGAUCA	>bta-miR-2444 MIMAT0012021	UUUGUGUUGUUUUUUGUUUU
>bta-miR-150 MIMAT0003845	>bta-miR-2352 MIMAT0011888	AAACUGAAAGAACAGGAUUGCUG
UCUCCCAACCCUUGUACCAGUGU	>bta-miR-2453 MIMAT0012034	UCCUCAGGGCAGGAAGUGCGCAG
>bta-miR-6522 MIMAT0025540	>bta-miR-6519 MIMAT0025537	UAGCAGCGGGAACAGAGAAA
UCGGAAUUGUUUGUGUACCUGU	>bta-miR-487b MIMAT0003847	AAUCGUACAGGGUCAUCCACUU
>bta-miR-2471-5p MIMAT0012061	>bta-miR-217 MIMAT0009267	UACUGCAUCAGGAACUGAUUGGAU
GAGGAUCUGUCUAAUCUCAGAGG	>bta-miR-1271 MIMAT0009975	CUUGGCACCUAGUAAGUACUCA
>bta-miR-2285j MIMAT0024585	>bta-miR-448 MIMAT0009319	UUGCAUAUGUAGGAUGUCCCAU
AAAAACCAGAACGAACUUUUUG	>bta-miR-181d MIMAT0009243	AACAUUCAUUGUUGUCGGUGGGU
>bta-miR-584 MIMAT0009352	>bta-miR-6121-5p MIMAT0024592	UCGGAGCGCCCUCGCCAGAC
UGGUUUGCCUGGGACUGAG	>bta-miR-1584-5p MIMAT0011969	UUGGGGCUGGGCUGGGGGCA
>bta-miR-6518 MIMAT0025536	>bta-miR-2329-5p MIMAT0011860	ACUUAUCAGCUCACAUCACAGA
UCACGGAGAGGAGAAACUGCAC	>bta-miR-29a MIMAT0003518	CUAGCACCAUCUGAAAUCGGUUA
>bta-miR-423-3p MIMAT0003831	>bta-miR-135a MIMAT0009228	UAUGGCUUUUUAUUCCUAUGUGA
AAGCUCGGUCUGAGGCCCCUCAGU	>bta-miR-2390 MIMAT0011943	GUUGUGUGUUUUUGUUUUCC
>bta-miR-132 MIMAT0003812	>bta-miR-216b MIMAT0009266	AAAUCUCUGCAGGCAAAUGUGA
UAACAGUCUACAGCCAUGGUCG	>bta-miR-3613b MIMAT0029948	GAACAAAAAAAAAAGUACAAC
>bta-miR-376a MIMAT0009946	>bta-miR-204 MIMAT0004338	UUCCCUUUGUCAUCCUAUGCCU
AUCAUAGAGGAAAAUCCACGU	>bta-miR-665 MIMAT0009363	ACCAGUAGGCCGAGGCCCCU
>bta-miR-2381 MIMAT0011929	>bta-miR-2285q MIMAT0025574	AAGGACCUGAAUGAACUUUCUGG
CAGGCUGCUCUGUGCUUGGCU	>bta-miR-137 MIMAT0009231	UUAUUGCUUAAGAAUACGCGUAG
>bta-miR-2368-5p MIMAT0011911	>bta-miR-758 MIMAT0009370	UUUGUGACCUGGUCCACUAACC
AGAGGGUGGCCUGGUAUCUG	>bta-miR-187 MIMAT0009248	UCGUGUCUUGUGUUGCAGCCGG
>bta-miR-367 MIMAT0009299	>bta-miR-151-3p MIMAT0003524	CUAGACUGAAGCUCCUUGAGG
GAAUUGCACUUUAGCAAUGGUGA	>bta-miR-2293 MIMAT0011801	UGAUUUUGUUGUUUUGUAUU
>bta-miR-345-3p MIMAT0012535	>bta-miR-28 MIMAT0009272	AAGGAGCUCACAGUCUAUUGAG
CCUGAACUAGGGGUCUGGAG	>bta-miR-335 MIMAT0009291	UCAAGAGCAAUAACGAAAAAUGU
>bta-miR-2325a MIMAT0011854	>bta-miR-2426 MIMAT0011996	AAGGAAGUGGCUUGGGGAAAG
GUUUUGUUUGGGUUUUUUUC	>bta-miR-2304 MIMAT0011816	GGUUGUGUGGUUGUGUGUGU
>bta-miR-105a MIMAT0009217	>bta-miR-2300b-3p MIMAT0011810	GGGAGACAAAACUAGCUGAGGA
UCAAAUGCUCAGACUCCUGUGGU	>bta-miR-664a MIMAT0012078	CAGGCUGGGGUGUGUGUGGAUG
>bta-miR-2284r MIMAT0012010	>bta-miR-3596 MIMAT0016940	AACCACACAACCUACUACCUCA
UUGGCCCAAAAGUUCGUUCGGAU	>bta-miR-2897 MIMAT0013855	GGUGGGAGGGUCCCACCGAG
>bta-miR-99a-5p MIMAT0003537	>bta-miR-100 MIMAT0009215	AACCCGUAGAUCCGAACUUGUG
AACCCGUAGAUCCGAUCUUGU	>bta-miR-2483-5p MIMAT0012075	CGUCAACCAUCCAGCUGUUUGA
>bta-miR-342 MIMAT0003846	>bta-miR-99a-3p MIMAT0012533	CAAGCUCGCUUCUAUGGGU
UCUCACACAGAAAUCGCACCCAUCU	>bta-miR-6536 MIMAT0025572	UUUAAGUAUACGAUGAACUGC
>bta-miR-2334 MIMAT0011867	>bta-miR-3064 MIMAT0036974	UUGCCACACUGCAACACCUUACA
ACAGCAGCCUGUGUUCUCACCU	>bta-miR-2418 MIMAT0011982	UGGGAUGAGUGUGGCGUGGUCG
>bta-miR-4444 MIMAT0036978	>bta-miR-671 MIMAT0009365	AGGAAGCCCUGGAGGGGCUGGAG
CUCGAGUUGGAAGAGGCG	>bta-miR-2354 MIMAT0011890	UAGUAGGUUGUGUUGUUUAGU
>bta-miR-2353 MIMAT0011889	>bta-miR-1584-3p MIMAT0011970	CUCUCUCCGCAGACCUCAGCCG
UAGCCUGCAGUACAGAGGACUGG	>bta-miR-2385-3p MIMAT0011936	AAGUACUCGCCCUGUCUCAGUA
>bta-miR-2386 MIMAT0011938	>bta-miR-2365 MIMAT0011903	AGUUUUUGCUGUUUCUUAUC
UGUUUGGUUUUUCGUUUUCC	>bta-miR-1249 MIMAT0009976	ACGCCCUUCCCCCCCUUCUUCA
>bta-miR-664b MIMAT0030438	>bta-miR-541 MIMAT0009343	UGGUGGGCACAGAAUCCGGCCU
UAUUCAUUUAUCUCCCAGCCUAC	>bta-miR-2471-3p MIMAT0012062	UCUGAUGAAGACAGCCCUGCU
>bta-miR-2320-5p MIMAT0011844	>bta-miR-2465 MIMAT0012053	UGAGCCACAGUAGAGCCUUGGAU
UGGCACAGGGUCCAGCUGUCGGC	>bta-miR-2409 MIMAT0011967	UCUCACAUGGACGCUGCCCU
>bta-miR-2312 MIMAT0011828	>bta-miR-140 MIMAT0003789	UACCACAGGGUAGAACCACGGA
AAAACCUGAACGAACUUUUC	>bta-miR-126-5p MIMAT0004328	CAUUAUUACUUUUGGUACGCG
>bta-miR-214 MIMAT0003825	>bta-miR-2322-3p MIMAT0011851	AUGAGGAUGGACUUAGCUUUCG
ACAGCAGGCACAGACAGGCAGU	>bta-miR-2322-5p MIMAT0011850	AAGAAAGCGAAGUCCAUCCUCAU
>bta-miR-181b MIMAT0003793	>bta-miR-2489 MIMAT0011825	AAAUGACAGGGGACAUGAGUUU
AACAUUCAUUGCUGUCGGUGGGUU	>bta-let-7c MIMAT0004332	UGAGGUAGUAGGUUGUAUGGUU
>bta-miR-763 MIMAT0009374	>bta-miR-1246 MIMAT0024567	AAUGGAUUUUUGGAGCAGG
CCAGCUGGGAGGAACCAGUGGC	>bta-miR-376c MIMAT0009947	GUGGAUAUUCCUUCUAUGUUUA
>bta-miR-433 MIMAT0009318	>bta-miR-6529a MIMAT0025565	GAGAGAUCAGAGGCGCAGAGU
AUCAUGAUGGGCUCCUCGGUGU	>bta-miR-2404 MIMAT0011961	UUGCACUGCAUGGUAUCUGC
>bta-miR-423-5p MIMAT0012537	>bta-miR-502b MIMAT0009339	AAUCCACCUGGGCAAGGAUUC
UGAGGGGCAGAGAGCGAGACUUU	>bta-miR-2284f MIMAT0011905	AAAGUUCGUUCGGAUUUUUC
>bta-miR-2424 MIMAT0011993	>bta-miR-29b MIMAT0003828	UAGCACCAUUUGAAAUCAGUGUU
AGAUCUUUGGUAAUCUGAUGGCU	>bta-miR-2285ad MIMAT0030446	AAAACCCAAAUGAACUUUUUGG
>bta-miR-873 MIMAT0009377	>bta-miR-369-5p MIMAT0003801	AUCGACCGUGUUAUAUUCGC
GCAGGAACUUGUGAGUCUCCU	>bta-miR-2475 MIMAT0012066	UGAAGUGUGUGAAACUGCAGCGG
>bta-miR-2454-3p MIMAT0012036	>bta-miR-1307 MIMAT0009969	ACUCGGCGUGGCGUCGGUCGUG
UCUCCUCUGGCCGCUCUCCU	>bta-miR-3141 MIMAT0024573	GAGGGCGGGUGGAGGAGG
>bta-miR-2306 MIMAT0011818	>bta-miR-2292 MIMAT0011800	GAGUCUGAGAUUGAGGAAGGCA
CAGGCCUGCCCAUCUAGGACAC	>bta-miR-2285s MIMAT0025576	AAGACCCAAGUGAACUCUUUGG
>bta-miR-3601 MIMAT0016936	>bta-miR-2448-5p MIMAT0012025	CUGCGGAUACAACCAAACACGG
UCUCGUGACAUGAUGAUCCCCGA	>bta-miR-1298 MIMAT0009970	UUCAUUCGGCUGUCCAGAUGUA
>bta-miR-2284j MIMAT0011827	>bta-miR-1301 MIMAT0009958	UUGCAGCUGCCUAGGAGUGAUUUC
GAAAAGUUCGUUCAGGUUUU	>bta-miR-6121-3p MIMAT0024593	CCGGAUGAUGGACACUGAGG
>bta-miR-2441 MIMAT0012016	>bta-miR-2384 MIMAT0011933	AACUGUACUGGAAGGAUGGAUGG
ACAGGACAGGACAGUGGGAG	>bta-miR-329a MIMAT0009288	AACACACCUGGUUAACCUUUUU
>bta-miR-330 MIMAT0009290	>bta-miR-2284u MIMAT0011895	AAAAGUUCGUUCGGUUUUUCU
GCAAAGCACACGGCCUGCAGAGA	>bta-miR-2310 MIMAT0011822	GUUUUGUUUGGGUUUGUUUCU
>bta-miR-2284y MIMAT0024579	>bta-miR-10b MIMAT0003839	UACCCUGUAGAACCGAAUUUGUG
AAAAGUUCGUUCGGGUUUUUC	>bta-miR-191 MIMAT0003819	CAACGGAAUCCCAAAAGCAGCUG
>bta-miR-219-5p MIMAT0009269	>bta-miR-33b MIMAT0009295	GUGCAUUGCUGUUGCAUUGC
UGAUUGUCCAAACGCAAUUCUU	>bta-miR-2480 MIMAT0012072	AUUGUAUUGUUUCUUAUGAC
>bta-miR-2284s MIMAT0011811	>bta-miR-106a MIMAT0003784	AAAAGUGCUUACAGUGCAGGUA
UGGCCCAAAAGUUUGUUCGGAU	>bta-miR-365-3p MIMAT0004341	UAAUGCCCCUAAAAAUCCUUAU
>bta-miR-30e-5p MIMAT0003799	>bta-miR-2285w MIMAT0029945	ACCAAAAGUUCAUUCAGAUUU
UGUAAACAUCCUUGACUGGAAGCU	>bta-miR-15a MIMAT0004334	UAGCAGCACAUAAUGGUUUGU
>bta-miR-103 MIMAT0003521	>bta-miR-1777b MIMAT0012046	GGGGGCGGUGGGGGGCGGGG
AGCAGCAUUGUACAGGGCUAUGA	>bta-miR-539 MIMAT0009342	GGAGAAAUUAUCCUUGGUGUGU
>bta-miR-219 MIMAT0030444	>bta-miR-196a MIMAT0009255	UAGGUAGUUUCAUGUUGUUGGG
AGAGUUGAGUCUGGACGUCCCG	>bta-miR-2456 MIMAT0012041	ACGCACUGUCCUGGGAAGUGG
>bta-miR-126-3p MIMAT0003540	>bta-miR-320b MIMAT0011991	AGCUGGGUUGAGAGGGUGGU
CGUACCGUGAGUAAUAAUGCG	>bta-miR-378d MIMAT0036972	CUGGACUUGGAGUCAGAAGACC
>bta-miR-301b MIMAT0009277	>bta-miR-6527 MIMAT0025561	CACGUGGACGAAGAGAUGGGA
CAGUGCAAUGAUAUUGUCAAAGCAU	>bta-miR-497 MIMAT0004343	CAGCAGCACACUGUGGUUUGUA
>bta-miR-2331-5p MIMAT0011863	>bta-miR-2336 MIMAT0011869	CUAACCGUAACUUUGAAGUGCU
GGCUUCCGUGCCUGCAGAUGUCU	>bta-miR-125a MIMAT0003538	UCCCUGAGACCCUUUAACCUGUG
>bta-miR-2319b MIMAT0011843	>bta-miR-2437 MIMAT0012011	UGUGGUUUUUUGUUUUCCUUU
UACUCUGUAUUAGGCACUUAG	>bta-miR-18a MIMAT0003526	UAAGGUGCAUCUAGUGCAGAUA
>bta-miR-2885 MIMAT0013843	>bta-miR-181c MIMAT0003817	AACAUUCAACCUGUCGGUGAGUUU
CGGCGGCAGCGCCGGGGCG	>bta-miR-2462 MIMAT0012049	AAAGGAUUGGCUGAAUUGUAG
>bta-miR-21-5p MIMAT0003528	>bta-miR-6122-3p MIMAT0024595	ACUAUAUGAUGUAAACUGAAC
UAGCUUAUCAGACUGAUGUUGACU	>bta-miR-431 MIMAT0009316	UGUCUUGCAGGCCGUCAUGCAGG
>bta-miR-2461-5p MIMAT0012047	>bta-miR-216a MIMAT0009265	UAAUCUCAGCUGGCAACUGUGA
CCACUCUGUCUCGGAUCCUGGCA	>bta-miR-30c MIMAT0003850	UGUAAACAUCCUACACUCUCAGC
>bta-miR-6120-5p MIMAT0024590	>bta-miR-411c-5p MIMAT0025545	GGUUGAUCAGAGAACAUACAUU
CUGUUCCCGUUUUUCACAUGUG	>bta-miR-2345 MIMAT0011880	GUUGUGUGUUUUCUUAUUUC
>bta-miR-1814a MIMAT0011874	>bta-miR-296-5p MIMAT0026918	GAGGGCCCCCCCCAAUCCU
AGGUUUUUUGGUUUUGUUUU	>bta-miR-6531 MIMAT0025567	UAGACUUGGUGUACUUUGAGAGA
>bta-miR-2358 MIMAT0011896	>bta-miR-2488 MIMAT0012084	AUGUUGAUCCUAUUCCCUCU
CCAAAUAGUUGGGAUCGUGGA	>bta-miR-485 MIMAT0009328	AGAGGCUGGCCGUGAUGAAUUCG
>bta-miR-206 MIMAT0009260	>bta-miR-582 MIMAT0009351	UUACAGUUGUUCAACCAGUUACU
UGGAAUGUAAGGAAGUGUGUGG	>bta-miR-17-3p MIMAT0003816	ACUGCAGUGAAGGCACUUGU
>bta-miR-2385-5p MIMAT0011935	>bta-miR-148b MIMAT0003814	UCAGUGCAUCACAGAACUUUGU
CUGGGGCAAGUGGAGUACGUU	>bta-miR-2297 MIMAT0011805	CACUCUUUUUUCUUAUUCCU
>bta-miR-221 MIMAT0003529	>bta-miR-542-5p MIMAT0013594	UCGGGGAUCAUCAUGUCACGAG
AGCUACAUUGUCUGCUGGGUUU	>bta-miR-331-3p MIMAT0004339	GCCCCUGGGCCUAUCCUAGAA
>bta-miR-6524 MIMAT0025553	>bta-miR-6119-5p MIMAT0024588	AGAGGUAAAAAAUUGAUUUGACU
UUACUCUGAGUAACCUAACUG	>bta-miR-2455 MIMAT0012037	UCUGUGCUCGGGGAGGCAGGGA
>bta-miR-199b MIMAT0003821	>bta-miR-152 MIMAT0009238	UCAGUGCAUGACAGAACUUGGG
CCCAGUGUUUAGACUAUCUGUUC	>bta-miR-1721 MIMAT0011849	CACAGAUGAUGUGAUUCUGAGA
>bta-miR-141 MIMAT0009232	>bta-miR-143 MIMAT0009233	UGAGAUGAAGCACUGUAGCUCG
UAACACUGUCUGGUAAAGAUGG	>bta-miR-449c MIMAT0009322	AGGCAGUGCAUCUCUAGCUGG
>bta-miR-1225-3p MIMAT0009952	>bta-miR-2449 MIMAT0012027	UGGGCAGGAGACAGCAGGGC
CCGAGCCCCUGUGCCGCCCCCAG	>bta-miR-107 MIMAT0003785	AGCAGCAUUGUACAGGGCUAUC
>bta-miR-2450d MIMAT0036977	>bta-miR-2374 MIMAT0011920	UUGGGGCUGGGGAGAGGCGGG
CAUGGUCAGUAGAGGCGCAUGUG	>bta-miR-2458 MIMAT0012043	AUUGGAAAGAGUAAGCUGGUGU
>bta-miR-2432 MIMAT0012004	>bta-miR-133c MIMAT0029949	AUUUGGUUCCAUUUUACCAGC
UCAGGAUUCUAGGCUUAGAGGU	>bta-miR-655 MIMAT0009360	AUAAUACAUGGUUAACCUCUCU
>bta-miR-2285i MIMAT0024584	>bta-miR-532 MIMAT0003848	CAUGCCUUGAGUGUAGGACCGU
AAAACCGGAACGAACUUUUUGG	>bta-miR-2478 MIMAT0012070	GUAUCCCACUUCUGACACCA
>bta-miR-363 MIMAT0003855	>bta-miR-2285a MIMAT0011797	AAAAACUGAAUGAAAUUCUUGG
AUUGCACGGUAUCCAUCUGCG	>bta-miR-190b MIMAT0009252	UGAUAUGUUUGAUAUUGGGUU
>bta-miR-2436-5p MIMAT0012008	>bta-miR-628 MIMAT0009356	AUGCUGACAUAUUUACUAGAGG
CGGCGCAGCUGUCGGGAGGGCG	>bta-miR-6526 MIMAT0025556	UCCUGUGCCUCGAAUGGGUAUG
>bta-miR-486 MIMAT0009329	>bta-miR-129-5p MIMAT0009221	CUUUUUGCGGUCUGGGCUUGCU
UCCUGUACUGAGCUGCCCCGAG	>bta-miR-218 MIMAT0003798	UUGUGCUUGAUCUAACCAUGUG
>bta-miR-149-3p MIMAT0024571	>bta-miR-136 MIMAT0009230	ACUCCAUUUGUUUUGAUGAUGGA
GAGGGAGGGACGGGGGCUGUGC	>bta-miR-370 MIMAT0009300	GCCUGCUGGGGUGGAACCUGGU
>bta-miR-2482 MIMAT0012074	>bta-miR-744 MIMAT0009369	UGCGGGGCUAGGGCUAACAGCA
GUAGUUUUCUUUGUCGUUUU	>bta-miR-767 MIMAT0009375	UGCACCAUGGUUGUCUGAGCAUG
>bta-miR-411b MIMAT0025541	>bta-miR-2284k MIMAT0011907	GAAAAGUUCGGUCGGGUUUUU
UGGUCGACCAUAAAACGUACGU	>bta-miR-2287 MIMAT0011794	CUGGGACUGGUGGCAGCACUU
>bta-miR-19b MIMAT0004337	>bta-miR-142-5p MIMAT0003790	CAUAAAGUAGAAAGCACUAC
UGUGCAAAUCCAUGCAAAACUGA	>bta-miR-299 MIMAT0009274	UGGUUUACCGUCCCACAUACAU
>bta-miR-95 MIMAT0009387	>bta-miR-2883 MIMAT0013841	CUUCCCGUGUGUUGAGCC
UUCAACGGGUAUUUAUUGAGCA	>bta-miR-2343 MIMAT0011878	AAGGGGAGACGGUGGAACUUAU
>bta-miR-2284i MIMAT0011792	>bta-miR-2364 MIMAT0011902	UCUCUGUGGAUGGAUGUGGGCAG
GAGAAGUUCGUUCUGGUGUUU	>bta-miR-130a MIMAT0009223	CAGUGCAAUGUUAAAAGGGCAU
>bta-miR-1839 MIMAT0009968	>bta-miR-29d-5p MIMAT0026919	UGACCGAUUUCUCCUGGUGUU
AAGGUAGAUAGAACAGGUCUUGUU	>bta-miR-212 MIMAT0009264	ACCUUGGCUCUAGACUGCUUACU
>bta-miR-208a MIMAT0009261	>bta-miR-2894 MIMAT0013852	AGCCCUGGCCCUGCCAUCGUG
AUAAGACGAGCAAAAAGCUUGU	>bta-miR-29e MIMAT0009953	UAGCAUCAUUUGAAAUCAGUGUUU
>bta-miR-2376 MIMAT0011922	>bta-miR-424-3p MIMAT0015304	CAAAACGUGAGGCGCUGCUAU
CCUCUGAGAUCUUGCUAGGCGCU	>bta-miR-7862 MIMAT0030442	UGGUGCUCCCUGGAGCUGAGC
>bta-miR-1296 MIMAT0009964	>bta-miR-151-5p MIMAT0003523	UCGAGGAGCUCACAGUCUAGU
UUAGGGCCCUGGCUCCAUCUCC	>bta-miR-4286 MIMAT0024575	ACCCCACUCCUGGUACC
>bta-miR-2285l MIMAT0024587	>bta-miR-454 MIMAT0009326	UAGUGCAAUAUUGCUUAUAGGGU
AAAACCCGCAUGAACUUUUUGGC	>bta-miR-2392 MIMAT0011945	AUGGAUGGGGGUGAGGGGUGCA
>bta-miR-2901 MIMAT0013859	>bta-miR-27a-5p MIMAT0012532	AGGGCUUAGCUGCUUGUGAGCA
CCGAGUGCUCCCGCGAGCGCU	>bta-let-7b MIMAT0004331	UGAGGUAGUAGGUUGUGUGGUU
>bta-miR-128 MIMAT0003541	>bta-miR-2902 MIMAT0013860	GUGGCUGUCCCUGGAGGUGGG
UCACAGUGAACCGGUCUCUUU	>bta-miR-2438 MIMAT0012012	UGGGGUGUGUGCUGGAGCCUGCU
>bta-miR-210 MIMAT0003824	>bta-miR-199c MIMAT0011871	UACAGUAGUCUGCACAUUGG
ACUGUGCGUGUGACAGCGGCUGA	>bta-miR-18b MIMAT0003517	UAAGGUGCAUCUAGUGCAGUUA
>bta-miR-2464-3p MIMAT0012052	>bta-miR-1291 MIMAT0009956	UGGCCCUGACUGAAGACCUGCAGU
CUCCAGAGCUGAGCAGAACUG	>bta-miR-2344 MIMAT0011879	GCACGAUGAUGGCGGAUCUGAGUU
>bta-miR-2313-5p MIMAT0011829	>bta-miR-484 MIMAT0003535	UCAGGCUCAGUCCCCUCCCGAU
AGUGCAGCUGAGGACCAAGGCA	>bta-miR-2469 MIMAT0012059	UUACUGUAGGGCCUGCGGCUU
>bta-miR-452 MIMAT0009324	>bta-miR-2311 MIMAT0011826	UACUGAAACUGUGCUCGUGGUGU
UGUUUGCAGAGGAAACUGAGAC	>bta-miR-2323 MIMAT0011852	UGACCUGAUCAUGCUUACUGAGC
>bta-miR-2285f MIMAT0024581	>bta-miR-2284e MIMAT0012080	AAGUUCGUUCGGAUUUUUCC
AAAACCUGAAUGAACUUUUUGG	>bta-miR-2291 MIMAT0011799	GCUGAUAGUGAGCGACUGGGGCAG
>bta-miR-2285z MIMAT0029950	>bta-miR-2299-3p MIMAT0011808	UCCGGGGAAUGGAUCCAGCGU
CCAGAAAGUUCAUUCAGGUCCU	>bta-miR-409a MIMAT0009310	AGGUUACCCGAGCAACUUUGCAU
>bta-miR-2285c MIMAT0011950	>bta-miR-455-5p MIMAT0003835	UAUGUGCCUUUGGACUACAUC
AAACCUGAACAAACUUUUUGGC	>bta-miR-940 MIMAT0009386	AAGGCUGGGCCCCCGCUCCGC
>bta-miR-1282 MIMAT0009954	>bta-miR-202 MIMAT0009259	UUCCUAUGCAUAUACUUCUUU
UCGUUUGCCUUUUUCUGCUU	>bta-miR-2477 MIMAT0012069	GUGGAAUGAUGAUAAGUCUGACG
>bta-miR-20a MIMAT0003527	>bta-miR-30f MIMAT0009282	UGUAAACACCCUACACUCUCAGCU
UAAAGUGCUUAUAGUGCAGGUAG	>bta-miR-183 MIMAT0009245	UAUGGCACUGGUAGAAUUCACUG
>bta-miR-92b MIMAT0009384	>bta-miR-3432b MIMAT0036976	UUCGGGAUCUUUAGUUGUGGU
UAUUGCACUCGUCCCGGCCUCC	>bta-miR-199a-5p MIMAT0003544	CCCAGUGUUCAGACUACCUGUU
>bta-miR-6523b MIMAT0029951	>bta-miR-6529b MIMAT0029947	ACUCUGCGCCUCUGAUCUCU
CUGCUCAAAGUUACCCCAG	>bta-miR-2895 MIMAT0013853	CCUGCUGAUCUCACAUUAAUUCA
>bta-miR-2896 MIMAT0013854	>bta-miR-2481 MIMAT0012073	UACGUUGUCUGCUGGGUUUU
CGGCAGAUGAAGUCCAUC	>bta-miR-2428 MIMAT0011998	UGGCUGGAGUGCGGCGGAGGU
>bta-miR-2417 MIMAT0011981	>bta-miR-2298 MIMAT0011806	GACUGAUGUUGUUGUUUGCA
AGAUGGAGGCACUGAAAAUUU	>bta-let-7e MIMAT0004333	UGAGGUAGGAGGUUGUAUAGU
>bta-miR-493 MIMAT0009333	>bta-miR-2397-5p MIMAT0011951	UGCGUUCUUACCACUGGCCUGUA
UGAAGGUCUACUGUGUGCCAGG	>bta-miR-146a MIMAT0009236	UGAGAACUGAAUUCCAUAGGUUGU
>bta-miR-2285af MIMAT0031057	>bta-miR-192 MIMAT0003820	CUGACCUAUGAAUUGACAGCCAG
GCCAAAAAGCUUGUUCAGGUU	>bta-miR-329b MIMAT0009289	AGAGGUUUUCUGGGUUUCUGUUU
>bta-miR-545-3p MIMAT0003807	>bta-miR-1287 MIMAT0009971	UGCUGGAUCAGUGGUUUGAGUC
AUCAACAAACAUUUAUUGUGUG	>bta-miR-6119-3p MIMAT0024589	GCAAAUCAUUUUUUACUCUCCAA
>bta-miR-188 MIMAT0009249	>bta-miR-2318 MIMAT0011841	GUGUAUGAUGAAUUAUCUGACC
CAUCCCUUGCAUGGUGGAGGGU	>bta-miR-3604 MIMAT0016939	UAACCAAUGUGCAGACUACUGU
>bta-miR-2341 MIMAT0011876	>bta-miR-2466-3p MIMAT0012055	GCAGCCCCUCCGUCUGACUCAG
CAGUAGGUAGAAAGAAGGCUGA	>bta-miR-215 MIMAT0003797	AUGACCUAUGAAUUGACAGACA
>bta-miR-2467-3p MIMAT0012057	>bta-miR-2285y MIMAT0029944	AAAACCCAAACAAACUUUUUU
GAGGGCAGUGAGGCUCAGGGCUG	>bta-miR-760-5p MIMAT0009372	CCCCUCAGUCCACCAGAGCCCG
>bta-miR-2368-3p MIMAT0011912	>bta-miR-2328-3p MIMAT0011858	CUGCGUCUGGGGAGGGGGCCA
ACUGUCAGACCACCUCUGCC	>bta-miR-1835 MIMAT0009961	UGCACCCUGAGAGCUGGGGCUG
>bta-miR-185 MIMAT0009247	>bta-miR-98 MIMAT0003809	UGAGGUAGUAAGUUGUAUUGUU
UGGAGAGAAAGGCAGUUCCUGA	>bta-miR-302c MIMAT0009281	UAAGUGCUUCCAUGUUUCAGUGG
>bta-miR-2337 MIMAT0011870	>bta-miR-2284ab MIMAT0030437	UAAAAGUUUGGUUGGGUUUUU
GUGGUUUCUUAUUCCUUUUU	>bta-miR-3154 MIMAT0025529	CAGAAGGGGAGUCGGAGCAGA
>bta-miR-615 MIMAT0009355	>bta-miR-2285n MIMAT0025531	AAAAACCCGAAUGAACUUUUGG
GGGGGUCCCCGGUGCUCGGAUC	>bta-miR-2316 MIMAT0011837	ACUCCGGCCUGGACUGCGGCGGG
>bta-miR-105b MIMAT0009216	>bta-miR-2463 MIMAT0012050	CUGCAUGUGGUGGAAAUGUCUG
UCAAAUGCUCAGACUCCUUGGU	>bta-miR-2342 MIMAT0011877	CUCUGCGGAAGUUGGCGCUUU
>bta-miR-2373-5p MIMAT0011918	>bta-miR-2454-5p MIMAT0012035	CUGGGGGCUGCCAGGCAGGAGGC
CUUCCCCGGUCAGGGCUCGGC	>bta-miR-669 MIMAT0013838	UGUGGGUGUGUGCAUGUGCGUG
>bta-miR-33a MIMAT0009294	>bta-miR-2486-5p MIMAT0012081	GGAGAAGCACGGUGUAGGGUGGG
GUGCAUUGUAGUUGCAUUGCA	>bta-miR-23a MIMAT0003827	AUCACAUUGCCAGGGAUUUCCA
>bta-miR-2398 MIMAT0011953	>bta-miR-2285d MIMAT0011815	AAACCUGAACGAAAUUUUUGGC
AUCUAGGGACGCGUCGGCAACU	>bta-miR-6530 MIMAT0025566	CGCGGAGGAAGGUAAGACGG
>bta-miR-2285h MIMAT0024583	>bta-miR-562 MIMAT0009349	AAAGCAGCUGUACCAUUUAC
GAAAACCGAAACGAACUUUAUG	>bta-miR-2288 MIMAT0011795	AGGUAGUAGGUGUGUGGUUU
>bta-miR-340 MIMAT0009296	>bta-miR-2436-3p MIMAT0012009	CCCGCCCGACCGCCUCGCCCAA
UCCGUCUCAGUUACUUUAUAGCC	>bta-miR-2377 MIMAT0011923	ACUGCACAGACCUAGGCUCU
>bta-miR-149-5p MIMAT0024570	>bta-miR-29d-3p MIMAT0009275	UAGCACCAUUUGAAAUCGAUUA
UCUGGCUCCGUGUCUUCACUCCC	>bta-miR-494 MIMAT0009334	UGAAACAUACACGGGAAACCUC
>bta-miR-2408 MIMAT0011966	>bta-miR-487a MIMAT0003805	AAUCAUACAGGGACAUCCAGU
CACGUGUGUGAGCUCAGCCGG	>bta-miR-2410 MIMAT0011968	CUGAGCUGAGGAGGACCUGUGA
>bta-miR-1248 MIMAT0009972	>bta-miR-155 MIMAT0009241	UUAAUGCUAAUCGUGAUAGGGGU
ACCUUCUUGUAUAAGCACUGUGCUAAA	>bta-miR-339b MIMAT0012038	UCCCUGUCCUCCAGGAGCUC
>bta-miR-2284t-3p MIMAT0011832	>bta-miR-656 MIMAT0009361	AAUAUUAUACAGUCAACCUCU
AAACUCGAAUGAAUGUUUUGGC	>bta-miR-2284ac MIMAT0030447	AAAUGUUCGCUUGGCUUUUUCC
>bta-miR-1193 MIMAT0009965	>bta-miR-26b MIMAT0003531	UUCAAGUAAUUCAGGAUAGGUU
UAGGUCACCCGUUUGACUAUC	>bta-miR-24 MIMAT0009250	GUGCCUACUGAGCUGAUAUCAGU
>bta-miR-499 MIMAT0003536	>bta-miR-2882 MIMAT0013840	AGCCCGGGCCCCUCCCCUG
UUAAGACUUGCAGUGAUGUUU	>bta-miR-301a MIMAT0009276	CAGUGCAAUAGUAUUGUCAAAGCAU
>bta-miR-34a MIMAT0004340	>bta-miR-574 MIMAT0024577	UGAGUGUGUGUGUGUGAGUGUGUG
UGGCAGUGUCUUAGCUGGUUGU	>bta-miR-186 MIMAT0003818	CAAAGAAUUCUCCUUUUGGGCU
>bta-miR-2399-3p MIMAT0011955	>bta-miR-302b MIMAT0009280	UAAGUGCUUCCAUGUUUUAGUAG
UUCUAACAACUACAGAAAGUGU	>bta-miR-2917 MIMAT0012885	AUGACUGACAUGGACU
>bta-miR-124b MIMAT0013774	>bta-miR-92a MIMAT0009383	UAUUGCACUUGUCCCGGCCUGU
UAAGGCACGCGGUGAAUGCCAAG	>bta-miR-2284l MIMAT0011824	AAAAGUUGGUUCGGGUUUUU
>bta-miR-324 MIMAT0009285	>bta-miR-365-5p MIMAT0012539	AGGGACUUUUGGGGGCAGAUGUG
CGCAUCCCCUAGGGCAUUGGUGU	>bta-miR-190a MIMAT0009251	UGAUAUGUUUGAUAUAUUAGGU
>bta-miR-376d MIMAT0010199	>bta-miR-20b MIMAT0003796	CAAAGUGCUCACAGUGCAGGUA
AUCAUAGAGGAAAAUCCACAU	>bta-miR-7859 MIMAT0030434	AAAAACUGGCAGCUUCAUGUAA
>bta-miR-764 MIMAT0009948	>bta-miR-429 MIMAT0009315	UAAUACUGUCUGGUAAUGCCGU
GGUGCUCACUCGUCCUUCU	>bta-miR-2440 MIMAT0012015	UGCAGUGAUGAGACCCUGGA
>bta-miR-378b MIMAT0025535	>bta-miR-2434 MIMAT0012006	UUGUUGGGGUUUUUUUGUAU
ACUUGACUUGGAGUCAGAAGGC	>bta-miR-22-3p MIMAT0012536	AAGCUGCCAGUUGAAGAACUG
>bta-miR-26a MIMAT0003516	>bta-miR-2439-5p MIMAT0012013	UCUGGCCUGGCUGAUGAUCUCA
UUCAAGUAAUCCAGGAUAGGCU	>bta-miR-2459 MIMAT0012044	GCCAGAUGAUGGGAGCUGAUU
>bta-miR-2294 MIMAT0011802	>bta-miR-211 MIMAT0009263	UUCCCUUUGUCAUCCUUUGCC
GAGGCUGUAGAGGGCAUCUGCU	>bta-miR-133b MIMAT0009226	UUUGGUCCCCUUCAACCAGCUA
>bta-miR-1306 MIMAT0009974	>bta-miR-2420 MIMAT0011987	AGGUUGUGUGUUUAUUCUUU
CCACCUCCCCUGCAAACGUCC	>bta-miR-93 MIMAT0003837	CAAAGUGCUGUUCGUGCAGGUA
>bta-miR-2328-5p MIMAT0011857	>bta-miR-7691 MIMAT0029952	GCUGAGAGGUCUAAUAACUA
GCCCCCUCCCUUGGUCGCCGG	>bta-miR-1224 MIMAT0009944	GUGAGGACUCGGGAGGUGGAG
>bta-miR-181a MIMAT0003543	>bta-miR-30a-5p MIMAT0003841	UGUAAACAUCCUCGACUGGAAGCU
AACAUUCAACGCUGUCGGUGAGUU	>bta-miR-503-5p MIMAT0025557	UAGCAGCGGGAACAGUACUG
>bta-miR-383 MIMAT0009309	>bta-miR-6525 MIMAT0025554	CUGGGGAAAGCAGGAGUGAG
AGAUCAGAAGGUGAUUGUGGCU	>bta-miR-2303 MIMAT0011814	UCUGAAUGAUGUCGACUGAUG
>bta-miR-2321 MIMAT0011848	>bta-miR-2285v MIMAT0025579	AGAACCGGAACGAACUUUUUG
UGUCGGUUGGUUUUUGUUUG	>bta-miR-2300a-5p MIMAT0011809	UCCUCAGCUAGUUUUGUCUCCC
>bta-miR-543 MIMAT0009344	>bta-miR-4523 MIMAT0036971	GACCGAGAGGGCCUCGGCUGU
AAACAUUCGCGGUGCACUUCUU	>bta-miR-125b MIMAT0003539	UCCCUGAGACCCUAACUUGUGA
>bta-miR-500 MIMAT0009337	>bta-miR-1179 MIMAT0009957	AAGCAUUCUUUCAUUGGUUGG
UAAUCCUUGCUACCUGGGUGAGA	>bta-miR-2290 MIMAT0011798	GCCUCUGGUGGUCGGUUUGU
>bta-miR-2371 MIMAT0011916	>bta-miR-193a MIMAT0013837	GGGACUUUGUAGGCCAGUU
UAUAGUUUUGUGUGGUUUUU	>bta-miR-451 MIMAT0009323	AAACCGUUACCAUUACUGAGUUU
>bta-miR-2373-3p MIMAT0011919	>bta-miR-2394 MIMAT0011947	UUCUCCCCUCAAUCUCAGGACU
CGAGCCCGGCACGUGGAAGAGCC	>bta-miR-376e MIMAT0025543	AACAUAGAGGAAAAUCCACAUU
>bta-miR-200a MIMAT0003822	>bta-miR-2307 MIMAT0011819	AGUGAUGAUGAACCCUCUGAGC
UAACACUGUCUGGUAACGAUGUU	>bta-miR-4680 MIMAT0036979	AGAACUCUUGCAGUCUUAGAUGU
>bta-miR-375 MIMAT0009303	>bta-miR-3432a MIMAT0017396	UGCGGGAUCUUUAGUUGUGGUG
UUUUGUUCGUUCGGCUCGCGUGA	>bta-miR-184 MIMAT0009246	UGGACGGAGAACUGAUAAGGGU
>bta-miR-2423 MIMAT0011992	>bta-miR-2427 MIMAT0011997	AGGUCAUUUCAAAGAGGGCUG
UUGUGUGGUUGUUGUUUUCCU	>bta-miR-483 MIMAT0009327	UCACUCCUCUCCUCCCGUCUU
>bta-miR-7858 MIMAT0030433	>bta-miR-23b-5p MIMAT0012538	GGGUUCCUGGCAUGCUGAUUU
ACGCAAUUCUUCAAAAUCUUAGC	>bta-miR-2325b MIMAT0011927	AGGUUGUUUGGUUUUGUGUU
>bta-miR-205 MIMAT0003545	>bta-miR-449b MIMAT0009321	AGGCAGUGUAUUGUUAGCUGGC
UCCUUCAUUCCACCGGAGUCUG	>bta-miR-2450a MIMAT0012030	UGGGCAGUAGAGGUGCAUGUG
>bta-miR-106b MIMAT0009218	>bta-miR-2464-5p MIMAT0012051	ACUUCUGCUGCAGACCUGGAAGAC
UAAAGUGCUGACAGUGCAGAU	>bta-miR-377 MIMAT0009304	AUCACACAAAGGCAACUUUUGU
>bta-miR-3602 MIMAT0016937	>bta-miR-677 MIMAT0012003	CUCACUGAUGAGCAGCUUCUGAC
GUGUUGGGAUCACCGCGGUAA	>bta-miR-369-3p MIMAT0003802	AAUAAUACAUGGUUGAUCUUU
>bta-miR-2383 MIMAT0011932	>bta-miR-154a MIMAT0009240	UAGGUUAUCCGUGUAGCCUUCG
CUGAGUGAUGACUGCUGACC	>bta-miR-769 MIMAT0009376	UGAGACCUCCGGGUUCUGAGCU
>bta-miR-96 MIMAT0009388	>bta-miR-381 MIMAT0009307	UAUACAAGGGCAAGCUCUCUGU
UUUGGCACUAGCACAUUUUUGCU	>bta-miR-323 MIMAT0009284	GCACAUUACACGGUCGACCUCU
>bta-miR-2378 MIMAT0011924	>bta-miR-502a MIMAT0009338	AAUGCACCUGGGCAAGGAUUCA
UGUGGGUUGUCUGAGCAAGGG	>bta-miR-380-3p MIMAT0003804	UAUGUAAUGUGGUCCACGUCU
>bta-miR-378c MIMAT0025551	>bta-miR-875 MIMAT0009379	UAUACCUCAGUUUUAUCAGGUG
ACUGGACUUGGAGUCAGAAGU	>bta-miR-2372 MIMAT0011917	GAAUGAUGAAAGGAUUGGGUCA
>bta-miR-1284 MIMAT0009955	>bta-miR-2460 MIMAT0012045	UGGAGCUCUUGAGGCCUGGCAU
UCUGCACAGACCCUGGCUUUUC	>bta-miR-4449 MIMAT0036973	CGUCCCGGGGCCGCUCGAGGCA
>bta-miR-127 MIMAT0003787	>bta-miR-2388-3p MIMAT0011941	GCUCGAGGAAGCUGGAGAUGA
UCGGAUCCGUCUGAGCUUGGCU	>bta-miR-505 MIMAT0009341	CGUCAACACUUGCUGGUUUCCU
>bta-miR-1434-5p MIMAT0012039	>bta-miR-551a MIMAT0009347	GCGACCCAAUCUUGGUUUCCA
GUACAUGAUGACUAAAAUUUCU	>bta-miR-1388-3p MIMAT0013591	AUCUCAGGUUUGUCAGCCCGCA
>bta-miR-222 MIMAT0003530	>bta-miR-653 MIMAT0009358	GUGUUGAAACAAUCUCUGUUG
AGCUACAUCUGGCUACUGGGU	>bta-miR-2284v MIMAT0011937	AAAAAGUUCGUUUGGGGUUU
>bta-miR-99b MIMAT0004345	>bta-miR-421 MIMAT0009314	AUCAACAGACAUUAAUUGGGCGC
CACCCGUAGAACCGACCUUGCG	>bta-miR-326 MIMAT0009286	CCUCUGGGCCCUUCCUCCAG
>bta-miR-545-5p MIMAT0003806	>bta-miR-7860 MIMAT0030439	UGGAGCGGCUGCACAGAGCGU
UCAGUAAAUGUUUAUUGGAUG	>bta-miR-1814c MIMAT0011984	GUUUUGUUUGGGUUUGUUUU
>bta-miR-2405 MIMAT0011963	>bta-miR-2403 MIMAT0011960	CUCGGGAAGCUAGCUGGCCUU
UGUGUGGUUUGUUUGGCCUC	>bta-miR-146b MIMAT0009235	UGAGAACUGAAUUCCAUAGGCUGU
>bta-miR-2379 MIMAT0011925	>bta-miR-30b-3p MIMAT0012534	CUGGGAGGUGGAUGUUUACUU
AGGCUGCUGGAGAAGAUAUUUU	>bta-miR-2421 MIMAT0011988	UAUUUUUUUGUUUCGUGUUU
>bta-miR-2285k MIMAT0024586	>bta-miR-670 MIMAT0009364	UCCCUGAGUAUAUGUGGUGAA
AAAACCGGAAUGAACUUUUUG	>bta-miR-6521 MIMAT0025539	GUGGCGCCAGCUCUGAGCAGAGU
>bta-miR-760-3p MIMAT0022951	>bta-miR-652 MIMAT0024578	AAUGGCGCCACUAGGGUUGUG
CGGCUCUGGGUCUGUGGGGA	>bta-miR-2317 MIMAT0011838	CUCUGUGAUGACAAUACCUGAUA
>bta-miR-9-5p MIMAT0009389	>bta-miR-6528 MIMAT0025562	AGAGGGAAGAGGGAAGGAGG
UCUUUGGUUAUCUAGCUGUAUG	>bta-let-7d MIMAT0003810	AGAGGUAGUAGGUUGCAUAGUU
>bta-miR-2442 MIMAT0012017	>bta-miR-2308 MIMAT0011820	UUGGGCUUGCAGCAGAGAGUAA
AGAGCAGGGGCUGUGGGCUGCA	>bta-miR-134 MIMAT0009227	UGUGACUGGUUGACCAGAGUGG
>bta-miR-2320-3p MIMAT0011845	>bta-miR-2425-5p MIMAT0011994	CCAGGGCACGGAUCCAUGAACU
UCGAUGAUGGUCCCUGUGUUUU	>bta-miR-2302 MIMAT0011813	GGAGCGGGUGCAGGACCCCGG
>bta-miR-2319a MIMAT0011842	>bta-miR-302a MIMAT0009278	AAGUGCUUCCAUGUUUUAGUGA
CUACUCUGUAUUAGGCACUUAG	>bta-miR-660 MIMAT0004344	UACCCAUUGCAUAUCGGAGCUG
>bta-miR-2431-5p MIMAT0012001	>bta-miR-409b MIMAT0016935	GGGGUUCACCGAGCAACAUUC
CAGGUCAUAUAAGUGUGGAGUU	>bta-let-7g MIMAT0003838	UGAGGUAGUAGUUUGUACAGUU
>bta-miR-2285t MIMAT0025577	>bta-miR-7864 MIMAT0030449	CUUCCUCUUCCGGUUGGCAGA
AGAAUCUGGAUGAACUUUUUGG	>bta-miR-34c MIMAT0003854	AGGCAGUGUAGUUAGCUGAUUG
>bta-miR-1603 MIMAT0011823	>bta-miR-2285u MIMAT0031094	GAAAAACCCGAACGAACUUU
GUGGUUUGUUUUGUGUUUUU	>bta-miR-302d MIMAT0009279	UAAGUGCUUCCAUGUUUUAGU
>bta-miR-411a MIMAT0009312	>bta-miR-208b MIMAT0009262	AUAAGACGAACAAAAGGUUUGU
AUAGUAGACCGUAUAGCGUACG	>bta-miR-2347 MIMAT0011882	UGCAGAGGAACAAGGCUGAAC
>bta-miR-3533 MIMAT0036975	>bta-miR-411c-3p MIMAT0025546	UGUAUGUCAACUGAUCCACAGU
AUGAAGUGUGACGUGGACAU	>bta-miR-599 MIMAT0009354	GUUGUGUCAGUUUAUCAAAC
>bta-miR-2472 MIMAT0012063	>bta-miR-2284d MIMAT0011836	AAAAAGUUCGUUAGGGUUUUUC
UCAGGGUUUGGGAUUCAGGUGC	>bta-miR-139 MIMAT0003788	UCUACAGUGCACGUGUCUCCAGU
>bta-miR-2466-5p MIMAT0012054	>bta-miR-2457 MIMAT0012042	UUGCCAACUGCAGAGCCGCGCU
CUGAGUCCGGUGGGGCAGUGUGU	>bta-miR-1185 MIMAT0009973	AGAGGAUACCCUUUGUAUGUU
>bta-miR-2284aa MIMAT0025560	>bta-miR-2366 MIMAT0011904	UGGGUCACAGAAGAGGGUCUGG
AAAAAAGUUUGUUUGGGUUUU	>bta-miR-379 MIMAT0009306	UGGUAGACUAUGGAACGUAGG
>bta-miR-2904 MIMAT0013862	>bta-miR-2380 MIMAT0011928	GUGACUGUACUUUAAAAGGUUA
GGGAGCCUCGGUUGGCCUC	>bta-miR-2284a MIMAT0011906	AAAAGUUCGUUGGGGUUUUU
>bta-miR-2444 MIMAT0012021	>bta-miR-376b MIMAT0009945	AUCAUAGAGGAAAAUCCAUGUU
UUUGUGUUGUUUUUUGUUUU	>bta-miR-296-3p MIMAT0009273	GAGGGUUGGGCGGAGGCUUUCC
>bta-miR-2352 MIMAT0011888	>bta-miR-8550 MIMAT0033821	CAGGCUCUGGAACACGGGAGC
AAACUGAAAGAACAGGAUUGCUG	>bta-miR-2367-5p MIMAT0011909	ACCCUGUAACUCAGCCAUCAGAG
>bta-miR-2453 MIMAT0012034	>bta-miR-2362 MIMAT0011900	CACUGUGAUGGAGCGUUCUGACC
UCCUCAGGGCAGGAAGUGCGCAG	>bta-miR-1256 MIMAT0009960	AGGCAUUGACUUCUCUCUAGAU
>bta-miR-6519 MIMAT0025537	>bta-miR-2285x MIMAT0029946	GAAAAAUCUGAAUGAACUUUUGG
UAGCAGCGGGAACAGAGAAA	>bta-miR-2393 MIMAT0011946	UAGAUUUUUUGUUUUCUUUU
>bta-miR-487b MIMAT0003847	>bta-miR-2330-5p MIMAT0011861	UGGGCUUGGGCAGUGAGGACUGG
AAUCGUACAGGGUCAUCCACUU	>bta-miR-6122-5p MIMAT0024594	UCAGUUGUACUUUAUCCAGUGC
>bta-miR-217 MIMAT0009267	>bta-miR-2414 MIMAT0011977	UGUGUUAGUGCGGAUGGUGUUA
UACUGCAUCAGGAACUGAUUGGAU	>bta-miR-194 MIMAT0009254	UGUAACAGCAACUCCAUGUGGA
>bta-miR-1271 MIMAT0009975	>bta-miR-2285m MIMAT0025533	AAAACGCAAAUGAACUUUUUGG
CUUGGCACCUAGUAAGUACUCA	>bta-miR-29c MIMAT0003829	UAGCACCAUUUGAAAUCGGUUA
>bta-miR-448 MIMAT0009319	>bta-miR-2900 MIMAT0013858	AGGGCGGGCGGCGACUGGAA
UUGCAUAUGUAGGAUGUCCCAU	>bta-let-7a-3p MIMAT0004330	CUAUACAAUCUACUGUCUUUC
>bta-miR-181d MIMAT0009243	>bta-miR-2355-5p MIMAT0011891	CCCAGAUACAAUGGACAAUAUGC
AACAUUCAUUGUUGUCGGUGGGU	>bta-miR-2284h-3p MIMAT0012020	ACCCCAAUGAGCUUUUGACC
>bta-miR-6121-5p MIMAT0024592	>bta-miR-2892 MIMAT0013850	GGCGACGGAGGCGCGACCCCCC
UCGGAGCGCCCUCGCCAGAC	>bta-miR-19a MIMAT0004336	UGUGCAAAUCUAUGCAAAACUGA
>bta-miR-1584-5p MIMAT0011969	>bta-miR-2295 MIMAT0011803	UCGGGGUGGGAGGAAGGUUCU
UUGGGGCUGGGCUGGGGGCA	>bta-miR-197 MIMAT0009257	UUCACCACCUUCUCCACCCAGC
>bta-miR-2329-5p MIMAT0011860	>bta-miR-2433 MIMAT0012005	UGGGGGCGCUGCAGACACGGAUG
ACUUAUCAGCUCACAUCACAGA	>bta-miR-2957 MIMAT0016933	CCAAGUUCUGUCAUGCACUGA
>bta-miR-29a MIMAT0003518	>bta-miR-2439-3p MIMAT0012014	UAUCAGAAGACAGGUAGGCAGA
CUAGCACCAUCUGAAAUCGGUUA	>bta-miR-2284m MIMAT0011976	GAAAAGUUUGUUCGGGUUUU
>bta-miR-135a MIMAT0009228	>bta-miR-2369 MIMAT0011913	GUAGGUUGUGGGUUUUUGUUU
UAUGGCUUUUUAUUCCUAUGUGA	>bta-miR-6516 MIMAT0030443	UUUGCAGUAACAGGUGUGAAC
>bta-miR-2390 MIMAT0011943	>bta-miR-491 MIMAT0009332	AGUGGGGAACCCUUCCAUGAGG
GUUGUGUGUUUUUGUUUUCC	>bta-miR-2325c MIMAT0011934	GGUUGUUUUUUUUCUUUUUC
>bta-miR-216b MIMAT0009266	>bta-miR-2450b MIMAT0012029	CAUGGUCAGUAGAGGUGCAUGUG
AAAUCUCUGCAGGCAAAUGUGA	>bta-miR-2330-3p MIMAT0011862	ACUCCUUACCCCUGGCCGUC
>bta-miR-3613b MIMAT0029948	>bta-miR-631 MIMAT0009357	AGACCUGGCUUAGACCUCAGC
GAACAAAAAAAAAAGUACAAC	>bta-miR-1260b MIMAT0024568	AUCCCACCACUGCCACCA
>bta-miR-204 MIMAT0004338	>bta-miR-2326 MIMAT0011855	CCCCCCUUCCUCUGGAAAAA
UUCCCUUUGUCAUCCUAUGCCU	>bta-miR-2370-5p MIMAT0011914	UGGGAAAAUGAAAGUUGGUUAU
>bta-miR-665 MIMAT0009363	>bta-miR-761 MIMAT0009373	GCAGCAGGGUGAAACUGACACA
ACCAGUAGGCCGAGGCCCCU	>bta-miR-2893 MIMAT0013851	GUGGAGGAGAAUGCCCGGGG
>bta-miR-2285q MIMAT0025574	>bta-miR-2399-5p MIMAT0011954	CUUUCUGUAGCUGUUGGAACUA
AAGGACCUGAAUGAACUUUCUGG	>bta-miR-2889 MIMAT0013847	GUCCCCGGGGCUCCCGCCGGC
>bta-miR-137 MIMAT0009231	>bta-miR-495 MIMAT0009335	AAACAAACAUGGUGCACUUCUU
UUAUUGCUUAAGAAUACGCGUAG	>bta-miR-2447 MIMAT0012024	UCUGGGAACCGGUUUGGCUGCU
>bta-miR-758 MIMAT0009370	>bta-miR-154c MIMAT0025542	AGAUAUUGCACGGUUGAUCUCU
UUUGUGACCUGGUCCACUAACC	>bta-miR-2355-3p MIMAT0011892	AUUGUCCUUGCUGUUUGGAGAU
>bta-miR-187 MIMAT0009248	>bta-miR-489 MIMAT0009942	GUGACAUCACAUAUAUGGCGAC
UCGUGUCUUGUGUUGCAGCCGG	>bta-miR-1197 MIMAT0009966	UAGGACACAUGGUCUACUUCU
>bta-miR-151-3p MIMAT0003524	>bta-miR-1814b MIMAT0011908	AGAUUGUUUAGUUUUGUUUG
CUAGACUGAAGCUCCUUGAGG	>bta-miR-2284w MIMAT0017393	AAGAGUUUGUUCGGGUUUCUC
>bta-miR-2293 MIMAT0011801	>bta-miR-885 MIMAT0009382	UCCAUUACACUACCCUGCCUCU
UGAUUUUGUUGUUUUGUAUU	>bta-miR-708 MIMAT0009367	AAGGAGCUUACAAUCUAGCUGGG
>bta-miR-28 MIMAT0009272	>bta-miR-2898 MIMAT0013856	UGGUGGAGAUGCCGGGGA
AAGGAGCUCACAGUCUAUUGAG	>bta-miR-2301 MIMAT0011812	GUGGUUUUGGUUUCCCUCUU
>bta-miR-335 MIMAT0009291	>bta-miR-2382-3p MIMAT0011931	CUACUUCCUGGUGCCUCGCCCCAC
UCAAGAGCAAUAACGAAAAAUGU	>bta-miR-450a MIMAT0003834	UUUUGCGAUGUGUUCCUAAUAU
>bta-miR-2426 MIMAT0011996	>bta-miR-2299-5p MIMAT0011807	ACUGGAUUCAUUUCUCUGAAA
AAGGAAGUGGCUUGGGGAAAG	>bta-miR-27a-3p MIMAT0003532	UUCACAGUGGCUAAGUUCCG
>bta-miR-2304 MIMAT0011816	>bta-miR-320a MIMAT0003534	AAAAGCUGGGUUGAGAGGGCGA
GGUUGUGUGGUUGUGUGUGU	>bta-miR-130b MIMAT0009224	CAGUGCAAUGAUGAAAGGGCAU
>bta-miR-2300b-3p MIMAT0011810	>bta-miR-30d MIMAT0003533	UGUAAACAUCCCCGACUGGAAGCU
GGGAGACAAAACUAGCUGAGGA	>bta-miR-6533 MIMAT0025569	UGCGGCAGAGCAUUAGAGAAC
>bta-miR-664a MIMAT0012078	>bta-miR-30b-5p MIMAT0003547	UGUAAACAUCCUACACUCAGCU
CAGGCUGGGGUGUGUGUGGAUG	>bta-miR-2402 MIMAT0011959	AUACCUGCCACUCUGCCAGCA
>bta-miR-3596 MIMAT0016940	>bta-miR-2401 MIMAT0011958	AGAGCUUGUGUCUAGGGCUG
AACCACACAACCUACUACCUCA	>bta-miR-2285aa MIMAT0030435	AAAACUGGAACGAACUUUUGGGC
>bta-miR-2897 MIMAT0013855	>bta-miR-2285ae MIMAT0030448	AGAAAGUUCAUUUAGGUUUUUC
GGUGGGAGGGUCCCACCGAG	>bta-miR-2284n MIMAT0011846	AAAAAGUUUAUUCGGGUUUUU
>bta-miR-100 MIMAT0009215	>bta-miR-2411-3p MIMAT0011973	GCUGAACUGUCUUACUCCCACAUCC
AACCCGUAGAUCCGAACUUGUG	>bta-miR-7857 MIMAT0030432	AUAGCCAGUUGGGGAAGAAUGC
>bta-miR-2483-5p MIMAT0012075	>bta-miR-2346 MIMAT0011881	ACUGAUGUGAAGGUGGUUUGGC
CGUCAACCAUCCAGCUGUUUGA	>bta-miR-196b MIMAT0009256	UAGGUAGUUUCCUGUUGUUGGGA
>bta-miR-99a-3p MIMAT0012533	>bta-miR-2285ab MIMAT0030436	AAAACCUGAAUGAACUUCUUGG
CAAGCUCGCUUCUAUGGGU	>bta-miR-2284c MIMAT0011926	AAAAAGUUCGUUUUGGUUUU
>bta-miR-6536 MIMAT0025572	>bta-miR-328 MIMAT0009287	CUGGCCCUCUCUGCCCUUCCGU
UUUAAGUAUACGAUGAACUGC	>bta-miR-148a MIMAT0003522	UCAGUGCACUACAGAACUUUGU
>bta-miR-3064 MIMAT0036974	>bta-miR-2389 MIMAT0011942	GAGGGGACUCGGGAGUCGGAG
UUGCCACACUGCAACACCUUACA	>bta-miR-2339 MIMAT0011873	UCACUGGACCUAGCAGAGCU
>bta-miR-2418 MIMAT0011982	>bta-miR-654 MIMAT0009359	UAUGUCUGCUGACCAUCACCUU
UGGGAUGAGUGUGGCGUGGUCG	>bta-miR-26c MIMAT0016938	AGCCUAUCCUGGAUUACUUGAA
>bta-miR-671 MIMAT0009365	>bta-miR-2419-5p MIMAT0011985	AUCGCAUCAACACUCGUCUGUU
AGGAAGCCCUGGAGGGGCUGGAG	>bta-miR-2412 MIMAT0011974	UUGGGGCUGGGUGGGGAGAGGG
>bta-miR-2354 MIMAT0011890	>bta-miR-378 MIMAT0009305	ACUGGACUUGGAGUCAGAAGGC
UAGUAGGUUGUGUUGUUUAGU	>bta-miR-568 MIMAT0009350	AUGUAUAAAUGUAUACACAC
>bta-miR-1584-3p MIMAT0011970	>bta-miR-1251 MIMAT0009963	ACUCUAGCUGCCAAAGGCGCU
CUCUCUCCGCAGACCUCAGCCG	>bta-miR-2309 MIMAT0011821	UGUGAGGGUGGUGGACGGCAGGG
>bta-miR-2385-3p MIMAT0011936	>bta-miR-22-5p MIMAT0003826	AGUUCUUCAGUGGCAAGCUUUA
AAGUACUCGCCCUGUCUCAGUA	>bta-miR-10a MIMAT0003786	UACCCUGUAGAUCCGAAUUUGUG
>bta-miR-2365 MIMAT0011903	>bta-miR-153 MIMAT0009239	UUGCAUAGUCACAAAAGUGAUC
AGUUUUUGCUGUUUCUUAUC	>bta-miR-371 MIMAT0009301	AAGUGCCGCCAUGUUUUGAGUGU
>bta-miR-1249 MIMAT0009976	>bta-miR-2285b MIMAT0011833	AAAAUCUGAGUGAACUUUUUGG
ACGCCCUUCCCCCCCUUCUUCA	>bta-miR-2286 MIMAT0011793	GAAGCAGGGCGGAACGAUGUGU
>bta-miR-541 MIMAT0009343	>bta-miR-412 MIMAT0009313	ACUUCACCUGGUCCACUAGCUGU
UGGUGGGCACAGAAUCCGGCCU	>bta-miR-34b MIMAT0003549	AGGCAGUGUAAUUAGCUGAUUG
>bta-miR-2471-3p MIMAT0012062	>bta-miR-6535 MIMAT0025571	UAGGGGGAGCGGUUGGAGGACU
UCUGAUGAAGACAGCCCUGCU	>bta-miR-2422 MIMAT0011989	UUGAGGGGACUGAGGUGCGGAG
>bta-miR-2465 MIMAT0012053	>bta-miR-223 MIMAT0009270	UGUCAGUUUGUCAAAUACCCCA
UGAGCCACAGUAGAGCCUUGGAU	>bta-miR-592 MIMAT0009353	AUUGUGUCAAUAUGCGAUGAUGU
>bta-miR-2409 MIMAT0011967	>bta-miR-2467-5p MIMAT0012056	ACCCCAAGCCUGGCUGCUACCU
UCUCACAUGGACGCUGCCCU	>bta-miR-2415-3p MIMAT0011979	CCAGGCCUGCUGGACCGACGC
>bta-miR-140 MIMAT0003789	>bta-miR-2363 MIMAT0011901	UCAACUUGGUCAAGGAAUAUUU
UACCACAGGGUAGAACCACGGA	>bta-miR-7863 MIMAT0030445	AUGGACUGUCACCUGAGGAGC
>bta-miR-126-5p MIMAT0004328	>bta-miR-154b MIMAT0025547	AGAGGUCUUCCAUGGUGCAUUCG
CAUUAUUACUUUUGGUACGCG	>bta-miR-2485 MIMAT0012079	UUUCUAGAAUCUGCAGGUAGU
>bta-miR-2322-3p MIMAT0011851	>bta-miR-331-5p MIMAT0026716	UCUAGGUAUGGUCCCAGG
AUGAGGAUGGACUUAGCUUUCG	>bta-miR-346 MIMAT0009297	UGUCUGCCCGCAUGCCUGCCUCU
>bta-miR-2322-5p MIMAT0011850	>bta-miR-361 MIMAT0003830	UUAUCAGAAUCUCCAGGGGUAC
AAGAAAGCGAAGUCCAUCCUCAU	>bta-miR-145 MIMAT0003542	GUCCAGUUUUCCCAGGAAUCCCU
>bta-miR-2489 MIMAT0011825	>bta-miR-6520 MIMAT0025538	UUGAGUAUUGUCAGAGAGAGC
AAAUGACAGGGGACAUGAGUUU	>bta-miR-3613a MIMAT0024574	UGUUGUACUUUUUUUUUUGUUC
>bta-let-7c MIMAT0004332	>bta-miR-2375 MIMAT0011921	CCCAGUGAUGGAGAGGUCUGAUC
UGAGGUAGUAGGUUGUAUGGUU	>bta-miR-2332 MIMAT0011865	CGGUUUAAGGUCUUGGAGACAAAG
>bta-miR-1246 MIMAT0024567	>bta-miR-338 MIMAT0009292	UCCAGCAUCAGUGAUUUUGUUGA
AAUGGAUUUUUGGAGCAGG	>bta-miR-1 MIMAT0009214	UGGAAUGUAAAGAAGUAUGUAU
>bta-miR-376c MIMAT0009947	>bta-miR-425-3p MIMAT0003833	AUCGGGAAUGUCGUGUCCGCCC
GUGGAUAUUCCUUCUAUGUUUA	>bta-miR-449a MIMAT0009320	UGGCAGUGUAUUGUUAGCUGGU
>bta-miR-6529a MIMAT0025565	>bta-miR-544a MIMAT0009346	AUUCUGCAUUUUUAGCAAGUUC
GAGAGAUCAGAGGCGCAGAGU	>bta-miR-193a-3p MIMAT0003795	AACUGGCCUACAAAGUCCCAGU
>bta-miR-2404 MIMAT0011961	>bta-miR-2361 MIMAT0011899	GUUGUGUUGUUUUUUUUUGU
UUGCACUGCAUGGUAUCUGC	>bta-miR-449d MIMAT0011962	GAAGGCUGUGUGCUGUGGAG
>bta-miR-502b MIMAT0009339	>bta-miR-1343-3p MIMAT0011840	CUCCUGGGGCCCGCACUCUC
AAUCCACCUGGGCAAGGAUUC	>bta-miR-2313-3p MIMAT0011830	CCAGUUCCACGCUGCAUGCC
>bta-miR-2284f MIMAT0011905	>bta-miR-2479 MIMAT0012071	AGUUUGUAUUGUUUCUUUUG
AAAGUUCGUUCGGAUUUUUC	>bta-let-7f MIMAT0003519	UGAGGUAGUAGAUUGUAUAGUU
>bta-miR-29b MIMAT0003828	>bta-miR-16a MIMAT0009242	UAGCAGCACGUAAAUAUUGGUG
UAGCACCAUUUGAAAUCAGUGUU
>bta-miR-2285ad MIMAT0030446
AAAACCCAAAUGAACUUUUUGG
>bta-miR-369-5p MIMAT0003801
AUCGACCGUGUUAUAUUCGC
>bta-miR-2475 MIMAT0012066
UGAAGUGUGUGAAACUGCAGCGG
>bta-miR-1307 MIMAT0009969
ACUCGGCGUGGCGUCGGUCGUG
>bta-miR-3141 MIMAT0024573
GAGGGCGGGUGGAGGAGG
>bta-miR-2292 MIMAT0011800
GAGUCUGAGAUUGAGGAAGGCA
>bta-miR-2285s MIMAT0025576
AAGACCCAAGUGAACUCUUUGG
>bta-miR-2448-5p MIMAT0012025
CUGCGGAUACAACCAAACACGG
>bta-miR-1298 MIMAT0009970
UUCAUUCGGCUGUCCAGAUGUA
>bta-miR-1301 MIMAT0009958
UUGCAGCUGCCUAGGAGUGAUUUC
>bta-miR-6121-3p MIMAT0024593
CCGGAUGAUGGACACUGAGG
>bta-miR-2384 MIMAT0011933
AACUGUACUGGAAGGAUGGAUGG
>bta-miR-329a MIMAT0009288
AACACACCUGGUUAACCUUUUU
>bta-miR-2284u MIMAT0011895
AAAAGUUCGUUCGGUUUUUCU
>bta-miR-2310 MIMAT0011822
GUUUUGUUUGGGUUUGUUUCU
>bta-miR-10b MIMAT0003839
UACCCUGUAGAACCGAAUUUGUG
>bta-miR-191 MIMAT0003819
CAACGGAAUCCCAAAAGCAGCUG
>bta-miR-33b MIMAT0009295
GUGCAUUGCUGUUGCAUUGC
>bta-miR-2480 MIMAT0012072
AUUGUAUUGUUUCUUAUGAC
>bta-miR-106a MIMAT0003784
AAAAGUGCUUACAGUGCAGGUA
>bta-miR-365-3p MIMAT0004341
UAAUGCCCCUAAAAAUCCUUAU
>bta-miR-2285w MIMAT0029945
ACCAAAAGUUCAUUCAGAUUU
>bta-miR-15a MIMAT0004334
UAGCAGCACAUAAUGGUUUGU
>bta-miR-1777b MIMAT0012046
GGGGGCGGUGGGGGGCGGGG
>bta-miR-539 MIMAT0009342
GGAGAAAUUAUCCUUGGUGUGU
>bta-miR-196a MIMAT0009255
UAGGUAGUUUCAUGUUGUUGGG
>bta-miR-2456 MIMAT0012041
ACGCACUGUCCUGGGAAGUGG
>bta-miR-320b MIMAT0011991
AGCUGGGUUGAGAGGGUGGU
>bta-miR-378d MIMAT0036972
CUGGACUUGGAGUCAGAAGACC
>bta-miR-6527 MIMAT0025561
CACGUGGACGAAGAGAUGGGA
>bta-miR-497 MIMAT0004343
CAGCAGCACACUGUGGUUUGUA
>bta-miR-2336 MIMAT0011869
CUAACCGUAACUUUGAAGUGCU
>bta-miR-125a MIMAT0003538
UCCCUGAGACCCUUUAACCUGUG
>bta-miR-2437 MIMAT0012011
UGUGGUUUUUUGUUUUCCUUU
>bta-miR-18a MIMAT0003526
UAAGGUGCAUCUAGUGCAGAUA
>bta-miR-181c MIMAT0003817
AACAUUCAACCUGUCGGUGAGUUU
>bta-miR-2462 MIMAT0012049
AAAGGAUUGGCUGAAUUGUAG
>bta-miR-6122-3p MIMAT0024595
ACUAUAUGAUGUAAACUGAAC
>bta-miR-431 MIMAT0009316
UGUCUUGCAGGCCGUCAUGCAGG
>bta-miR-216a MIMAT0009265
UAAUCUCAGCUGGCAACUGUGA
>bta-miR-30c MIMAT0003850
UGUAAACAUCCUACACUCUCAGC
>bta-miR-411c-5p MIMAT0025545
GGUUGAUCAGAGAACAUACAUU
>bta-miR-2345 MIMAT0011880
GUUGUGUGUUUUCUUAUUUC
>bta-miR-296-5p MIMAT0026918
GAGGGCCCCCCCCAAUCCU
>bta-miR-6531 MIMAT0025567
UAGACUUGGUGUACUUUGAGAGA
>bta-miR-2488 MIMAT0012084
AUGUUGAUCCUAUUCCCUCU
>bta-miR-485 MIMAT0009328
AGAGGCUGGCCGUGAUGAAUUCG
>bta-miR-582 MIMAT0009351
UUACAGUUGUUCAACCAGUUACU
>bta-miR-17-3p MIMAT0003816
ACUGCAGUGAAGGCACUUGU
>bta-miR-148b MIMAT0003814
UCAGUGCAUCACAGAACUUUGU
>bta-miR-2297 MIMAT0011805
CACUCUUUUUUCUUAUUCCU
>bta-miR-542-5p MIMAT0013594
UCGGGGAUCAUCAUGUCACGAG
>bta-miR-331-3p MIMAT0004339
GCCCCUGGGCCUAUCCUAGAA
>bta-miR-6119-5p MIMAT0024588
AGAGGUAAAAAAUUGAUUUGACU
>bta-miR-2455 MIMAT0012037
UCUGUGCUCGGGGAGGCAGGGA
>bta-miR-152 MIMAT0009238
UCAGUGCAUGACAGAACUUGGG
>bta-miR-1721 MIMAT0011849
CACAGAUGAUGUGAUUCUGAGA
>bta-miR-143 MIMAT0009233
UGAGAUGAAGCACUGUAGCUCG
>bta-miR-449c MIMAT0009322
AGGCAGUGCAUCUCUAGCUGG
>bta-miR-2449 MIMAT0012027
UGGGCAGGAGACAGCAGGGC
>bta-miR-107 MIMAT0003785
AGCAGCAUUGUACAGGGCUAUC
>bta-miR-2374 MIMAT0011920
UUGGGGCUGGGGAGAGGCGGG
>bta-miR-2458 MIMAT0012043
AUUGGAAAGAGUAAGCUGGUGU
>bta-miR-133c MIMAT0029949
AUUUGGUUCCAUUUUACCAGC
>bta-miR-655 MIMAT0009360
AUAAUACAUGGUUAACCUCUCU
>bta-miR-532 MIMAT0003848
CAUGCCUUGAGUGUAGGACCGU
>bta-miR-2478 MIMAT0012070
GUAUCCCACUUCUGACACCA
>bta-miR-2285a MIMAT0011797
AAAAACUGAAUGAAAUUCUUGG
>bta-miR-190b MIMAT0009252
UGAUAUGUUUGAUAUUGGGUU
>bta-miR-628 MIMAT0009356
AUGCUGACAUAUUUACUAGAGG
>bta-miR-6526 MIMAT0025556
UCCUGUGCCUCGAAUGGGUAUG
>bta-miR-129-5p MIMAT0009221
CUUUUUGCGGUCUGGGCUUGCU
>bta-miR-218 MIMAT0003798
UUGUGCUUGAUCUAACCAUGUG
>bta-miR-136 MIMAT0009230
ACUCCAUUUGUUUUGAUGAUGGA
>bta-miR-370 MIMAT0009300
GCCUGCUGGGGUGGAACCUGGU
>bta-miR-744 MIMAT0009369
UGCGGGGCUAGGGCUAACAGCA
>bta-miR-767 MIMAT0009375
UGCACCAUGGUUGUCUGAGCAUG
>bta-miR-2284k MIMAT0011907
GAAAAGUUCGGUCGGGUUUUU
>bta-miR-2287 MIMAT0011794
CUGGGACUGGUGGCAGCACUU
>bta-miR-142-5p MIMAT0003790
CAUAAAGUAGAAAGCACUAC
>bta-miR-299 MIMAT0009274
UGGUUUACCGUCCCACAUACAU
>bta-miR-2883 MIMAT0013841
CUUCCCGUGUGUUGAGCC
>bta-miR-2343 MIMAT0011878
AAGGGGAGACGGUGGAACUUAU
>bta-miR-2364 MIMAT0011902
UCUCUGUGGAUGGAUGUGGGCAG
>bta-miR-130a MIMAT0009223
CAGUGCAAUGUUAAAAGGGCAU
>bta-miR-29d-5p MIMAT0026919
UGACCGAUUUCUCCUGGUGUU
>bta-miR-212 MIMAT0009264
ACCUUGGCUCUAGACUGCUUACU
>bta-miR-2894 MIMAT0013852
AGCCCUGGCCCUGCCAUCGUG
>bta-miR-29e MIMAT0009953
UAGCAUCAUUUGAAAUCAGUGUUU
>bta-miR-424-3p MIMAT0015304
CAAAACGUGAGGCGCUGCUAU
>bta-miR-7862 MIMAT0030442
UGGUGCUCCCUGGAGCUGAGC
>bta-miR-151-5p MIMAT0003523
UCGAGGAGCUCACAGUCUAGU
>bta-miR-4286 MIMAT0024575
ACCCCACUCCUGGUACC
>bta-miR-454 MIMAT0009326
UAGUGCAAUAUUGCUUAUAGGGU
>bta-miR-2392 MIMAT0011945
AUGGAUGGGGGUGAGGGGUGCA
>bta-miR-27a-5p MIMAT0012532
AGGGCUUAGCUGCUUGUGAGCA
>bta-let-7b MIMAT0004331
UGAGGUAGUAGGUUGUGUGGUU
>bta-miR-2902 MIMAT0013860
GUGGCUGUCCCUGGAGGUGGG
>bta-miR-2438 MIMAT0012012
UGGGGUGUGUGCUGGAGCCUGCU
>bta-miR-199c MIMAT0011871
UACAGUAGUCUGCACAUUGG
>bta-miR-18b MIMAT0003517
UAAGGUGCAUCUAGUGCAGUUA
>bta-miR-1291 MIMAT0009956
UGGCCCUGACUGAAGACCUGCAGU
>bta-miR-2344 MIMAT0011879
GCACGAUGAUGGCGGAUCUGAGUU
>bta-miR-484 MIMAT0003535
UCAGGCUCAGUCCCCUCCCGAU
>bta-miR-2469 MIMAT0012059
UUACUGUAGGGCCUGCGGCUU
>bta-miR-2311 MIMAT0011826
UACUGAAACUGUGCUCGUGGUGU
>bta-miR-2323 MIMAT0011852
UGACCUGAUCAUGCUUACUGAGC
>bta-miR-2284e MIMAT0012080
AAGUUCGUUCGGAUUUUUCC
>bta-miR-2291 MIMAT0011799
GCUGAUAGUGAGCGACUGGGGCAG
>bta-miR-2299-3p MIMAT0011808
UCCGGGGAAUGGAUCCAGCGU
>bta-miR-409a MIMAT0009310
AGGUUACCCGAGCAACUUUGCAU
>bta-miR-455-5p MIMAT0003835
UAUGUGCCUUUGGACUACAUC
>bta-miR-940 MIMAT0009386
AAGGCUGGGCCCCCGCUCCGC
>bta-miR-202 MIMAT0009259
UUCCUAUGCAUAUACUUCUUU
>bta-miR-2477 MIMAT0012069
GUGGAAUGAUGAUAAGUCUGACG
>bta-miR-30f MIMAT0009282
UGUAAACACCCUACACUCUCAGCU
>bta-miR-183 MIMAT0009245
UAUGGCACUGGUAGAAUUCACUG
>bta-miR-3432b MIMAT0036976
UUCGGGAUCUUUAGUUGUGGU
>bta-miR-199a-5p MIMAT0003544
CCCAGUGUUCAGACUACCUGUU
>bta-miR-6529b MIMAT0029947
ACUCUGCGCCUCUGAUCUCU
>bta-miR-2895 MIMAT0013853
CCUGCUGAUCUCACAUUAAUUCA
>bta-miR-2481 MIMAT0012073
UACGUUGUCUGCUGGGUUUU
>bta-miR-2428 MIMAT0011998
UGGCUGGAGUGCGGCGGAGGU
>bta-miR-2298 MIMAT0011806
GACUGAUGUUGUUGUUUGCA
>bta-let-7e MIMAT0004333
UGAGGUAGGAGGUUGUAUAGU
>bta-miR-2397-5p MIMAT0011951
UGCGUUCUUACCACUGGCCUGUA
>bta-miR-146a MIMAT0009236
UGAGAACUGAAUUCCAUAGGUUGU
>bta-miR-192 MIMAT0003820
CUGACCUAUGAAUUGACAGCCAG
>bta-miR-329b MIMAT0009289
AGAGGUUUUCUGGGUUUCUGUUU
>bta-miR-1287 MIMAT0009971
UGCUGGAUCAGUGGUUUGAGUC
>bta-miR-6119-3p MIMAT0024589
GCAAAUCAUUUUUUACUCUCCAA
>bta-miR-2318 MIMAT0011841
GUGUAUGAUGAAUUAUCUGACC
>bta-miR-3604 MIMAT0016939
UAACCAAUGUGCAGACUACUGU
>bta-miR-2466-3p MIMAT0012055
GCAGCCCCUCCGUCUGACUCAG
>bta-miR-215 MIMAT0003797
AUGACCUAUGAAUUGACAGACA
>bta-miR-2285y MIMAT0029944
AAAACCCAAACAAACUUUUUU
>bta-miR-760-5p MIMAT0009372
CCCCUCAGUCCACCAGAGCCCG
>bta-miR-2328-3p MIMAT0011858
CUGCGUCUGGGGAGGGGGCCA
>bta-miR-1835 MIMAT0009961
UGCACCCUGAGAGCUGGGGCUG
>bta-miR-98 MIMAT0003809
UGAGGUAGUAAGUUGUAUUGUU
>bta-miR-302c MIMAT0009281
UAAGUGCUUCCAUGUUUCAGUGG
>bta-miR-2284ab MIMAT0030437
UAAAAGUUUGGUUGGGUUUUU
>bta-miR-3154 MIMAT0025529
CAGAAGGGGAGUCGGAGCAGA
>bta-miR-2285n MIMAT0025531
AAAAACCCGAAUGAACUUUUGG
>bta-miR-2316 MIMAT0011837
ACUCCGGCCUGGACUGCGGCGGG
>bta-miR-2463 MIMAT0012050
CUGCAUGUGGUGGAAAUGUCUG
>bta-miR-2342 MIMAT0011877
CUCUGCGGAAGUUGGCGCUUU
>bta-miR-2454-5p MIMAT0012035
CUGGGGGCUGCCAGGCAGGAGGC
>bta-miR-669 MIMAT0013838
UGUGGGUGUGUGCAUGUGCGUG
>bta-miR-2486-5p MIMAT0012081
GGAGAAGCACGGUGUAGGGUGGG
>bta-miR-23a MIMAT0003827
AUCACAUUGCCAGGGAUUUCCA
>bta-miR-2285d MIMAT0011815
AAACCUGAACGAAAUUUUUGGC
>bta-miR-6530 MIMAT0025566
CGCGGAGGAAGGUAAGACGG
>bta-miR-562 MIMAT0009349
AAAGCAGCUGUACCAUUUAC
>bta-miR-2288 MIMAT0011795
AGGUAGUAGGUGUGUGGUUU
>bta-miR-2436-3p MIMAT0012009
CCCGCCCGACCGCCUCGCCCAA
>bta-miR-2377 MIMAT0011923
ACUGCACAGACCUAGGCUCU
>bta-miR-29d-3p MIMAT0009275
UAGCACCAUUUGAAAUCGAUUA
>bta-miR-494 MIMAT0009334
UGAAACAUACACGGGAAACCUC
>bta-miR-487a MIMAT0003805
AAUCAUACAGGGACAUCCAGU
>bta-miR-2410 MIMAT0011968
CUGAGCUGAGGAGGACCUGUGA
>bta-miR-155 MIMAT0009241
UUAAUGCUAAUCGUGAUAGGGGU
>bta-miR-339b MIMAT0012038
UCCCUGUCCUCCAGGAGCUC
>bta-miR-656 MIMAT0009361
AAUAUUAUACAGUCAACCUCU
>bta-miR-2284ac MIMAT0030447
AAAUGUUCGCUUGGCUUUUUCC
>bta-miR-26b MIMAT0003531
UUCAAGUAAUUCAGGAUAGGUU
>bta-miR-24 MIMAT0009250
GUGCCUACUGAGCUGAUAUCAGU
>bta-miR-2882 MIMAT0013840
AGCCCGGGCCCCUCCCCUG
>bta-miR-301a MIMAT0009276
CAGUGCAAUAGUAUUGUCAAAGCAU
>bta-miR-574 MIMAT0024577
UGAGUGUGUGUGUGUGAGUGUGUG
>bta-miR-186 MIMAT0003818
CAAAGAAUUCUCCUUUUGGGCU
>bta-miR-302b MIMAT0009280
UAAGUGCUUCCAUGUUUUAGUAG
>bta-miR-2917 MIMAT0012885
AUGACUGACAUGGACU
>bta-miR-92a MIMAT0009383
UAUUGCACUUGUCCCGGCCUGU
>bta-miR-2284l MIMAT0011824
AAAAGUUGGUUCGGGUUUUU
>bta-miR-365-5p MIMAT0012539
AGGGACUUUUGGGGGCAGAUGUG
>bta-miR-190a MIMAT0009251
UGAUAUGUUUGAUAUAUUAGGU
>bta-miR-20b MIMAT0003796
CAAAGUGCUCACAGUGCAGGUA
>bta-miR-7859 MIMAT0030434
AAAAACUGGCAGCUUCAUGUAA
>bta-miR-429 MIMAT0009315
UAAUACUGUCUGGUAAUGCCGU
>bta-miR-2440 MIMAT0012015
UGCAGUGAUGAGACCCUGGA
>bta-miR-2434 MIMAT0012006
UUGUUGGGGUUUUUUUGUAU
>bta-miR-22-3p MIMAT0012536
AAGCUGCCAGUUGAAGAACUG
>bta-miR-2439-5p MIMAT0012013
UCUGGCCUGGCUGAUGAUCUCA
>bta-miR-2459 MIMAT0012044
GCCAGAUGAUGGGAGCUGAUU
>bta-miR-211 MIMAT0009263
UUCCCUUUGUCAUCCUUUGCC
>bta-miR-133b MIMAT0009226
UUUGGUCCCCUUCAACCAGCUA
>bta-miR-2420 MIMAT0011987
AGGUUGUGUGUUUAUUCUUU
>bta-miR-93 MIMAT0003837
CAAAGUGCUGUUCGUGCAGGUA
>bta-miR-7691 MIMAT0029952
GCUGAGAGGUCUAAUAACUA
>bta-miR-1224 MIMAT0009944
GUGAGGACUCGGGAGGUGGAG
>bta-miR-30a-5p MIMAT0003841
UGUAAACAUCCUCGACUGGAAGCU
>bta-miR-503-5p MIMAT0025557
UAGCAGCGGGAACAGUACUG
>bta-miR-6525 MIMAT0025554
CUGGGGAAAGCAGGAGUGAG
>bta-miR-2303 MIMAT0011814
UCUGAAUGAUGUCGACUGAUG
>bta-miR-2285v MIMAT0025579
AGAACCGGAACGAACUUUUUG
>bta-miR-2300a-5p MIMAT0011809
UCCUCAGCUAGUUUUGUCUCCC
>bta-miR-4523 MIMAT0036971
GACCGAGAGGGCCUCGGCUGU
>bta-miR-125b MIMAT0003539
UCCCUGAGACCCUAACUUGUGA
>bta-miR-1179 MIMAT0009957
AAGCAUUCUUUCAUUGGUUGG
>bta-miR-2290 MIMAT0011798
GCCUCUGGUGGUCGGUUUGU
>bta-miR-193a MIMAT0013837
GGGACUUUGUAGGCCAGUU
>bta-miR-451 MIMAT0009323
AAACCGUUACCAUUACUGAGUUU
>bta-miR-2394 MIMAT0011947
UUCUCCCCUCAAUCUCAGGACU
>bta-miR-376e MIMAT0025543
AACAUAGAGGAAAAUCCACAUU
>bta-miR-2307 MIMAT0011819
AGUGAUGAUGAACCCUCUGAGC
>bta-miR-4680 MIMAT0036979
AGAACUCUUGCAGUCUUAGAUGU
>bta-miR-3432a MIMAT0017396
UGCGGGAUCUUUAGUUGUGGUG
>bta-miR-184 MIMAT0009246
UGGACGGAGAACUGAUAAGGGU
>bta-miR-2427 MIMAT0011997
AGGUCAUUUCAAAGAGGGCUG
>bta-miR-483 MIMAT0009327
UCACUCCUCUCCUCCCGUCUU
>bta-miR-23b-5p MIMAT0012538
GGGUUCCUGGCAUGCUGAUUU
>bta-miR-2325b MIMAT0011927
AGGUUGUUUGGUUUUGUGUU
>bta-miR-449b MIMAT0009321
AGGCAGUGUAUUGUUAGCUGGC
>bta-miR-2450a MIMAT0012030
UGGGCAGUAGAGGUGCAUGUG
>bta-miR-2464-5p MIMAT0012051
ACUUCUGCUGCAGACCUGGAAGAC
>bta-miR-377 MIMAT0009304
AUCACACAAAGGCAACUUUUGU
>bta-miR-677 MIMAT0012003
CUCACUGAUGAGCAGCUUCUGAC
>bta-miR-369-3p MIMAT0003802
AAUAAUACAUGGUUGAUCUUU
>bta-miR-154a MIMAT0009240
UAGGUUAUCCGUGUAGCCUUCG
>bta-miR-769 MIMAT0009376
UGAGACCUCCGGGUUCUGAGCU
>bta-miR-381 MIMAT0009307
UAUACAAGGGCAAGCUCUCUGU
>bta-miR-323 MIMAT0009284
GCACAUUACACGGUCGACCUCU
>bta-miR-502a MIMAT0009338
AAUGCACCUGGGCAAGGAUUCA
>bta-miR-380-3p MIMAT0003804
UAUGUAAUGUGGUCCACGUCU
>bta-miR-875 MIMAT0009379
UAUACCUCAGUUUUAUCAGGUG
>bta-miR-2372 MIMAT0011917
GAAUGAUGAAAGGAUUGGGUCA
>bta-miR-2460 MIMAT0012045
UGGAGCUCUUGAGGCCUGGCAU
>bta-miR-4449 MIMAT0036973
CGUCCCGGGGCCGCUCGAGGCA
>bta-miR-2388-3p MIMAT0011941
GCUCGAGGAAGCUGGAGAUGA
>bta-miR-505 MIMAT0009341
CGUCAACACUUGCUGGUUUCCU
>bta-miR-551a MIMAT0009347
GCGACCCAAUCUUGGUUUCCA
>bta-miR-1388-3p MIMAT0013591
AUCUCAGGUUUGUCAGCCCGCA
>bta-miR-653 MIMAT0009358
GUGUUGAAACAAUCUCUGUUG
>bta-miR-2284v MIMAT0011937
AAAAAGUUCGUUUGGGGUUU
>bta-miR-421 MIMAT0009314
AUCAACAGACAUUAAUUGGGCGC
>bta-miR-326 MIMAT0009286
CCUCUGGGCCCUUCCUCCAG
>bta-miR-7860 MIMAT0030439
UGGAGCGGCUGCACAGAGCGU
>bta-miR-1814c MIMAT0011984
GUUUUGUUUGGGUUUGUUUU
>bta-miR-2403 MIMAT0011960
CUCGGGAAGCUAGCUGGCCUU
>bta-miR-146b MIMAT0009235
UGAGAACUGAAUUCCAUAGGCUGU
>bta-miR-30b-3p MIMAT0012534
CUGGGAGGUGGAUGUUUACUU
>bta-miR-2421 MIMAT0011988
UAUUUUUUUGUUUCGUGUUU
>bta-miR-670 MIMAT0009364
UCCCUGAGUAUAUGUGGUGAA
>bta-miR-6521 MIMAT0025539
GUGGCGCCAGCUCUGAGCAGAGU
>bta-miR-652 MIMAT0024578
AAUGGCGCCACUAGGGUUGUG
>bta-miR-2317 MIMAT0011838
CUCUGUGAUGACAAUACCUGAUA
>bta-miR-6528 MIMAT0025562
AGAGGGAAGAGGGAAGGAGG
>bta-let-7d MIMAT0003810
AGAGGUAGUAGGUUGCAUAGUU
>bta-miR-2308 MIMAT0011820
UUGGGCUUGCAGCAGAGAGUAA
>bta-miR-134 MIMAT0009227
UGUGACUGGUUGACCAGAGUGG
>bta-miR-2425-5p MIMAT0011994
CCAGGGCACGGAUCCAUGAACU
>bta-miR-2302 MIMAT0011813
GGAGCGGGUGCAGGACCCCGG
>bta-miR-302a MIMAT0009278
AAGUGCUUCCAUGUUUUAGUGA
>bta-miR-660 MIMAT0004344
UACCCAUUGCAUAUCGGAGCUG
>bta-miR-409b MIMAT0016935
GGGGUUCACCGAGCAACAUUC
>bta-let-7g MIMAT0003838
UGAGGUAGUAGUUUGUACAGUU
>bta-miR-7864 MIMAT0030449
CUUCCUCUUCCGGUUGGCAGA
>bta-miR-34c MIMAT0003854
AGGCAGUGUAGUUAGCUGAUUG
>bta-miR-2285u MIMAT0031094
GAAAAACCCGAACGAACUUU
>bta-miR-302d MIMAT0009279
UAAGUGCUUCCAUGUUUUAGU
>bta-miR-208b MIMAT0009262
AUAAGACGAACAAAAGGUUUGU
>bta-miR-2347 MIMAT0011882
UGCAGAGGAACAAGGCUGAAC
>bta-miR-411c-3p MIMAT0025546
UGUAUGUCAACUGAUCCACAGU
>bta-miR-599 MIMAT0009354
GUUGUGUCAGUUUAUCAAAC
>bta-miR-2284d MIMAT0011836
AAAAAGUUCGUUAGGGUUUUUC
>bta-miR-139 MIMAT0003788
UCUACAGUGCACGUGUCUCCAGU
>bta-miR-2457 MIMAT0012042
UUGCCAACUGCAGAGCCGCGCU
>bta-miR-1185 MIMAT0009973
AGAGGAUACCCUUUGUAUGUU
>bta-miR-2366 MIMAT0011904
UGGGUCACAGAAGAGGGUCUGG
>bta-miR-379 MIMAT0009306
UGGUAGACUAUGGAACGUAGG
>bta-miR-2380 MIMAT0011928
GUGACUGUACUUUAAAAGGUUA
>bta-miR-2284a MIMAT0011906
AAAAGUUCGUUGGGGUUUUU
>bta-miR-376b MIMAT0009945
AUCAUAGAGGAAAAUCCAUGUU
>bta-miR-296-3p MIMAT0009273
GAGGGUUGGGCGGAGGCUUUCC
>bta-miR-8550 MIMAT0033821
CAGGCUCUGGAACACGGGAGC
>bta-miR-2367-5p MIMAT0011909
ACCCUGUAACUCAGCCAUCAGAG
>bta-miR-2362 MIMAT0011900
CACUGUGAUGGAGCGUUCUGACC
>bta-miR-1256 MIMAT0009960
AGGCAUUGACUUCUCUCUAGAU
>bta-miR-2285x MIMAT0029946
GAAAAAUCUGAAUGAACUUUUGG
>bta-miR-2393 MIMAT0011946
UAGAUUUUUUGUUUUCUUUU
>bta-miR-2330-5p MIMAT0011861
UGGGCUUGGGCAGUGAGGACUGG
>bta-miR-6122-5p MIMAT0024594
UCAGUUGUACUUUAUCCAGUGC
>bta-miR-2414 MIMAT0011977
UGUGUUAGUGCGGAUGGUGUUA
>bta-miR-194 MIMAT0009254
UGUAACAGCAACUCCAUGUGGA
>bta-miR-2285m MIMAT0025533
AAAACGCAAAUGAACUUUUUGG
>bta-miR-29c MIMAT0003829
UAGCACCAUUUGAAAUCGGUUA
>bta-miR-2900 MIMAT0013858
AGGGCGGGCGGCGACUGGAA
>bta-let-7a-3p MIMAT0004330
CUAUACAAUCUACUGUCUUUC
>bta-miR-2355-5p MIMAT0011891
CCCAGAUACAAUGGACAAUAUGC
>bta-miR-2284h-3p MIMAT0012020
ACCCCAAUGAGCUUUUGACC
>bta-miR-2892 MIMAT0013850
GGCGACGGAGGCGCGACCCCCC
>bta-miR-19a MIMAT0004336
UGUGCAAAUCUAUGCAAAACUGA
>bta-miR-2295 MIMAT0011803
UCGGGGUGGGAGGAAGGUUCU
>bta-miR-197 MIMAT0009257
UUCACCACCUUCUCCACCCAGC
>bta-miR-2433 MIMAT0012005
UGGGGGCGCUGCAGACACGGAUG
>bta-miR-2957 MIMAT0016933
CCAAGUUCUGUCAUGCACUGA
>bta-miR-2439-3p MIMAT0012014
UAUCAGAAGACAGGUAGGCAGA
>bta-miR-2284m MIMAT0011976
GAAAAGUUUGUUCGGGUUUU
>bta-miR-2369 MIMAT0011913
GUAGGUUGUGGGUUUUUGUUU
>bta-miR-6516 MIMAT0030443
UUUGCAGUAACAGGUGUGAAC
>bta-miR-491 MIMAT0009332
AGUGGGGAACCCUUCCAUGAGG
>bta-miR-2325c MIMAT0011934
GGUUGUUUUUUUUCUUUUUC
>bta-miR-2450b MIMAT0012029
CAUGGUCAGUAGAGGUGCAUGUG
>bta-miR-2330-3p MIMAT0011862
ACUCCUUACCCCUGGCCGUC
>bta-miR-631 MIMAT0009357
AGACCUGGCUUAGACCUCAGC
>bta-miR-1260b MIMAT0024568
AUCCCACCACUGCCACCA
>bta-miR-2326 MIMAT0011855
CCCCCCUUCCUCUGGAAAAA
>bta-miR-2370-5p MIMAT0011914
UGGGAAAAUGAAAGUUGGUUAU
>bta-miR-761 MIMAT0009373
GCAGCAGGGUGAAACUGACACA
>bta-miR-2893 MIMAT0013851
GUGGAGGAGAAUGCCCGGGG
>bta-miR-2399-5p MIMAT0011954
CUUUCUGUAGCUGUUGGAACUA
>bta-miR-2889 MIMAT0013847
GUCCCCGGGGCUCCCGCCGGC
>bta-miR-495 MIMAT0009335
AAACAAACAUGGUGCACUUCUU
>bta-miR-2447 MIMAT0012024
UCUGGGAACCGGUUUGGCUGCU
>bta-miR-154c MIMAT0025542
AGAUAUUGCACGGUUGAUCUCU
>bta-miR-2355-3p MIMAT0011892
AUUGUCCUUGCUGUUUGGAGAU
>bta-miR-489 MIMAT0009942
GUGACAUCACAUAUAUGGCGAC
>bta-miR-1197 MIMAT0009966
UAGGACACAUGGUCUACUUCU
>bta-miR-1814b MIMAT0011908
AGAUUGUUUAGUUUUGUUUG
>bta-miR-2284w MIMAT0017393
AAGAGUUUGUUCGGGUUUCUC
>bta-miR-885 MIMAT0009382
UCCAUUACACUACCCUGCCUCU
>bta-miR-708 MIMAT0009367
AAGGAGCUUACAAUCUAGCUGGG
>bta-miR-2898 MIMAT0013856
UGGUGGAGAUGCCGGGGA
>bta-miR-2301 MIMAT0011812
GUGGUUUUGGUUUCCCUCUU
>bta-miR-2382-3p MIMAT0011931
CUACUUCCUGGUGCCUCGCCCCAC
>bta-miR-450a MIMAT0003834
UUUUGCGAUGUGUUCCUAAUAU
>bta-miR-2299-5p MIMAT0011807
ACUGGAUUCAUUUCUCUGAAA
>bta-miR-27a-3p MIMAT0003532
UUCACAGUGGCUAAGUUCCG
>bta-miR-320a MIMAT0003534
AAAAGCUGGGUUGAGAGGGCGA
>bta-miR-130b MIMAT0009224
CAGUGCAAUGAUGAAAGGGCAU
>bta-miR-30d MIMAT0003533
UGUAAACAUCCCCGACUGGAAGCU
>bta-miR-6533 MIMAT0025569
UGCGGCAGAGCAUUAGAGAAC
>bta-miR-30b-5p MIMAT0003547
UGUAAACAUCCUACACUCAGCU
>bta-miR-2402 MIMAT0011959
AUACCUGCCACUCUGCCAGCA
>bta-miR-2401 MIMAT0011958
AGAGCUUGUGUCUAGGGCUG
>bta-miR-2285aa MIMAT0030435
AAAACUGGAACGAACUUUUGGGC
>bta-miR-2285ae MIMAT0030448
AGAAAGUUCAUUUAGGUUUUUC
>bta-miR-2284n MIMAT0011846
AAAAAGUUUAUUCGGGUUUUU
>bta-miR-2411-3p MIMAT0011973
GCUGAACUGUCUUACUCCCACAUCC
>bta-miR-7857 MIMAT0030432
AUAGCCAGUUGGGGAAGAAUGC
>bta-miR-2346 MIMAT0011881
ACUGAUGUGAAGGUGGUUUGGC
>bta-miR-196b MIMAT0009256
UAGGUAGUUUCCUGUUGUUGGGA
>bta-miR-2285ab MIMAT0030436
AAAACCUGAAUGAACUUCUUGG
>bta-miR-2284c MIMAT0011926
AAAAAGUUCGUUUUGGUUUU
>bta-miR-328 MIMAT0009287
CUGGCCCUCUCUGCCCUUCCGU
>bta-miR-148a MIMAT0003522
UCAGUGCACUACAGAACUUUGU
>bta-miR-2389 MIMAT0011942
GAGGGGACUCGGGAGUCGGAG
>bta-miR-2339 MIMAT0011873
UCACUGGACCUAGCAGAGCU
>bta-miR-654 MIMAT0009359
UAUGUCUGCUGACCAUCACCUU
>bta-miR-26c MIMAT0016938
AGCCUAUCCUGGAUUACUUGAA
>bta-miR-2419-5p MIMAT0011985
AUCGCAUCAACACUCGUCUGUU
>bta-miR-2412 MIMAT0011974
UUGGGGCUGGGUGGGGAGAGGG
>bta-miR-378 MIMAT0009305
ACUGGACUUGGAGUCAGAAGGC
>bta-miR-568 MIMAT0009350
AUGUAUAAAUGUAUACACAC
>bta-miR-1251 MIMAT0009963
ACUCUAGCUGCCAAAGGCGCU
>bta-miR-2309 MIMAT0011821
UGUGAGGGUGGUGGACGGCAGGG
>bta-miR-22-5p MIMAT0003826
AGUUCUUCAGUGGCAAGCUUUA
>bta-miR-10a MIMAT0003786
UACCCUGUAGAUCCGAAUUUGUG
>bta-miR-153 MIMAT0009239
UUGCAUAGUCACAAAAGUGAUC
>bta-miR-371 MIMAT0009301
AAGUGCCGCCAUGUUUUGAGUGU
>bta-miR-2285b MIMAT0011833
AAAAUCUGAGUGAACUUUUUGG
>bta-miR-2286 MIMAT0011793
GAAGCAGGGCGGAACGAUGUGU
>bta-miR-412 MIMAT0009313
ACUUCACCUGGUCCACUAGCUGU
>bta-miR-34b MIMAT0003549
AGGCAGUGUAAUUAGCUGAUUG
>bta-miR-6535 MIMAT0025571
UAGGGGGAGCGGUUGGAGGACU
>bta-miR-2422 MIMAT0011989
UUGAGGGGACUGAGGUGCGGAG
>bta-miR-223 MIMAT0009270
UGUCAGUUUGUCAAAUACCCCA
>bta-miR-592 MIMAT0009353
AUUGUGUCAAUAUGCGAUGAUGU
>bta-miR-2467-5p MIMAT0012056
ACCCCAAGCCUGGCUGCUACCU
>bta-miR-2415-3p MIMAT0011979
CCAGGCCUGCUGGACCGACGC
>bta-miR-2363 MIMAT0011901
UCAACUUGGUCAAGGAAUAUUU
>bta-miR-7863 MIMAT0030445
AUGGACUGUCACCUGAGGAGC
>bta-miR-154b MIMAT0025547
AGAGGUCUUCCAUGGUGCAUUCG
>bta-miR-2485 MIMAT0012079
UUUCUAGAAUCUGCAGGUAGU
>bta-miR-331-5p MIMAT0026716
UCUAGGUAUGGUCCCAGG
>bta-miR-346 MIMAT0009297
UGUCUGCCCGCAUGCCUGCCUCU
>bta-miR-361 MIMAT0003830
UUAUCAGAAUCUCCAGGGGUAC
>bta-miR-145 MIMAT0003542
GUCCAGUUUUCCCAGGAAUCCCU
>bta-miR-6520 MIMAT0025538
UUGAGUAUUGUCAGAGAGAGC
>bta-miR-3613a MIMAT0024574
UGUUGUACUUUUUUUUUUGUUC
>bta-miR-2375 MIMAT0011921
CCCAGUGAUGGAGAGGUCUGAUC
>bta-miR-2332 MIMAT0011865
CGGUUUAAGGUCUUGGAGACAAAG
>bta-miR-338 MIMAT0009292
UCCAGCAUCAGUGAUUUUGUUGA
>bta-miR-1 MIMAT0009214
UGGAAUGUAAAGAAGUAUGUAU
>bta-miR-425-3p MIMAT0003833
AUCGGGAAUGUCGUGUCCGCCC
>bta-miR-449a MIMAT0009320
UGGCAGUGUAUUGUUAGCUGGU
>bta-miR-544a MIMAT0009346
AUUCUGCAUUUUUAGCAAGUUC
>bta-miR-193a-3p MIMAT0003795
AACUGGCCUACAAAGUCCCAGU
>bta-miR-2361 MIMAT0011899
GUUGUGUUGUUUUUUUUUGU
>bta-miR-449d MIMAT0011962
GAAGGCUGUGUGCUGUGGAG
>bta-miR-1343-3p MIMAT0011840
CUCCUGGGGCCCGCACUCUC
>bta-miR-2313-3p MIMAT0011830
CCAGUUCCACGCUGCAUGCC
>bta-miR-2479 MIMAT0012071
AGUUUGUAUUGUUUCUUUUG
>bta-let-7f MIMAT0003519
UGAGGUAGUAGAUUGUAUAGUU
>bta-miR-16a MIMAT0009242
UAGCAGCACGUAAAUAUUGGUG

## Sheet: S-1 overlapping data
>bta-miR-148a MIMAT0003522	UCAGUGCACUACAGAACUUUGU		>oar-miR-148a MIMAT0030033	UCAGUGCACUACAGAACUUUGU
>bta-miR-299 MIMAT0009274	UGGUUUACCGUCCCACAUACAU		>oar-miR-299-5p MIMAT0019251	UGGUUUACCGUCCCACAUACAU
>bta-let-7c MIMAT0004332	UGAGGUAGUAGGUUGUAUGGUU		>oar-let-7c MIMAT0014964	UGAGGUAGUAGGUUGUAUGGUU
>bta-miR-19b MIMAT0004337	UGUGCAAAUCCAUGCAAAACUGA		>oar-miR-19b MIMAT0030041	UGUGCAAAUCCAUGCAAAACUGA
>bta-miR-655 MIMAT0009360	AUAAUACAUGGUUAACCUCUCU		>oar-miR-655-3p MIMAT0019301	AUAAUACAUGGUUAACCUCUCU
>bta-miR-362-5p MIMAT0009298	AAUCCUUGGAACCUAGGUGUGAGU		>oar-miR-362 MIMAT0030060	AAUCCUUGGAACCUAGGUGUGAGU
>bta-miR-136 MIMAT0009230	ACUCCAUUUGUUUUGAUGAUGGA		>oar-miR-136 MIMAT0001417	ACUCCAUUUGUUUUGAUGAUGGA
>bta-miR-376d MIMAT0010199	AUCAUAGAGGAAAAUCCACAU		>oar-miR-376d MIMAT0019281	AUCAUAGAGGAAAAUCCACAU
>bta-miR-200b MIMAT0003842	UAAUACUGCCUGGUAAUGAUG		>oar-miR-200b MIMAT0030043	UAAUACUGCCUGGUAAUGAUG
>bta-miR-369-3p MIMAT0003802	AAUAAUACAUGGUUGAUCUUU		>oar-miR-369-3p MIMAT0019332	AAUAAUACAUGGUUGAUCUUU
>bta-let-7a-5p MIMAT0003844	UGAGGUAGUAGGUUGUAUAGUU		>oar-let-7a MIMAT0030022	UGAGGUAGUAGGUUGUAUAGUU
>bta-miR-411a MIMAT0009312	AUAGUAGACCGUAUAGCGUACG		>oar-miR-411a-5p MIMAT0019249	AUAGUAGACCGUAUAGCGUACG
>bta-miR-411c-3p MIMAT0025546	UGUAUGUCAACUGAUCCACAGU		>oar-miR-3959-3p MIMAT0019303	UGUAUGUCAACUGAUCCACAGU
>bta-miR-411c-5p MIMAT0025545	GGUUGAUCAGAGAACAUACAUU		>oar-miR-3959-5p MIMAT0019302	GGUUGAUCAGAGAACAUACAUU
>bta-miR-382 MIMAT0009308	GAAGUUGUUCGUGGUGGAUUCG		>oar-miR-382-5p MIMAT0019306	GAAGUUGUUCGUGGUGGAUUCG
>bta-miR-433 MIMAT0009318	AUCAUGAUGGGCUCCUCGGUGU		>oar-miR-433-3p MIMAT0019242	AUCAUGAUGGGCUCCUCGGUGU
>bta-miR-107 MIMAT0003785	AGCAGCAUUGUACAGGGCUAUC		>oar-miR-107 MIMAT0030029	AGCAGCAUUGUACAGGGCUAUC
>bta-miR-431 MIMAT0009316	UGUCUUGCAGGCCGUCAUGCAGG		>oar-miR-431 MIMAT0001414	UGUCUUGCAGGCCGUCAUGCAGG
>bta-miR-154a MIMAT0009240	UAGGUUAUCCGUGUAGCCUUCG		>oar-miR-154a-5p MIMAT0019315	UAGGUUAUCCGUGUAGCCUUCG
>bta-miR-26a MIMAT0003516	UUCAAGUAAUCCAGGAUAGGCU		>oar-miR-26a MIMAT0030051	UUCAAGUAAUCCAGGAUAGGCU
>bta-miR-1197 MIMAT0009966	UAGGACACAUGGUCUACUUCU		>oar-miR-1197-3p MIMAT0019258	UAGGACACAUGGUCUACUUCU
>bta-let-7i MIMAT0003851	UGAGGUAGUAGUUUGUGCUGUU		>oar-let-7i MIMAT0030026	UGAGGUAGUAGUUUGUGCUGUU
>bta-miR-493 MIMAT0009333	UGAAGGUCUACUGUGUGCCAGG		>oar-miR-493-3p MIMAT0019238	UGAAGGUCUACUGUGUGCCAGG
>bta-miR-154c MIMAT0025542	AGAUAUUGCACGGUUGAUCUCU		>oar-miR-3958-3p MIMAT0019276	AGAUAUUGCACGGUUGAUCUCU
>bta-miR-380-3p MIMAT0003804	UAUGUAAUGUGGUCCACGUCU		>oar-miR-380-3p MIMAT0019254	UAUGUAAUGUGGUCCACGUCU
>bta-miR-409a MIMAT0009310	AGGUUACCCGAGCAACUUUGCAU		>oar-miR-409-5p MIMAT0019327	AGGUUACCCGAGCAACUUUGCAU
>bta-miR-194 MIMAT0009254	UGUAACAGCAACUCCAUGUGGA		>oar-miR-194 MIMAT0030039	UGUAACAGCAACUCCAUGUGGA
>bta-miR-432 MIMAT0009317	UCUUGGAGUAGGUCAUUGGGUGG		>oar-miR-432 MIMAT0001416	UCUUGGAGUAGGUCAUUGGGUGG
>bta-miR-411b MIMAT0025541	UGGUCGACCAUAAAACGUACGU		>oar-miR-411b-5p MIMAT0019255	UGGUCGACCAUAAAACGUACGU
>bta-miR-410 MIMAT0009311	AAUAUAACACAGAUGGCCUGU		>oar-miR-410-3p MIMAT0019334	AAUAUAACACAGAUGGCCUGU
>bta-miR-376e MIMAT0025543	AACAUAGAGGAAAAUCCACAUU		>oar-miR-376e-3p MIMAT0019278	AACAUAGAGGAAAAUCCACAUU
>bta-miR-376a MIMAT0009946	AUCAUAGAGGAAAAUCCACGU		>oar-miR-376a-3p MIMAT0019287	AUCAUAGAGGAAAAUCCACGU
>bta-miR-485 MIMAT0009328	AGAGGCUGGCCGUGAUGAAUUCG		>oar-miR-485-5p MIMAT0019312	AGAGGCUGGCCGUGAUGAAUUCG
>bta-miR-495 MIMAT0009335	AAACAAACAUGGUGCACUUCUU		>oar-miR-495-3p MIMAT0019274	AAACAAACAUGGUGCACUUCUU
>bta-miR-106b MIMAT0009218	UAAAGUGCUGACAGUGCAGAU		>oar-miR-106b MIMAT0030028	UAAAGUGCUGACAGUGCAGAU
>bta-miR-23a MIMAT0003827	AUCACAUUGCCAGGGAUUUCCA		>oar-miR-23a MIMAT0030048	AUCACAUUGCCAGGGAUUUCCA
>bta-miR-487b MIMAT0003847	AAUCGUACAGGGUCAUCCACUU		>oar-miR-487b-3p MIMAT0019295	AAUCGUACAGGGUCAUCCACUU
>bta-miR-374a MIMAT0004342	UUAUAAUACAACCUGAUAAGUG		>oar-miR-374a MIMAT0030062	UUAUAAUACAACCUGAUAAGUG
>bta-miR-154b MIMAT0025547	AGAGGUCUUCCAUGGUGCAUUCG		>oar-miR-154b-5p MIMAT0019317	AGAGGUCUUCCAUGGUGCAUUCG
>bta-miR-22-3p MIMAT0012536	AAGCUGCCAGUUGAAGAACUG		>oar-miR-22-3p MIMAT0030046	AAGCUGCCAGUUGAAGAACUG
>bta-miR-221 MIMAT0003529	AGCUACAUUGUCUGCUGGGUUU		>oar-miR-221 MIMAT0030047	AGCUACAUUGUCUGCUGGGUUU
>bta-miR-329a MIMAT0009288	AACACACCUGGUUAACCUUUUU		>oar-miR-329a-3p MIMAT0019266	AACACACCUGGUUAACCUUUUU

## Sheet: S-1  screening
				sample:peak-lactation						sample:dry-lactation						fold change
Group		mature name	mature sequence	CT1	CT2	SD	AVG	△CT	2^-△CT	CT1	CT2	SD	AVG	△CT	2^-△CT				peak/dry	log	p-value
1		>oar-miR-412-5p MIMAT0019330	CUUCACCUGGUCCACUAGCU	32.355	31.41	0.67	31.88	5.3	0.0254	31.385	32.126	0.52	31.76	5.41	0.0236				0.928195	-0.1075	0.85208
1		>bta-miR-2897 MIMAT0013855	GGUGGGAGGGUCCCACCGAG	30.382	29.538	0.6	29.96	3.38	0.0964	28.26	28.324	0.05	28.29	1.94	0.2603				2.70101	1.4335	0.05876
1		>bta-miR-2285t MIMAT0025577	AGAAUCUGGAUGAACUUUUUGG	36.142	35.007	0.8	35.57	8.99	0.002	35.996	35.882	0.08	35.94	9.59	0.0013				0.660211	-0.599	0.5882
1		>bta-miR-2454-5p MIMAT0012035	CUGGGGGCUGCCAGGCAGGAGGC	26.878	26.653	0.16	26.77	0.18	0.8821	26.047	26.157	0.08	26.1	-0.25	1.1876				1.3463	0.429	0.03382
1		>bta-miR-669 MIMAT0013838	UGUGGGUGUGUGCAUGUGCGUG	25.54	25.485	0.04	25.51	-1.07	2.1023	25.057	25.316	0.18	25.19	-1.16	2.24				1.06548	0.0915012	0.13283
1		>bta-miR-2345 MIMAT0011880	GUUGUGUGUUUUCUUAUUUC	29.87	29.551	0.23	29.71	3.13	0.1145	32.882	32.92	0.03	32.9	6.55	0.0107				0.093105	-3.425	0.00253
1		18s		26.571	26.598	0.02	26.58	0	1	26.275	26.425	0.11	26.35	0	1				1	0	0.09136
2		>bta-miR-2339 MIMAT0011873	UCACUGGACCUAGCAGAGCU	30.09	29.855	0.17	29.97	3.42	0.0934	33.295	34.072	0.55	33.68	7.42	0.0058				0.0625651	-3.9985	0.01175
2		>bta-miR-92b MIMAT0009384	UAUUGCACUCGUCCCGGCCUCC	24.086	23.783	0.21	23.93	-2.62	6.139	23.988	23.711	0.2	23.85	-2.42	5.335				0.869043	-0.2025	0.71899
2		>bta-miR-2313-3p MIMAT0011830	CCAGUUCCACGCUGCAUGCC	28.22	28.231	0.01	28.23	1.67	0.3136	32.156	31.899	0.18	32.03	5.76	0.0184				0.0587405	-4.0895	0.00114
2		>bta-miR-2411-3p MIMAT0011973	GCUGAACUGUCUUACUCCCACAUCC	23.378	23.541	0.12	23.46	-3.09	8.5327	24.278	24.243	0.02	24.26	-2	4.0125				0.47025	-1.0885	0.01066
2		>bta-miR-2336 MIMAT0011869	CUAACCGUAACUUUGAAGUGCU	30.945	30.178	0.54	30.56	4.01	0.0621	33.781	36.821	2.15	33.78	7.52	0.0055				0.0879606	-3.507	0.0942
2		>bta-miR-2285r MIMAT0025575	AGAAACCUGGAUGAACUUUUUGG	32.954	32.689	0.19	32.82	6.27	0.013	33.59	33.469	0.09	33.53	7.26	0.0065				0.501561	-0.995502	0.03981
2		18s		26.532	26.573	0.03	26.55	0	1	26.47	26.06	0.29	26.26	0	1				1	0	0.29762
3		>bta-miR-365-3p MIMAT0004341	UAAUGCCCCUAAAAAUCCUUAU	25.16	25.094	0.05	25.13	-1.28	2.4301	23.962	23.922	0.03	23.94	-3.1	8.5891				3.53448	1.8215	0.00106
3		>oar-miR-27a MIMAT0030053	UUCACAGUGGCUAAGUUCCGC	20.012	20.131	0.08	20.07	-6.34	80.8122	20.123	20.112	0.01	20.12	-6.93	121.684				1.50577	0.5905	0.5219
3		>bta-miR-4444 MIMAT0036978	CUCGAGUUGGAAGAGGCG	33.524	32.479	0.74	33	6.59	0.0104	34.304	34.458	0.11	34.38	7.34	0.0062				0.597495	-0.743002	0.12062
3		>bta-miR-2416 MIMAT0011980	UGCAGUGCCCACUGUGGAAGAUG	30.362	27.837	1.79	29.1	2.69	0.1548	30.373	30.839	0.33	30.61	3.56	0.0847				0.547147	-0.870001	0.36144
3		>bta-miR-2419-5p MIMAT0011985	AUCGCAUCAACACUCGUCUGUU	30.649	29.332	0.93	29.99	3.58	0.0835	35.111	36.485	0.97	35.8	8.75	0.0023				0.0277571	-5.171	0.02582
4		>bta-miR-2284n MIMAT0011846	AAAAAGUUUAUUCGGGUUUUU	30.341	30.567	0.16	30.45	3.9	0.0668	36.352	37.229	0.62	36.79	10.17	0.0009				0.0130347	-6.2615	0.00507
4		>bta-miR-1224 MIMAT0009944	GUGAGGACUCGGGAGGUGGAG	28.911	28.848	0.04	28.88	2.33	0.1988	30.223	29.978	0.17	30.1	3.48	0.0898				0.451876	-1.146	0.01056
4		>bta-miR-33b MIMAT0009295	GUGCAUUGCUGUUGCAUUGC	29.914	29.864	0.04	29.89	3.34	0.0988	32.405	32.426	0.01	32.42	5.79	0.0181				0.182821	-2.4515	0.00012
4		>oar-miR-377-3p MIMAT0019322	AUCACACAAAGGCAACUUUCGU	32.554	32.528	0.02	32.54	5.99	0.0157	33.968	32.986	0.69	33.48	6.85	0.0087				0.550572	-0.860998	0.19697
4		>oar-miR-154b-5p MIMAT0019317	AGAGGUCUUCCAUGGUGCAUUCG	27.624	27.651	0.02	27.64	1.09	0.4703	27.807	27.673	0.09	27.74	1.12	0.4614				0.98112	-0.0274992	0.27246
4		>bta-miR-2323 MIMAT0011852	UGACCUGAUCAUGCUUACUGAGC	30.575	30.473	0.07	30.52	3.98	0.0636	37.713	36.956	0.54	37.33	10.71	0.0006				0.00938453	-6.7355	0.00313
5		>oar-miR-665-5p MIMAT0019239	AGGGGUCUUGGCCUCUGCCCAG	29.585	29.99	0.29	29.79	2.95	0.1291	31.283	31.567	0.2	31.43	4.63	0.0404				0.312841	-1.6765	0.02206
5		>bta-miR-188 MIMAT0009249	CAUCCCUUGCAUGGUGGAGGGU	30.418	30.421	0	30.42	3.59	0.0833	31.048	31.024	0.02	31.04	4.24	0.0529				0.634855	-0.6555	0.00038
5		>bta-miR-652 MIMAT0024578	AAUGGCGCCACUAGGGUUGUG	25.171	25.199	0.02	25.18	-1.65	3.1372	25.46	25.421	0.03	25.44	-1.36	2.558				0.815355	-0.294499	0.00871
5		>oar-miR-154b-3p MIMAT0019318	AAUCAUACAUGGUUGACCUUUUU	34.36	34.204	0.11	34.28	7.45	0.0057	36.419	36.01	0.29	36.21	9.42	0.0015				0.254988	-1.9715	0.01259
5		>bta-miR-199b MIMAT0003821	CCCAGUGUUUAGACUAUCUGUUC	25.155	25.203	0.03	25.18	-1.66	3.1503	23.506	23.473	0.02	23.49	-3.31	9.8902				3.13942	1.6505	0.0003
5		>oar-miR-22-3p MIMAT0030046	AAGCUGCCAGUUGAAGAACUG	21.339	21.39	0.04	21.36	-5.47	44.3235	23.241	23.224	0.01	23.23	-3.56	11.8187				0.266647	-1.907	0.00021
5		18s		26.827	26.842	0.01	26.83	0	1	26.838	26.753	0.06	26.8	0	1				1	0	0.46154
6		>bta-miR-29c MIMAT0003829	UAGCACCAUUUGAAAUCGGUUA	21.318	21.376	0.04	21.35	-5.53	46.0618	20.951	20.971	0.01	20.96	-5.79	55.1963				1.19831	0.261001	0.00626
6		>bta-miR-2900 MIMAT0013858	AGGGCGGGCGGCGACUGGAA	22.638	22.68	0.03	22.66	-4.21	18.552	24.11	23.979	0.09	24.04	-2.7	6.5115				0.35099	-1.5105	0.00246
6		>bta-miR-186 MIMAT0003818	CAAAGAAUUCUCCUUUUGGGCU	27.581	27.712	0.09	27.65	0.77	0.5848	28.277	28.262	0.01	28.27	1.52	0.3482				0.595429	-0.747999	0.01101
6		>bta-miR-873 MIMAT0009377	GCAGGAACUUGUGAGUCUCCU	34.82	34.333	0.34	34.58	7.7	0.0048	33.554	33.75	0.14	33.65	6.9	0.0083				1.7405	0.7995	0.07201
6		>bta-miR-2284v MIMAT0011937	AAAAAGUUCGUUUGGGGUUU	33.088	33.259	0.12	33.17	6.3	0.0127	35.416	35.265	0.11	35.34	8.59	0.0026				0.204192	-2.292	0.00276
6		>bta-miR-206 MIMAT0009260	UGGAAUGUAAGGAAGUGUGUGG	35.774	34.405	0.97	35.09	8.22	0.0034	32.542	29.594	2.08	32.54	5.79	0.018				5.36099	2.4225	0.13179
6		>bta-miR-496 MIMAT0009336	UGAGUAUUACAUGGCCAAUCUC	31.131	26.097	3.56	31.13	4.26	0.0522	Undetermined	32.279	#DIV/0!	32.28	5.53	0.0216				0.413799	-1.273	#DIV/0!
6		18s		26.886	26.859	0.02	26.87	0	1	26.857	26.638	0.15	26.75	0	1				1	0	0.37477
7		>bta-miR-2284u MIMAT0011895	AAAAGUUCGUUCGGUUUUUCU	33.71	34.62	0.64	34.16	6.9	0.0084	34.083	34.418	0.24	34.25	5.82	0.0177				2.11844	1.083	0.87626
7		>oar-miR-655-5p MIMAT0019300	AGAGGUUAUCCGUGUUAUGUUC	34.479	34.019	0.33	34.25	6.99	0.0079	34.208	34.336	0.09	34.27	5.84	0.0174				2.21223	1.1455	0.93204
7		>bta-miR-763 MIMAT0009374	CCAGCUGGGAGGAACCAGUGGC	30.362	30.4	0.03	30.38	3.12	0.1151	30.711	30.539	0.12	30.63	2.19	0.2184				1.89803	0.9245	0.10934
7		>bta-miR-98 MIMAT0003809	UGAGGUAGUAAGUUGUAUUGUU	20.423	20.42	0	20.42	-6.84	114.563	20.84	20.958	0.08	20.9	-7.53	184.951				1.6144	0.691	0.01494
7		>bta-miR-6122-5p MIMAT0024594	UCAGUUGUACUUUAUCCAGUGC	37.433	37.287	0.1	37.36	10.1	0.0009	36.501	36.888	0.27	36.69	8.26	0.0033				3.56524	1.834	0.08451
7		>bta-miR-155 MIMAT0009241	UUAAUGCUAAUCGUGAUAGGGGU	25.029	25.03	0	25.03	-2.23	4.6978	23.043	23.03	0.01	23.04	-5.39	42.0345				8.9476	3.1615	1e-05
7		>bta-miR-132 MIMAT0003812	UAACAGUCUACAGCCAUGGUCG	29.098	28.958	0.1	29.03	1.77	0.2939	27.119	27.119	0	27.12	-1.31	2.4811				8.44151	3.0775	0.00134
7		18s		27.288	27.235	0.04	27.26	0	1	28.455	28.405	0.04	28.43	0	1				1	0	0.00097
8		>bta-miR-2325c MIMAT0011934	GGUUGUUUUUUUUCUUUUUC	36.7157	34.5749	1.51	35.65	-0.87	1.8233	36.5372	33.6356	2.05	35.09	0	0.9981				0.547403	-0.869324	0.78589
8		>oar-miR-106b MIMAT0030028	UAAAGUGCUGACAGUGCAGAU	26.2285	26.2142	0.01	26.22	-10.29	1252.43	24.8444	24.7756	0.05	24.81	-10.27	1237.88				0.988384	-0.0168571	0.00062
8		>bta-miR-34c MIMAT0003854	AGGCAGUGUAGUUAGCUGAUUG	35.7519	35.8986	0.1	35.83	-0.69	1.6095	36.9452	35.9629	0.69	36.45	1.37	0.3868				0.240311	-2.05702	0.33297
8		>bta-miR-20a MIMAT0003527	UAAAGUGCUUAUAGUGCAGGUAG	25.8639	25.8586	0	25.86	-10.65	1607.5	24.3333	24.1419	0.14	24.24	-10.85	1840.71				1.14507	0.19544	0.00346
8		>bta-miR-128 MIMAT0003541	UCACAGUGAACCGGUCUCUUU	29.5829	29.4058	0.13	29.49	-7.02	129.564	28.8442	28.9722	0.09	28.91	-6.18	72.2771				0.55785	-0.84205	0.03303
8		>bta-let-7f MIMAT0003519	UGAGGUAGUAGAUUGUAUAGUU	22.9499	22.964	0.01	22.96	-13.55	12034.6	21.8223	21.7041	0.08	21.76	-13.32	10229.4				0.849993	-0.234477	0.00248
8		>bta-miR-202 MIMAT0009259	UUCCUAUGCAUAUACUUCUUU	34.2473	34.2528	0	34.25	-2.26	4.7959	35.955	35.5868	0.26	35.77	0.69	0.621				0.129491	-2.94908	0.01434
8		18s		35.9968	37.0269	0.73	36.51	0	1	35.3538	34.8135	0.38	35.08	0	1				1	0	0.13342
9		>bta-miR-346 MIMAT0009297	UGUCUGCCCGCAUGCCUGCCUCU	32.1512	32.3541	0.14	32.25	3.25	0.1055	31.94	31.4388	0.35	31.69	2.74	0.1492				1.41434	0.500133	0.17264
9		>bta-miR-27a-5p MIMAT0012532	AGGGCUUAGCUGCUUGUGAGCA	33.9432	33.9605	0.01	33.95	4.94	0.0325	32.3712	32.4892	0.08	32.43	3.49	0.0893				2.74837	1.45858	0.00153
9		>bta-miR-2893 MIMAT0013851	GUGGAGGAGAAUGCCCGGGG	36.5932	36.3258	0.19	36.46	7.45	0.0057	34.2847	34.1646	0.08	34.22	5.28	0.0257				4.50579	2.17178	0.00427
9		>bta-miR-3578 MIMAT0016934	GAAUCCACCACGAACAACUUC	37.0947	36.305	0.56	36.7	7.69	0.0048	34.7856	35.3672	0.41	35.08	6.13	0.0143				2.94919	1.56032	0.08041
9		>bta-miR-2353 MIMAT0011889	UAGCCUGCAGUACAGAGGACUGG	31.2673	31.4991	0.16	31.38	2.38	0.1927	29.6025	29.2575	0.24	29.43	0.49	0.7142				3.7065	1.89006	0.01113
9		>bta-miR-193b MIMAT0009253	AACUGGCCCACAAAGUCCCGCUUU	29.3656	29.3302	0.03	29.35	0.34	0.7899	27.8819	27.8282	0.04	27.86	-1.09	2.1278				2.69392	1.42971	0.00046
9		>bta-miR-2457 MIMAT0012042	UUGCCAACUGCAGAGCCGCGCU	30.9551	30.9576	0	30.96	1.95	0.259	30.8375	30.698	0.1	30.77	1.82	0.2826				1.09086	0.125464	0.114
9		18s		29.0495	28.9655	0.06	29.01	0	1	28.9135	28.9753	0.04	28.94	0	1				1	0	0.34976
10		>bta-miR-2383 MIMAT0011932	CUGAGUGAUGACUGCUGACC	33.8769	33.777	0.07	33.83	4.35	0.0491	32.5547	32.59	0.02	32.57	3.43	0.0926				1.88435	0.914064	0.00178
10		>bta-miR-421 MIMAT0009314	AUCAACAGACAUUAAUUGGGCGC	34.7798	34.9794	0.14	34.88	5.4	0.0237	32.6747	32.6711	0	32.67	3.53	0.0863				3.64534	1.86605	0.00204
10		>bta-miR-2294 MIMAT0011802	GAGGCUGUAGAGGGCAUCUGCU	31.2701	31.2373	0.02	31.25	1.77	0.2923	30.6235	30.1507	0.33	30.39	1.25	0.4209				1.4399	0.525972	0.06732
10		>bta-miR-183 MIMAT0009245	UAUGGCACUGGUAGAAUUCACUG	32.9213	32.9348	0.01	32.93	3.45	0.0916	29.5222	29.3375	0.13	29.43	0.29	0.8173				8.92339	3.15759	0.0007
10		>bta-miR-33a MIMAT0009294	GUGCAUUGUAGUUGCAUUGCA	28.0644	28.1501	0.06	28.11	-1.37	2.5885	32.7803	32.9699	0.13	32.88	3.74	0.075				0.0289878	-5.10841	0.00048
10		>bta-miR-2285x MIMAT0029946	GAAAAAUCUGAAUGAACUUUUGG	35.5026	35.9508	0.32	35.73	6.25	0.0132	33.9804	34.0927	0.08	34.04	4.9	0.0335				2.54848	1.34964	0.01817
10		>bta-miR-338 MIMAT0009292	UCCAGCAUCAGUGAUUUUGUUGA	28.2855	28.2178	0.05	28.25	-1.23	2.342	28.6853	28.5836	0.07	28.63	-0.5	1.4185				0.605692	-0.723343	0.02451
10		18s		29.4098	29.549	0.1	29.48	0	1	29.1211	29.1565	0.02	29.14	0	1				1	0	0.04171
11		>bta-miR-2338 MIMAT0011872	AGGCUGAGGACAGGGGCUGACGU	27.0582	26.8417	0.15	26.95	-2.03	4.0956	25.8137	26.1235	0.22	25.97	-3.01	8.0498				1.96545	0.974862	0.03514
11		>bta-miR-2434 MIMAT0012006	UUGUUGGGGUUUUUUUGUAU	35.9555	35.1279	0.59	35.54	6.56	0.0106	35.8511	35.978	0.09	35.91	6.94	0.0082				0.768793	-0.379333	0.46714
11		>bta-miR-181c MIMAT0003817	AACAUUCAACCUGUCGGUGAGUUU	27.4137	27.3848	0.02	27.4	-1.58	2.9996	27.6552	27.5618	0.07	27.61	-1.37	2.583				0.861112	-0.215728	0.05043
11		>bta-miR-17-5p MIMAT0003815	CAAAGUGCUUACAGUGCAGGUAGU	26.7741	26.7879	0.01	26.78	-2.2	4.6045	25.7541	25.7588	0	25.76	-3.22	9.3253				2.02528	1.01812	5e-05
11		>bta-miR-2296 MIMAT0011804	UGGACAACUGAGGUUCCUGCU	36.4294	36.02	0.29	36.22	7.24	0.0066	35.4723	35.9462	0.34	35.71	6.73	0.0094				1.42304	0.508978	0.24144
11		>bta-miR-218 MIMAT0003798	UUGUGCUUGAUCUAACCAUGUG	29.4071	Undetermined	#DIV/0!	29.41	0.42	0.7459	26.8889	26.9706	0.06	26.93	-2.05	4.1348				5.54369	2.47085	#DIV/0!
11		>bta-miR-2284h-3p MIMAT0012020	ACCCCAAUGAGCUUUUGACC	34.7955	34.9572	0.11	34.88	5.89	0.0168	35.4399	35.3868	0.04	35.41	6.44	0.0116				0.686112	-0.543484	0.0242
11		18s		28.9895	28.9787	0.01	28.98	0	1	28.9897	28.9654	0.02	28.98	0	1				1	0	0.67347
12		>bta-miR-449c MIMAT0009322	AGGCAGUGCAUCUCUAGCUGG	30.592	30.125	0.33	30.36	1.99	0.2525	33.515	33.209	0.22	33.36	6.3	0.0127				0.0503802	-4.311	0.00853
12		>bta-miR-1247-5p MIMAT0025549	ACCCGUCCCGUGCGUCCCCGGA	27.633	28.275	0.45	27.95	-0.42	1.337	27.608	27.52	0.06	27.56	0.5	0.7078				0.529426	-0.9175	0.35185
12		>bta-miR-138 MIMAT0003813	AGCUGGUGUUGUGAAUCAGGCCG	32.268	32.277	0.01	32.27	3.9	0.067	28.407	28.335	0.05	28.37	1.31	0.4046				6.03772	2.594	9e-05
12		>bta-miR-455-3p MIMAT0003836	GCAGUCCAUGGGCAUAUACACU	29.535	29.55	0.01	29.54	1.17	0.4446	25.991	25.625	0.26	25.81	-1.26	2.3908				5.37774	2.427	0.0024
12		>oar-miR-17-5p MIMAT0030037	CAAAGUGCUUACAGUGCAGGUA	27.588	27.654	0.05	27.62	-0.75	1.6841	23.508	23.518	0.01	23.51	-3.55	11.733				6.96682	2.8005	7e-05
12		>bta-miR-2342 MIMAT0011877	CUCUGCGGAAGUUGGCGCUUU	34.085	34.016	0.05	34.05	5.68	0.0195	32.346	32.159	0.13	32.25	5.19	0.0275				1.40493	0.490499	0.00306
12		>bta-miR-2447 MIMAT0012024	UCUGGGAACCGGUUUGGCUGCU	Undetermined	36.447	#DIV/0!	36.45	8.07	0.0037	35.201	34.261	0.66	34.73	7.67	0.0049				1.3273	0.408499	#DIV/0!
12		18s		28.404	28.342	0.04	28.37	0	1	27.09	27.041	0.03	27.07	0	1				1	0	0.00091
13		>bta-miR-30a-5p MIMAT0003841	UGUAAACAUCCUCGACUGGAAGCU	22.953	22.96	0	22.96	-7.13	139.682	23.805	23.981	0.12	23.89	-6.14	70.3754				0.503826	-0.989001	0.00873
13		>oar-miR-3958-3p MIMAT0019276	AGAUAUUGCACGGUUGAUCUCU	Undetermined	Undetermined	#DIV/0!	#DIV/0!	#DIV/0!	#DIV/0!	31.364	31.044	0.23	31.2	1.17	0.4432				#DIV/0!	#DIV/0!	#DIV/0!
13		>bta-miR-3064 MIMAT0036974	UUGCCACACUGCAACACCUUACA	35.762	35.682	0.06	35.72	5.64	0.0201	35.148	35.162	0.01	35.15	5.12	0.0287				1.4285	0.514502	0.00509
13		>bta-miR-2466-5p MIMAT0012054	CUGAGUCCGGUGGGGCAGUGUGU	27.255	27.424	0.12	27.34	-2.74	6.6946	28.973	28.949	0.02	28.96	-1.07	2.098				0.313383	-1.674	0.00276
13		>bta-miR-484 MIMAT0003535	UCAGGCUCAGUCCCCUCCCGAU	27.296	27.343	0.03	27.32	-2.76	6.7881	26.165	26.176	0.01	26.17	-3.86	14.5153				2.13835	1.0965	0.00044
13		>oar-miR-487b-5p MIMAT0019294	AGUGGUUAUCCCUGUCCUGUUC	33.24	33.236	0	33.24	3.16	0.1122	34.04	33.942	0.07	33.99	3.96	0.0642				0.572164	-0.8055	0.00421
13		>bta-miR-191 MIMAT0003819	CAACGGAAUCCCAAAAGCAGCUG	25.194	25.154	0.03	25.17	-4.91	30.0335	23.812	23.824	0.01	23.82	-6.21	74.1308				2.46827	1.3035	0.00024
13		18s		30.007	30.158	0.11	30.08	0	1	29.961	30.099	0.1	30.03	0	1				1	0	0.65883
14		>bta-miR-758 MIMAT0009370	UUUGUGACCUGGUCCACUAACC	32.388	32.25	0.1	32.32	2.26	0.2094	32.92	33.142	0.16	33.03	3.35	0.0979				0.46765	-1.0965	0.03208
14		>bta-miR-2465 MIMAT0012053	UGAGCCACAGUAGAGCCUUGGAU	36.406	36.623	0.15	36.51	6.45	0.0114	34.972	34.984	0.01	34.98	5.3	0.0254				2.22222	1.152	0.00496
14		>bta-miR-2479 MIMAT0012071	AGUUUGUAUUGUUUCUUUUG	37.823	37.899	0.05	37.86	7.8	0.0045	36.528	36.915	0.27	36.72	7.04	0.0076				1.68763	0.755	0.02867
14		>bta-miR-2899 MIMAT0013857	AGGCGGGCCGGGGUUGGA	23.142	23.16	0.01	23.15	-6.91	120.467	24.037	24.195	0.11	24.12	-5.56	47.2748				0.392428	-1.3495	0.00672
14		>bta-miR-2466-3p MIMAT0012055	GCAGCCCCUCCGUCUGACUCAG	33.353	33.422	0.05	33.39	3.32	0.0999	32.214	32.001	0.15	32.11	2.43	0.1858				1.86026	0.895501	0.00756
14		>bta-miR-665 MIMAT0009363	ACCAGUAGGCCGAGGCCCCU	30.539	30.481	0.04	30.51	0.45	0.7338	31.458	31.469	0.01	31.46	1.78	0.2903				0.395569	-1.338	0.00096
14		>bta-miR-133c MIMAT0029949	AUUUGGUUCCAUUUUACCAGC	36.003	35.899	0.07	35.95	5.89	0.0169	34.989	35.246	0.18	35.12	5.44	0.0231				1.36509	0.449	0.02656
14		18s		30.022	30.105	0.06	30.06	0	1	29.6	29.758	0.11	29.68	0	1				1	0	0.04987
15		>oar-miR-544-5p MIMAT0019298	UCUUGUUAAAAGGCAGAUUCU	32.127	32.332	0.14	32.23	2.3	0.2037	35.1	34.873	0.16	34.99	5.1	0.0292				0.143388	-2.802	0.00306
15		>bta-miR-2450d MIMAT0036977	CAUGGUCAGUAGAGGCGCAUGUG	32.989	33.041	0.04	33.01	3.08	0.1182	34.12	33.981	0.1	34.05	4.16	0.0559				0.472865	-1.0805	0.0051
15		>bta-miR-2356 MIMAT0011893	UCUUGUGAUGAGGGAGUCUGAGG	31.596	31.025	0.4	31.31	1.38	0.3852	30.579	30.704	0.09	30.64	0.75	0.5936				1.54114	0.624	0.14927
15		>bta-miR-875 MIMAT0009379	UAUACCUCAGUUUUAUCAGGUG	38.606	37.894	0.5	38.25	8.32	0.0031	37.499	37.491	0.01	37.5	7.61	0.0051				1.6358	0.709999	0.16803
15		>bta-miR-2486-3p MIMAT0012082	AAAUGAGGGGCAAAAUCUGUGUU	37.691	38.567	0.62	38.13	8.2	0.0034	36.901	36.13	0.55	36.52	6.63	0.0101				2.96596	1.5685	0.10968
15		>oar-miR-23b MIMAT0030049	AUCACAUUGCCAGGGAUU	22.426	22.4	0.02	22.41	-7.52	183.673	21.486	21.373	0.08	21.43	-8.46	352.017				1.91654	0.9385	0.00346
15		>bta-miR-149-5p MIMAT0024570	UCUGGCUCCGUGUCUUCACUCCC	31.971	31.978	0	31.97	2.04	0.2431	30.508	30.698	0.13	30.6	0.71	0.6096				2.50794	1.3265	0.00477
15		18s		29.925	29.943	0.01	29.93	0	1	29.889	29.889	0	29.89	0	1				1	0	0.03776
16		>oar-miR-152 MIMAT0030035	UCAGUGCAUGACAGAACUUGG	26.987	27.029	0.03	27.01	-2.99	7.9337	25.479	25.424	0.04	25.45	-4.35	20.4284				2.57487	1.3645	0.00049
16		>bta-miR-2299-3p MIMAT0011808	UCCGGGGAAUGGAUCCAGCGU	32.588	32.586	0	32.59	2.59	0.166	33.527	33.562	0.02	33.54	3.74	0.0748				0.450781	-1.1495	0.00033
16		>bta-miR-2448-3p MIMAT0012026	GUGGUUGAUUGGAUCCGUGGGU	34.484	34.374	0.08	34.43	4.43	0.0463	33.241	33.231	0.01	33.24	3.43	0.0927				2.00139	1.001	0.00214
16		>bta-miR-2284r MIMAT0012010	UUGGCCCAAAAGUUCGUUCGGAU	34.848	35.058	0.15	34.95	4.96	0.0322	33.635	33.921	0.2	33.78	3.97	0.0636				1.97657	0.983	0.02205
16		>oar-miR-432 MIMAT0001416	UCUUGGAGUAGGUCAUUGGGUGG	31.35	31.282	0.05	31.32	1.32	0.4005	29.954	30.024	0.05	29.99	0.18	0.8796				2.19619	1.135	0.00135
16		>bta-miR-100 MIMAT0009215	AACCCGUAGAUCCGAACUUGUG	27.042	27.024	0.01	27.03	-2.96	7.7974	24.514	24.516	0	24.52	-5.29	39.0974				5.01413	2.326	1e-05
16		>bta-miR-6522 MIMAT0025540	UCGGAAUUGUUUGUGUACCUGU	35.096	38.015	2.06	36.56	6.56	0.0106	33.447	33.631	0.13	33.54	3.73	0.0751				7.08369	2.8245	0.17523
16		18s		29.996	29.996	0	30	0	1	29.804	29.804	0	29.8	0	1				1	0	#DIV/0!
17		>bta-miR-2463 MIMAT0012050	CUGCAUGUGGUGGAAAUGUCUG	27.6145	27.8117	0.14	27.71	-4.88	29.388	26.8406	27.8641	0.72	27.35	-1.98	3.9373				0.133978	-2.89993	0.5604
17		>oar-miR-496-5p MIMAT0019319	GAGUCGGGUACUCGAAUGGA	35.5587	34.1955	0.96	34.88	2.29	0.2049	34.5553	35.9572	0.99	35.26	5.93	0.0164				0.0802254	-3.6398	0.73557
17		>bta-miR-4657 MIMAT0036970	AAUGUGGAAGUGGUCUGAGGCAU	28.2438	29.2618	0.72	28.75	-3.84	14.295	28.8101	28.9101	0.07	28.86	-0.47	1.3846				0.0968618	-3.36793	0.8533
17		>oar-miR-26a MIMAT0030051	UUCAAGUAAUCCAGGAUAGGCU	22.6644	24.2489	1.12	23.46	-9.13	561.688	21.2855	20.9755	0.22	21.13	-8.2	293.877				0.523204	-0.934554	0.10229
17		>bta-miR-423-3p MIMAT0003831	AAGCUCGGUCUGAGGCCCCUCAGU	22.3673	22.6002	0.16	22.48	-10.11	1102.47	20.7835	19.9803	0.57	20.38	-8.95	493.766				0.447872	-1.15884	0.03737
17		>bta-miR-2355-5p MIMAT0011891	CCCAGAUACAAUGGACAAUAUGC	35.307	34.7054	0.43	35.01	2.42	0.1874	34.7548	33.389	0.97	34.07	4.74	0.0374				0.199383	-2.32638	0.33713
17		>bta-miR-2329-3p MIMAT0011859	UCUGUGAUGUGAGCUGAUAAGU	36.9507	36.8302	0.09	36.89	4.3	0.0508	34.8045	33.3049	1.06	34.05	4.73	0.0378				0.744886	-0.424909	0.06371
17		18s		32.7079	32.4726	0.17	32.59	0	1	29.6811	28.9781	0.5	29.33	0	1				1	0	0.01268
18		>bta-miR-2882 MIMAT0013840	AGCCCGGGCCCCUCCCCUG	24.565	24.653	0.06	24.61	-6.05	66.0735	25.278	25.246	0.02	25.26	-4.96	31.028				0.469599	-1.0905	0.0051
18		>bta-miR-369-5p MIMAT0003801	AUCGACCGUGUUAUAUUCGC	31.588	31.697	0.08	31.64	0.99	0.5044	31.336	31.368	0.02	31.35	1.13	0.4555				0.903126	-0.147	0.03617
18		>bta-miR-2489 MIMAT0011825	AAAUGACAGGGGACAUGAGUUU	34.247	34.542	0.21	34.39	3.74	0.0749	34.594	34.66	0.05	34.63	4.41	0.0471				0.628507	-0.67	0.26384
18		>bta-miR-2441 MIMAT0012016	ACAGGACAGGACAGUGGGAG	33.481	33.739	0.18	33.61	2.95	0.129	32.084	31.982	0.07	32.03	1.82	0.2841				2.20304	1.1395	0.00765
18		>bta-miR-2321 MIMAT0011848	UGUCGGUUGGUUUUUGUUUG	33.447	33.361	0.06	33.4	2.75	0.1488	34.325	34.368	0.03	34.35	4.13	0.0572				0.384219	-1.38	0.00259
18		>bta-miR-2453 MIMAT0012034	UCCUCAGGGCAGGAAGUGCGCAG	35.704	35.704	0	35.7	5.05	0.0302	33.494	33.392	0.07	33.44	3.23	0.1069				3.53939	1.8235	0.00051
18		>bta-miR-2285ab MIMAT0030436	AAAACCUGAAUGAACUUCUUGG	33.99	34.058	0.05	34.02	3.37	0.0968	33.156	33.199	0.03	33.18	2.96	0.1285				1.32777	0.409	0.00225
18		18s		30.96	30.35	0.43	30.65	0	1	30.282	30.153	0.09	30.22	0	1				1	0	0.29561
19		>bta-miR-30c MIMAT0003850	UGUAAACAUCCUACACUCUCAGC	21.318	21.351	0.02	21.33	-6.67	101.547	20.97	20.989	0.01	20.98	-6.58	95.9027				0.94442	-0.0824995	0.00286
19		>oar-miR-409-5p MIMAT0019327	AGGUUACCCGAGCAACUUUGCAU	29.98	30.001	0.01	29.99	1.99	0.2517	30.008	30.016	0.01	30.01	2.45	0.1831				0.72749	-0.459001	0.1958
19		>bta-miR-219 MIMAT0030444	AGAGUUGAGUCUGGACGUCCCG	31.762	31.467	0.21	31.61	3.61	0.0817	30.371	30.575	0.14	30.47	2.91	0.133				1.62901	0.703999	0.0238
19		>oar-let-7i MIMAT0030026	UGAGGUAGUAGUUUGUGCUGUU	21.026	20.897	0.09	20.96	-7.04	131.507	20.127	20.024	0.07	20.08	-7.49	179.458				1.36462	0.448499	0.00857
19		>bta-miR-125a MIMAT0003538	UCCCUGAGACCCUUUAACCUGUG	24.297	24.313	0.01	24.31	-3.7	12.9556	21.843	21.747	0.07	21.8	-5.77	54.493				4.20615	2.0725	0.00038
19		>bta-miR-363 MIMAT0003855	AUUGCACGGUAUCCAUCUGCG	28.086	28.055	0.02	28.07	0.07	0.9526	27.577	27.593	0.01	27.59	0.02	0.9849				1.03383	0.0480003	0.00129
19		>bta-miR-2285q MIMAT0025574	AAGGACCUGAAUGAACUUUCUGG	31.899	31.593	0.22	31.75	3.75	0.0746	31.198	31.285	0.06	31.24	3.68	0.0781				1.04754	0.0670004	0.08668
19		18s		27.991	28.01	0.01	28	0	1	27.539	27.587	0.03	27.56	0	1				1	0	0.00346
20		>oar-miR-655-3p MIMAT0019301	AUAAUACAUGGUUAACCUCUCU	29.987	29.577	0.29	29.78	1.71	0.3065	29.555	29.893	0.24	29.72	2.16	0.2242				0.731535	-0.451001	0.84744
20		>bta-let-7e MIMAT0004333	UGAGGUAGGAGGUUGUAUAGU	20.267	20.055	0.15	20.16	-7.91	241.353	18.973	18.983	0.01	18.98	-8.59	385.076				1.59549	0.674	0.00795
20		>oar-miR-539-5p MIMAT0019296	AGAAAUUAUCCUUGGUGUGUUC	33.881	33.75	0.09	33.82	5.74	0.0187	35.972	36.438	0.33	36.2	8.64	0.0025				0.134111	-2.8985	0.0101
20		>bta-miR-6121-3p MIMAT0024593	CCGGAUGAUGGACACUGAGG	29.308	29.376	0.05	29.34	1.27	0.4158	32.569	32.59	0.01	32.58	5.01	0.031				0.0745059	-3.7465	0.00012
20		>bta-miR-2889 MIMAT0013847	GUCCCCGGGGCUCCCGCCGGC	25.514	25.503	0.01	25.51	-2.57	5.9278	27.184	27.182	0	27.18	-0.38	1.305				0.220141	-2.1835	1e-05
20		>bta-miR-2340 MIMAT0011875	GGACUUCCCUGGUGGUCUUGUG	23.196	23.095	0.07	23.15	-4.93	30.495	21.292	21.274	0.01	21.28	-6.28	77.9242				2.55531	1.3535	0.00076
20		>bta-miR-2370-5p MIMAT0011914	UGGGAAAAUGAAAGUUGGUUAU	Undetermined	Undetermined	#DIV/0!	#DIV/0!	#DIV/0!	#DIV/0!	Undetermined	Undetermined	#DIV/0!	#DIV/0!	#DIV/0!	#DIV/0!				#DIV/0!	#DIV/0!	#DIV/0!
20		18s		28.006	28.146	0.1	28.08	0	1	27.557	27.577	0.01	27.57	0	1				1	0	0.01876
21		>oar-miR-543-5p MIMAT0019271	ACCUGUGGUGCUUAAGGAG	32.8	32.979	0.13	32.89	4.57	0.0422	31.464	31.791	0.23	31.63	3.63	0.0809				1.91853	0.939998	0.02113
21		>bta-miR-2395 MIMAT0011948	CUGUUGGCAGCUCUCUCAGAC	29.436	29.552	0.08	29.49	1.17	0.4437	30.495	30.535	0.03	30.52	2.52	0.1749				0.3942	-1.343	0.00359
21		>oar-miR-411b-3p MIMAT0019256	UAUGUCACAUGGUCCACUAAU	31.975	32.03	0.04	32	3.68	0.078	32.448	32.447	0	32.45	4.45	0.0458				0.587637	-0.767002	0.0038
21		>bta-miR-1 MIMAT0009214	UGGAAUGUAAAGAAGUAUGUAU	26.683	26.688	0	26.69	-1.64	3.108	25.16	25.211	0.04	25.19	-2.81	7.0323				2.26263	1.178	0.00029
21		>oar-miR-218a MIMAT0030045	UUGUGCUUGAUCUAACCAUGU	27.304	27.292	0.01	27.3	-1.02	2.0328	24.644	24.585	0.04	24.61	-3.39	10.4469				5.13904	2.3615	0.00013
21		>bta-miR-3602 MIMAT0016937	GUGUUGGGAUCACCGCGGUAA	31.873	31.988	0.08	31.93	3.61	0.082	32.84	32.843	0	32.84	4.84	0.0349				0.425432	-1.233	0.00396
21		>oar-miR-125b MIMAT0014971	UCCCUGAGACCCUAACUUGUG	21.554	21.611	0.04	21.58	-6.74	106.817	18.752	18.895	0.1	18.82	-9.18	578.43				5.41514	2.437	0.00078
21		18s		28.318	28.325	0	28.32	0	1	27.967	28.032	0.05	28	0	1				1	0	0.01015
22		>oar-miR-133 MIMAT0014972	UUGGUCCCCUUCAACCAGCUGU	27.933	27.947	0.01	27.94	-0.31	1.2419	27.173	27.241	0.05	27.21	-0.6	1.5199				1.22391	0.291501	0.00224
22		>oar-miR-543-3p MIMAT0019272	AAACAUUCGCGGUGCACUUCUUU	25.413	25.421	0.01	25.42	-2.84	7.1379	28.659	28.842	0.13	28.75	0.94	0.5214				0.0730486	-3.775	0.00075
22		>oar-miR-411a-5p MIMAT0019249	AUAGUAGACCGUAUAGCGUACG	26.803	26.62	0.13	26.71	-1.54	2.91	26.09	26.272	0.13	26.18	-1.63	3.0951				1.06363	0.0890007	0.05439
22		>bta-miR-122 MIMAT0003849	UGGAGUGUGACAAUGGUGUUUG	30.928	30.952	0.02	30.94	2.69	0.1552	30.018	30.375	0.25	30.2	2.39	0.1914				1.23285	0.302	0.05331
22		>bta-miR-2456 MIMAT0012041	ACGCACUGUCCUGGGAAGUGG	33.48	33.138	0.24	33.31	5.06	0.03	31.825	32.02	0.14	31.92	4.11	0.0579				1.92519	0.945	0.01957
22		>oar-miR-381-3p MIMAT0019293	AUAUACAAGGGCAAGCUCUCU	31.674	31.765	0.06	31.72	3.47	0.0904	32.911	33.001	0.06	32.96	5.14	0.0283				0.312516	-1.678	0.00267
22		>bta-miR-1282 MIMAT0009954	UCGUUUGCCUUUUUCUGCUU	32.173	32.508	0.24	32.34	4.09	0.0588	33.513	33.896	0.27	33.7	5.89	0.0168				0.286082	-1.8055	0.03307
22		18s		28.247	28.258	0.01	28.25	0	1	27.733	27.889	0.11	27.81	0	1				1	0	0.02996
23		>bta-miR-302b MIMAT0009280	UAAGUGCUUCCAUGUUUUAGUAG	34.145	33.908	0.17	34.03	5.43	0.0232	35.359	35.265	0.07	35.31	7.08	0.0074				0.319082	-1.648	0.00969
23		>oar-miR-412-3p MIMAT0019329	UGGUCGACCAGUUGGAAAGUAAU	29.933	29.12	0.57	29.53	0.93	0.5241	30.026	30.313	0.2	30.17	1.94	0.2611				0.498098	-1.0055	0.27432
23		>bta-miR-2484 MIMAT0012077	GAGCUAUGAUGACUUUGAUUGCAU	33.176	33.057	0.08	33.12	4.52	0.0435	33.051	32.993	0.04	33.02	4.79	0.0361				0.83047	-0.268001	0.28955
23		>bta-miR-2285m MIMAT0025533	AAAACGCAAAUGAACUUUUUGG	32.553	32.354	0.14	32.45	3.86	0.0689	34.035	34.517	0.34	34.28	6.04	0.0152				0.219912	-2.185	0.01986
23		>bta-miR-2462 MIMAT0012049	AAAGGAUUGGCUGAAUUGUAG	31.867	31.944	0.05	31.91	3.31	0.1008	32.567	32.98	0.29	32.77	4.54	0.0429				0.42617	-1.2305	0.05388
23		>bta-miR-3604 MIMAT0016939	UAACCAAUGUGCAGACUACUGU	34.871	34.988	0.08	34.93	6.33	0.0124	34.964	34.768	0.14	34.87	6.63	0.0101				0.812814	-0.299003	0.63391
23		>bta-miR-2373-5p MIMAT0011918	CUUCCCCGGUCAGGGCUCGGC	19.971	19.936	0.02	19.95	-8.64	399.209	23.376	23.481	0.07	23.43	-4.8	27.9253				0.0699516	-3.8375	0.00025
23		18s		28.572	28.617	0.03	28.59	0	1	28.187	28.277	0.06	28.23	0	1				1	0	0.01872
24		>bta-miR-2458 MIMAT0012043	AUUGGAAAGAGUAAGCUGGUGU	37.123	36.311	0.57	36.72	8.23	0.0033	35.642	35.362	0.2	35.5	7.16	0.007				2.09217	1.065	0.10553
24		>bta-miR-377 MIMAT0009304	AUCACACAAAGGCAACUUUUGU	30.917	30.862	0.04	30.89	2.4	0.1894	31.945	31.937	0.01	31.94	3.6	0.0824				0.434823	-1.2015	0.0007
24		>bta-miR-653 MIMAT0009358	GUGUUGAAACAAUCUCUGUUG	36.337	35.988	0.25	36.16	7.67	0.0049	33.867	33.363	0.36	33.61	5.28	0.0258				5.26889	2.3975	0.01417
24		>bta-miR-133a MIMAT0009225	UUUGGUCCCCUUCAACCAGCUG	26.627	26.601	0.02	26.61	-1.88	3.668	26.417	26.37	0.03	26.39	-1.95	3.8517				1.05008	0.0704994	0.01451
24		>oar-miR-30d MIMAT0030059	UGUAAACAUCCCCGACUGG	24.088	23.99	0.07	24.04	-4.45	21.8567	23.585	23.315	0.19	23.45	-4.89	29.6303				1.35566	0.438999	0.05463
24		>bta-miR-2454-3p MIMAT0012036	UCUCCUCUGGCCGCUCUCCU	27.953	27.987	0.02	27.97	-0.52	1.433	28.268	28.38	0.08	28.32	-0.02	1.0105				0.705149	-0.504001	0.02626
24		>bta-miR-2397-3p MIMAT0011952	CAGAGCAGUGGCAAGAACGCAU	32.101	32.084	0.01	32.09	3.6	0.0823	31.848	31.522	0.23	31.68	3.35	0.0983				1.19541	0.257501	0.1299
24		18s		28.45	28.528	0.06	28.49	0	1	28.344	28.334	0.01	28.34	0	1				1	0	0.06235
25		>oar-miR-3959-5p MIMAT0019302	GGUUGAUCAGAGAACAUACAUU	29.579	29.62	0.03	29.6	-0.42	1.3338	29.992	30.071	0.06	30.03	0	1.0017				0.751061	-0.412998	0.01045
25		>bta-miR-2284k MIMAT0011907	GAAAAGUUCGGUCGGGUUUUU	31.261	31.206	0.04	31.23	1.22	0.4297	31.895	31.674	0.16	31.78	1.75	0.2972				0.691596	-0.532	0.04015
25		>bta-miR-2285v MIMAT0025579	AGAACCGGAACGAACUUUUUG	37.127	37.011	0.08	37.07	7.05	0.0075	37.116	37.563	0.32	37.34	7.31	0.0063				0.840023	-0.251499	0.36207
25		>bta-miR-2330-3p MIMAT0011862	ACUCCUUACCCCUGGCCGUC	33.885	33.614	0.19	33.75	3.73	0.0751	34.784	34.12	0.47	34.45	4.42	0.0468				0.622653	-0.6835	0.18919
25		>oar-miR-487a-5p MIMAT0019304	GUGGCUAUCCCUGCUGUGUUCG	33.477	33.391	0.06	33.43	3.42	0.0935	33.126	33.231	0.07	33.18	3.14	0.1131				1.20958	0.274502	0.06386
25		>bta-miR-2427 MIMAT0011997	AGGUCAUUUCAAAGAGGGCUG	31.64	31.675	0.02	31.66	1.64	0.3203	29.694	29.638	0.04	29.67	-0.37	1.2906				4.02922	2.0105	0.00027
25		>bta-miR-2461-3p MIMAT0012048	UCAGACUGAGAGCAGUGUGCCU	35.825	35.704	0.09	35.76	5.75	0.0186	35.083	34.892	0.14	34.99	4.95	0.0323				1.73628	0.796001	0.02052
25		18s		30.063	29.967	0.07	30.01	0	1	29.986	30.082	0.07	30.03	0	1				1	0	0.80584
26		>bta-miR-2425-3p MIMAT0011995	UUCGUAGACCCUGCCCUCCU	34.339	34.423	0.06	34.38	4.22	0.0538	34.537	34.546	0.01	34.54	4.24	0.053				0.984185	-0.0229988	0.06281
26		>bta-miR-764 MIMAT0009948	GGUGCUCACUCGUCCUUCU	36.931	36.972	0.03	36.95	6.79	0.0091	37.021	36.88	0.1	36.95	6.65	0.01				1.10076	0.1385	0.99037
26		>bta-miR-323 MIMAT0009284	GCACAUUACACGGUCGACCUCU	32.29	32.29	0	32.29	2.12	0.2294	34.819	34.493	0.23	34.66	4.35	0.049				0.213381	-2.2285	0.00471
26		>bta-miR-424-3p MIMAT0015304	CAAAACGUGAGGCGCUGCUAU	31.162	31.162	0	31.16	1	0.5014	30.441	30.334	0.08	30.39	0.08	0.9434				1.88165	0.912002	0.00474
26		>bta-miR-145 MIMAT0003542	GUCCAGUUUUCCCAGGAAUCCCU	21.802	21.775	0.02	21.79	-8.38	332.567	21.704	21.68	0.02	21.69	-8.61	391.129				1.17609	0.234	0.0333
26		>bta-miR-26b MIMAT0003531	UUCAAGUAAUUCAGGAUAGGUU	24.516	24.624	0.08	24.57	-5.6	48.3686	23.341	23.094	0.17	23.22	-7.09	135.862				2.80889	1.49	0.00979
26		>bta-miR-2285p MIMAT0025532	AAAAACUUGAGUGAACUUUUGG	36.626	36.149	0.34	36.39	6.22	0.0134	37.268	36.321	0.67	36.79	6.49	0.0111				0.829607	-0.269501	0.52293
26		18s		30.116	30.216	0.07	30.17	0	1	30.192	30.415	0.16	30.3	0	1				1	0	0.37738
27		>bta-miR-101 MIMAT0003520	UACAGUACUGUGAUAACUGAA	24.794	24.656	0.1	24.73	-4.86	29.1111	23.577	23.564	0.01	23.57	-6.19	72.9078				2.50446	1.3245	0.00358
27		>bta-miR-2478 MIMAT0012070	GUAUCCCACUUCUGACACCA	Undetermined	20.87	#DIV/0!	20.87	-8.72	421.24	22.5	22.496	0	22.5	-7.26	153.33				0.363998	-1.458	#DIV/0!
27		>bta-miR-30e-5p MIMAT0003799	AAAACCCAAACAAACUUUUUU	35.253	35.324	0.05	35.29	5.7	0.0192	33.145	32.982	0.12	33.06	3.3	0.1012				5.25977	2.395	0.00159
27		>bta-miR-2904 MIMAT0013862	GGGAGCCUCGGUUGGCCUC	32.665	Undetermined	#DIV/0!	32.67	3.08	0.1185	33.444	33.11	0.24	33.28	3.52	0.0873				0.736114	-0.441999	#DIV/0!
27		>bta-miR-153 MIMAT0009239	UUGCAUAGUCACAAAAGUGAUC	33.635	33.28	0.25	33.46	3.87	0.0684	33.472	33.337	0.1	33.4	3.65	0.0799				1.16716	0.222998	0.80639
27		>bta-miR-660 MIMAT0004344	UACCCAUUGCAUAUCGGAGCUG	28.754	28.841	0.06	28.8	-0.79	1.7303	27.997	27.947	0.04	27.97	-1.79	3.4498				1.99377	0.9955	0.00367
27		>oar-miR-411b-5p MIMAT0019255	UGGUCGACCAUAAAACGUACGU	Undetermined	33.188	#DIV/0!	33.19	3.6	0.0825	33.753	34.138	0.27	33.95	4.19	0.0549				0.665495	-0.5875	#DIV/0!
27		18s		29.595	29.582	0.01	29.59	0	1	29.018	30.499	1.05	29.76	0	1				1	0	0.83977
28		>bta-miR-196b MIMAT0009256	UAGGUAGUUUCCUGUUGUUGGGA	29.614	29.405	0.15	29.51	-0.46	1.3717	27.711	27.872	0.11	27.79	-2.09	4.2678				3.11126	1.6375	0.00584
28		>bta-miR-29b MIMAT0003828	UAGCACCAUUUGAAAUCAGUGUU	23.68	23.638	0.03	23.66	-6.31	79.149	23.751	23.707	0.03	23.73	-6.16	71.3084				0.900939	-0.150499	0.14798
28		>bta-miR-190a MIMAT0009251	UGAUAUGUUUGAUAUAUUAGGU	26.21	26.227	0.01	26.22	-3.75	13.4264	27.868	27.825	0.03	27.85	-2.04	4.1082				0.305978	-1.7085	0.0002
28		>oar-miR-539-3p MIMAT0019297	AAUCAUACAAGGACAAUUUCUUU	39.212	38.487	0.51	38.85	8.88	0.0021	39.96	38.503	1.03	39.23	9.35	0.0015				0.725729	-0.462498	0.68495
28		>bta-miR-2337 MIMAT0011870	GUGGUUUCUUAUUCCUUUUU	Undetermined	39.512	#DIV/0!	39.51	9.55	0.0013	38.963	37.757	0.85	38.36	8.48	0.0028				2.10162	1.0715	#DIV/0!
28		>oar-miR-150 MIMAT0030034	UCUCCCAACCCUUGUACCAGUG	Undetermined	Undetermined	#DIV/0!	#DIV/0!	#DIV/0!	#DIV/0!	Undetermined	Undetermined	#DIV/0!	#DIV/0!	#DIV/0!	#DIV/0!				#DIV/0!	#DIV/0!	#DIV/0!
28		>bta-miR-2284f MIMAT0011905	AAAGUUCGUUCGGAUUUUUC	26.973	26.746	0.16	26.86	-3.11	8.6099	23.805	23.886	0.06	23.85	-6.04	65.7765				7.63962	2.9335	0.00159
28		18s		29.916	30.015	0.07	29.97	0	1	29.855	29.915	0.04	29.89	0	1				1	0	0.29883
29		>bta-miR-326 MIMAT0009286	CCUCUGGGCCCUUCCUCCAG	Undetermined	Undetermined	#DIV/0!	#DIV/0!	#DIV/0!	#DIV/0!	Undetermined	Undetermined	#DIV/0!	#DIV/0!	#DIV/0!	#DIV/0!				#DIV/0!	#DIV/0!	#DIV/0!
29		>bta-miR-494 MIMAT0009334	UGAAACAUACACGGGAAACCUC	28.866	28.932	0.05	28.9	-1.6	3.0346	30.163	30.179	0.01	30.17	-0.31	1.2397				0.408525	-1.2915	0.00071
29		>bta-miR-452 MIMAT0009324	UGUUUGCAGAGGAAACUGAGAC	30.142	30.083	0.04	30.11	-0.39	1.3086	31.116	31.218	0.07	31.17	0.69	0.6216				0.475	-1.074	0.00311
29		>oar-miR-431 MIMAT0001414	UGUCUUGCAGGCCGUCAUGCAGG	31.736	31.766	0.02	31.75	1.25	0.4203	32.294	32.265	0.02	32.28	1.8	0.2875				0.683968	-0.547999	0.00155
29		>bta-miR-935 MIMAT0009385	CCAGUUACCGCUUCCGCUACCGC	31.779	31.255	0.37	31.52	1.02	0.4943	31.459	31.129	0.23	31.29	0.81	0.5692				1.15149	0.203499	0.54619
29		>bta-miR-376c MIMAT0009947	GUGGAUAUUCCUUCUAUGUUUA	Undetermined	28.94	#DIV/0!	28.94	-1.56	2.9496	31.527	31.817	0.21	31.67	1.19	0.438				0.148496	-2.7515	#DIV/0!
29		>oar-miR-376a-5p MIMAT0019286	UAGAUUCUCCUUCUAUGAGUAC	33.299	32.988	0.22	33.14	2.64	0.1601	32.743	32.995	0.18	32.87	2.39	0.191				1.19334	0.254999	0.30381
29		18s		30.478	30.523	0.03	30.5	0	1	30.487	30.475	0.01	30.48	0	1				1	0	0.49047
30		>bta-miR-2285ad MIMAT0030446	AAAACCCAAAUGAACUUUUUGG	33.326	33.334	0.01	33.33	2.92	0.1321	35.463	35.63	0.12	35.55	4.74	0.0374				0.283123	-1.8205	0.00142
30		>oar-miR-1197-5p MIMAT0019257	CCCUUCCUGGUAUUUGAAGACG	39.205	39.521	0.22	39.36	8.95	0.002	39.226	38.743	0.34	38.98	8.18	0.0035				1.7106	0.7745	0.32001
30		>bta-miR-378c MIMAT0025551	ACUGGACUUGGAGUCAGAAGU	27.46	27.362	0.07	27.41	-3	7.9945	30.025	30.095	0.05	30.06	-0.75	1.6771				0.209787	-2.253	0.00052
30		>bta-miR-1835 MIMAT0009961	UGCACCCUGAGAGCUGGGGCUG	23.882	23.911	0.02	23.9	-6.51	91.3606	23.976	23.987	0.01	23.98	-6.82	113.339				1.24057	0.311	0.03171
30		>bta-miR-31 MIMAT0003548	AGGCAAGAUGCUGGCAUAGCU	29.502	29.392	0.08	29.45	-0.96	1.9494	28.533	28.989	0.32	28.76	-2.04	4.1267				2.11697	1.082	0.09971
30		>bta-miR-2440 MIMAT0012015	UGCAGUGAUGAGACCCUGGA	27.938	27.923	0.01	27.93	-2.48	5.577	28.515	28.577	0.04	28.55	-2.26	4.7899				0.858863	-0.2195	0.00267
30		>bta-miR-2285a MIMAT0011797	AAAAACUGAAUGAAAUUCUUGG	34.732	34.596	0.1	34.66	4.25	0.0524	34.604	35.275	0.47	34.94	4.13	0.057				1.08711	0.120499	0.5054
30		18s		30.352	30.468	0.08	30.41	0	1	31.055	30.557	0.35	30.81	0	1				1	0	0.26152
31		>bta-miR-2444 MIMAT0012021	UUUGUGUUGUUUUUUGUUUU	33.964	34.141	0.13	34.05	6.63	0.0101	33.984	34.221	0.17	34.1	6.82	0.0089				0.875694	-0.191502	0.7675
31		>bta-miR-2284i MIMAT0011792	GAGAAGUUCGUUCUGGUGUUU	35.273	35.308	0.02	35.29	7.86	0.0043	37.429	37.305	0.09	37.37	10.08	0.0009				0.214939	-2.218	0.00096
31		>bta-miR-375 MIMAT0009303	UUUUGUUCGUUCGGCUCGCGUGA	23.546	23.268	0.2	23.41	-4.02	16.2234	26.605	26.628	0.02	26.62	-0.67	1.59				0.098005	-3.351	0.00188
31		>bta-miR-301a MIMAT0009276	CAGUGCAAUAGUAUUGUCAAAGCAU	28.608	28.676	0.05	28.64	1.22	0.4308	30.217	30.128	0.06	30.17	2.89	0.1352				0.313818	-1.672	0.00134
31		>bta-miR-2488 MIMAT0012084	AUGUUGAUCCUAUUCCCUCU	Undetermined	38.955	#DIV/0!	38.96	11.53	0.0003	Undetermined	Undetermined	#DIV/0!	#DIV/0!	#DIV/0!	#DIV/0!				#DIV/0!	#DIV/0!	#DIV/0!
31		>bta-miR-187 MIMAT0009248	UCGUGUCUUGUGUUGCAGCCGG	32.136	31.988	0.1	32.06	4.64	0.0402	30.255	29.949	0.22	30.1	2.82	0.142				3.52715	1.8185	0.00744
31		>bta-miR-143 MIMAT0009233	UGAGAUGAAGCACUGUAGCUCG	20.612	20.578	0.02	20.59	-6.83	113.93	21.427	21.491	0.05	21.46	-5.83	56.7481				0.498097	-1.0055	0.00175
31		18s		27.499	27.355	0.1	27.43	0	1	27.233	27.338	0.07	27.29	0	1				1	0	0.25322
32		>bta-miR-2355-3p MIMAT0011892	AUUGUCCUUGCUGUUUGGAGAU	32.094	32.389	0.21	32.24	4.87	0.0341	31.122	31.169	0.03	31.15	3.86	0.069				2.0216	1.0155	0.01807
32		>oar-miR-409-3p MIMAT0019328	CGAAUGUUGCUCGGUGAACCCCU	28.503	28.447	0.04	28.48	1.11	0.4646	28.871	28.639	0.16	28.76	1.47	0.3619				0.778895	-0.360499	0.14354
32		>bta-miR-2382-5p MIMAT0011930	AGGGGAGUGCCUGGGAAGCUGU	20.639	20.479	0.11	20.56	-6.81	112.206	24.988	25.432	0.31	25.21	-2.08	4.2237				0.0376423	-4.7315	0.00256
32		>oar-miR-29a MIMAT0014967	UAGCACCAUCUGAAAUCGGUU	22.175	22.216	0.03	22.2	-5.17	36.0893	20.398	20.332	0.05	20.37	-6.92	121.389				3.36358	1.75	0.00045
32		>bta-miR-2433 MIMAT0012005	UGGGGGCGCUGCAGACACGGAUG	31.347	31.223	0.09	31.28	3.92	0.0662	30.762	30.781	0.01	30.77	3.48	0.0894				1.35004	0.433001	0.01459
32		>oar-miR-494-5p MIMAT0019267	AGGUUAUCCGUGUUGUCUUCUCU	36.989	37.119	0.09	37.05	9.68	0.0012	Undetermined	38.602	#DIV/0!	38.6	11.31	0.0004				0.323424	-1.6285	#DIV/0!
32		>bta-miR-543 MIMAT0009344	AAACAUUCGCGGUGCACUUCUU	30.15	30.086	0.05	30.12	2.75	0.1488	30.54	30.529	0.01	30.53	3.25	0.1054				0.708579	-0.497	0.00602
32		18s		27.335	27.403	0.05	27.37	0	1	27.296	27.281	0.01	27.29	0	1				1	0	0.14693
33		>bta-miR-367 MIMAT0009299	GAAUUGCACUUUAGCAAUGGUGA	35.858	35.412	0.32	35.64	8.36	0.003	35.124	34.96	0.12	35.04	7.85	0.0043				1.41863	0.5045	0.12997
33		>bta-miR-6119-5p MIMAT0024588	AGAGGUAAAAAAUUGAUUUGACU	27.226	27.245	0.01	27.24	-0.04	1.0285	27.402	27.376	0.02	27.39	0.2	0.8696				0.845573	-0.242	0.01083
33		>oar-miR-199a-3p MIMAT0030040	ACAGUAGUCUGCACAUUGGUU	24.658	24.827	0.12	24.74	-2.53	5.7897	21.481	21.521	0.03	21.5	-5.69	51.5				8.89503	3.153	0.00072
33		>bta-miR-2387 MIMAT0011939	UGGAAGGCCUGGCUUUGCAGCG	32.389	32.549	0.11	32.47	5.19	0.0273	31.141	31.099	0.03	31.12	3.93	0.0655				2.39579	1.2605	0.00374
33		>bta-miR-1185 MIMAT0009973	AGAGGAUACCCUUUGUAUGUU	29.095	29.029	0.05	29.06	1.79	0.29	28.842	28.453	0.28	28.65	1.46	0.3635				1.25353	0.326	0.17042
33		>oar-miR-299-3p MIMAT0019252	UAUGUGGGACGGUAAACCACAA	Undetermined	29.639	#DIV/0!	29.64	2.36	0.1944	32.248	32.293	0.03	32.27	5.08	0.0295				0.151774	-2.72	#DIV/0!
33		>bta-miR-7863 MIMAT0030445	AUGGACUGUCACCUGAGGAGC	33.127	32.908	0.15	33.02	5.74	0.0187	32.199	32.176	0.02	32.19	5	0.0313				1.67191	0.7415	0.01715
33		18s		27.252	27.3	0.03	27.28	0	1	27.063	27.312	0.18	27.19	0	1				1	0	0.55742
34		>oar-miR-495-5p MIMAT0019273	AGAAGUCGCCCAUGUUCUUUUCG	32.175	32.322	0.1	32.25	-1.19	2.2752	32.443	32.214	0.16	32.33	-0.5	1.4157				0.622222	-0.6845	0.61609
34		>bta-miR-2477 MIMAT0012069	GUGGAAUGAUGAUAAGUCUGACG	30.802	30.973	0.12	30.89	-2.55	5.8442	31.495	31.846	0.25	31.67	-1.16	2.2338				0.382227	-1.3875	0.05691
34		>bta-miR-184 MIMAT0009246	UGGACGGAGAACUGAUAAGGGU	36.067	35.875	0.14	35.97	2.54	0.1724	33.244	32.878	0.26	33.06	0.23	0.852				4.9434	2.3055	0.00501
34		>bta-miR-190b MIMAT0009252	UGAUAUGUUUGAUAUUGGGUU	26.366	26.373	0	26.37	-7.07	133.899	28.28	28.122	0.11	28.2	-4.63	24.7439				0.184795	-2.436	0.00186
34		>bta-miR-3432a MIMAT0017396	UGCGGGAUCUUUAGUUGUGGUG	27.7	27.605	0.07	27.65	-5.78	55.0244	26.001	25.955	0.03	25.98	-6.85	115.52				2.09944	1.07	0.00099
34		>bta-miR-502b MIMAT0009339	AAUCCACCUGGGCAAGGAUUC	25.261	25.227	0.02	25.24	-8.19	292.137	Undetermined	Undetermined	#DIV/0!	#DIV/0!	#DIV/0!	#DIV/0!				#DIV/0!	#DIV/0!	#DIV/0!
34		>bta-miR-2406 MIMAT0011964	AAGGGAAGAAGGAAGCUGGAUU	33.438	33.249	0.13	33.34	-0.09	1.0651	32.033	31.943	0.06	31.99	-0.84	1.7925				1.68296	0.751001	0.00591
34		18s		33.377	33.492	0.08	33.43	0	1	32.844	32.816	0.02	32.83	0	1				1	0	0.00945
35		>bta-miR-760-3p MIMAT0022951	CGGCUCUGGGUCUGUGGGGA	29.448	29.52	0.05	29.48	1.38	0.3832	29.819	29.855	0.03	29.84	1.71	0.3063				0.799406	-0.323	0.01275
35		>bta-miR-129-5p MIMAT0009221	CUUUUUGCGGUCUGGGCUUGCU	33.267	33.942	0.48	33.6	5.5	0.022	32.956	32.513	0.31	32.73	4.6	0.0411				1.86606	0.899999	0.16394
35		>bta-miR-4680 MIMAT0036979	AGAACUCUUGCAGUCUUAGAUGU	34.976	35.13	0.11	35.05	6.95	0.0081	32.124	31.972	0.11	32.05	3.92	0.0662				8.19646	3.035	0.00129
35		>bta-miR-2467-3p MIMAT0012057	GAGGGCAGUGAGGCUCAGGGCUG	31.484	29.242	1.59	30.36	2.26	0.2083	30.825	31.147	0.23	30.99	2.86	0.1381				0.662963	-0.593	0.63747
35		>bta-miR-1284 MIMAT0009955	UCUGCACAGACCCUGGCUUUUC	28.11	Undetermined	#DIV/0!	28.11	0.01	0.9931	Undetermined	Undetermined	#DIV/0!	#DIV/0!	#DIV/0!	#DIV/0!				#DIV/0!	#DIV/0!	#DIV/0!
35		>oar-miR-541-5p MIMAT0019323	AAAGGAUUCUGCUGUCGGUCCCACU	32.488	32.29	0.14	32.39	4.29	0.0512	32.319	32.074	0.17	32.2	4.07	0.0597				1.16675	0.222499	0.34612
35		>bta-miR-584 MIMAT0009352	UGGUUUGCCUGGGACUGAG	30.861	Undetermined	#DIV/0!	30.86	2.76	0.1475	30.825	30.688	0.1	30.76	2.63	0.1619				1.09771	0.1345	#DIV/0!
35		18s		28.089	28.111	0.02	28.1	0	1	28.088	28.172	0.06	28.13	0	1				1	0	0.56101
36		>bta-miR-486 MIMAT0009329	UCCUGUACUGAGCUGCCCCGAG	27.021	26.984	0.03	27	-0.85	1.8013	26.075	26.171	0.07	26.12	-1.58	2.9959				1.66324	0.733999	0.0034
36		>bta-miR-2315 MIMAT0011835	AGCAGAAUUUUUGGAUACUGG	33.715	33.626	0.06	33.67	5.82	0.0177	32.731	31.974	0.54	32.35	4.65	0.0399				2.25402	1.1725	0.0744
36		>bta-miR-2480 MIMAT0012072	AUUGUAUUGUUUCUUAUGAC	31.992	32.074	0.06	32.03	4.18	0.0551	34.556	34.547	0.01	34.55	6.85	0.0087				0.157782	-2.664	0.00027
36		>bta-miR-6120-3p MIMAT0024591	UAUGUUGGACAACGUGGAUAGC	33.866	33.881	0.01	33.87	6.02	0.0154	32.25	32.406	0.11	32.33	4.62	0.0406				2.63902	1.4	0.00256
36		>bta-miR-2285n MIMAT0025531	AAAAACCCGAAUGAACUUUUGG	32.42	32.263	0.11	32.34	4.49	0.0445	30.996	31.013	0.01	31	3.3	0.1016				2.2839	1.1915	0.00347
36		>bta-miR-2374 MIMAT0011920	UUGGGGCUGGGGAGAGGCGGG	27.345	27.494	0.11	27.42	-0.43	1.3491	27.608	27.526	0.06	27.57	-0.14	1.1011				0.816203	-0.293	0.22496
36		>oar-miR-200c MIMAT0030044	UAAUACUGCCGGGUAAUGAUGG	21.837	21.918	0.06	21.88	-5.97	62.857	21.97	21.997	0.02	21.98	-5.72	52.8013				0.840022	-0.2515	0.13106
36		18s		27.805	27.898	0.07	27.85	0	1	27.698	27.714	0.01	27.71	0	1				1	0	0.09103
37		>oar-miR-3955-3p MIMAT0019246	UGGGAUUUUAGUCCAUCAUAG	27.26	27.128	0.09	27.19	-5.39	41.9616	27.633	27.607	0.02	27.62	-4.94	30.7497				0.732805	-0.448499	0.02404
37		>bta-miR-135a MIMAT0009228	UAUGGCUUUUUAUUCCUAUGUGA		23.16	#DIV/0!	23.16	-9.42	687.397	24.994	24.999	0	25	-7.57	189.493				0.275667	-1.859	#DIV/0!
37		>bta-let-7b MIMAT0004331	UGAGGUAGUAGGUUGUGUGGUU		19.416	#DIV/0!	19.42	-13.17	9210.08	18.411	18.364	0.03	18.39	-14.18	18497				2.00834	1.006	#DIV/0!
37		>bta-miR-141 MIMAT0009232	UAACACUGUCUGGUAAAGAUGG	20.21	20.19	0.01	20.2	-12.38	5348.8	21.35	21.36	0.01	21.36	-11.21	2364.8				0.442117	-1.1775	9e-05
37		>bta-miR-1388-5p MIMAT0013590	AGGACUGUCCAACCUGAGAAU	30.51	30.617	0.08	30.56	-2.02	4.0601	29.132	29.048	0.06	29.09	-3.47	11.1001				2.73398	1.451	0.00212
37		>bta-miR-6523a MIMAT0025552	UCUGGGGUAACUUUGAGCAGGG	27.88	27.929	0.03	27.9	-4.68	25.6431	27.62	27.078	0.38	27.35	-5.21	37.1039				1.44694	0.533001	0.17797
37		>oar-miR-362 MIMAT0030060	AAUCCUUGGAACCUAGGUGUGAGU	26.23	26.27	0.03	26.25	-6.33	80.7281	25.989	26.041	0.04	26.02	-6.55	93.5392				1.15869	0.212501	0.01893
37		18s		32.357	32.813	0.32	32.58	0	1	32.81	32.315	0.35	32.56	0	1				1	0	0.95278
38		>oar-miR-154a-5p MIMAT0019315	UAGGUUAUCCGUGUAGCCUUCG	31.914	31.958	0.03	31.94	5.33	0.0248	34.613	34.673	0.04	34.64	7.99	0.0039				0.158659	-2.656	0.00019
38		>bta-miR-2284ac MIMAT0030447	AAAUGUUCGCUUGGCUUUUUCC	29.979	29.963	0.01	29.97	3.37	0.0968	31.833	32.198	0.26	32.02	5.36	0.0243				0.251129	-1.9935	0.00789
38		>bta-miR-181d MIMAT0009243	AACAUUCAUUGUUGUCGGUGGGU	27.608	27.51	0.07	27.56	0.96	0.5153	26.884	26.855	0.02	26.87	0.22	0.8609				1.67076	0.7405	0.00545
38		>bta-miR-6123 MIMAT0024596	UGCCAAGCCCACGUUCAAAGG	30.489	30.373	0.08	30.43	3.83	0.0704	29.986	29.935	0.04	29.96	3.31	0.101				1.43545	0.521501	0.01766
38		>bta-miR-2284s MIMAT0011811	UGGCCCAAAAGUUUGUUCGGAU	32.634	32.926	0.21	32.78	6.18	0.0138	32.592	32.608	0.01	32.6	5.95	0.0162				1.17365	0.230999	0.34344
38		>bta-miR-7860 MIMAT0030439	UGGAGCGGCUGCACAGAGCGU	29.859	29.987	0.09	29.92	3.32	0.1001	29.275	29.274	0	29.27	2.62	0.1626				1.62394	0.6995	0.0096
38		>bta-miR-2481 MIMAT0012073	UACGUUGUCUGCUGGGUUUU	29.148	28.97	0.13	29.06	2.46	0.1822	27.765	27.912	0.1	27.84	1.18	0.4398				2.41413	1.2715	0.00883
38		18s		26.577	26.628	0.04	26.6	0	1	26.655	26.652	0	26.65	0	1				1	0	0.18397
39		>bta-miR-2284o MIMAT0012068	AAAGUUCGUUCGGGGUUUUC	28.857	29.109	0.18	28.98	2.09	0.2353	29.565	29.855	0.21	29.71	2.74	0.1495				0.635516	-0.654	0.06326
39		>oar-miR-30a-5p MIMAT0030055	UGUAAACAUCCUCGACUGGAAGC	22.376	22.284	0.07	22.33	-4.57	23.6784	23.105	23.053	0.04	23.08	-3.89	14.8203				0.625898	-0.676	0.00494
39		>bta-miR-1225-3p MIMAT0009952	CCGAGCCCCUGUGCCGCCCCCAG	27.133	27.013	0.08	27.07	0.18	0.8842	26.81	26.849	0.03	26.83	-0.14	1.1011				1.24531	0.3165	0.06105
39		>bta-miR-339a MIMAT0009293	UCCCUGUCCUCCAGGAGCUCAC	23.975	23.747	0.16	23.86	-3.03	8.1936	24.362	24.318	0.03	24.34	-2.63	6.1838				0.754713	-0.406	0.05403
39		>bta-miR-544a MIMAT0009346	AUUCUGCAUUUUUAGCAAGUUC	30.007	30.056	0.03	30.03	3.14	0.1138	32.27	32.471	0.14	32.37	5.4	0.0237				0.207905	-2.266	0.00195
39		>bta-miR-4286 MIMAT0024575	ACCCCACUCCUGGUACC	19.57	19.624	0.04	19.6	-7.3	157.423	21.182	21.105	0.05	21.14	-5.83	56.6892				0.360108	-1.4735	0.00092
39		>bta-miR-2320-3p MIMAT0011845	UCGAUGAUGGUCCCUGUGUUUU	29.857	30.014	0.11	29.94	3.04	0.1216	30.289	30.418	0.09	30.35	3.38	0.0957				0.787308	-0.344999	0.05431
39		18s		26.867	26.924	0.04	26.9	0	1	26.974	26.963	0.01	26.97	0	1				1	0	0.12835
40		>bta-miR-2394 MIMAT0011947	UUCUCCCCUCAAUCUCAGGACU	30.382	31.358	0.69	30.87	4.03	0.0612	31.37	32.175	0.57	31.77	4.74	0.0375				0.61323	-0.705501	0.28979
40		>bta-miR-2420 MIMAT0011987	AGGUUGUGUGUUUAUUCUUU	28.971	28.556	0.29	28.76	1.92	0.2636	28.622	28.679	0.04	28.65	1.61	0.3268				1.23971	0.309999	0.64356
40		>bta-miR-2373-3p MIMAT0011919	CGAGCCCGGCACGUGGAAGAGCC	24.551	24.548	0	24.55	-2.29	4.8923	25.958	25.895	0.04	25.93	-1.11	2.1592				0.441351	-1.18	0.00052
40		>bta-miR-18a MIMAT0003526	UAAGGUGCAUCUAGUGCAGAUA	26.018	25.962	0.04	25.99	-0.85	1.8025	25.207	25.215	0.01	25.21	-1.83	3.5455				1.967	0.975999	0.00132
40		>bta-miR-10b MIMAT0003839	UACCCUGUAGAACCGAAUUUGUG	23.646	23.652	0	23.65	-3.19	9.1324	22.606	22.62	0.01	22.61	-4.42	21.4663				2.35055	1.233	5e-05
40		>oar-miR-654-5p MIMAT0019282	AAAGGUGGUGGGCUGCGGAGCAUG	26.34	26.213	0.09	26.28	-0.56	1.4779	27.081	27.037	0.03	27.06	0.02	0.9849				0.666418	-0.585501	0.0073
40		>bta-miR-658 MIMAT0009362	GGCGGAGGGAAGCGGGUCCGUUGGU	27.235	27.146	0.06	27.19	0.35	0.7843	29.303	29.121	0.13	29.21	2.18	0.2214				0.282339	-1.8245	0.0025
40		18s		26.75	26.93	0.13	26.84	0	1	27.039	27.035	0	27.04	0	1				1	0	0.16012
41		>bta-miR-2343 MIMAT0011878	AAGGGGAGACGGUGGAACUUAU	28.607	29.105	0.35	28.86	1.9	0.2675	28.613	28.903	0.21	28.76	1.76	0.2961				1.10688	0.1465	0.76617
41		>bta-miR-2429 MIMAT0011999	AAAAACUUUUCCCUUUUUUU	37.445	37.83	0.27	37.64	10.68	0.0006	36.213	36.21	0	36.21	9.21	0.0017				2.77887	1.4745	0.01774
41		>bta-miR-2473 MIMAT0012064	AAAUUGGCAGAGCUUCCUCUU	29.973	30.048	0.05	30.01	3.06	0.1202	30.856	30.794	0.04	30.83	3.82	0.0707				0.588045	-0.766001	0.00355
41		>bta-miR-216b MIMAT0009266	AAAUCUCUGCAGGCAAAUGUGA	31.156	31.161	0	31.16	4.2	0.0542	30.302	30.494	0.14	30.4	3.4	0.095				1.752	0.809	0.01557
41		>bta-miR-18b MIMAT0003517	UAAGGUGCAUCUAGUGCAGUUA	27.164	27.068	0.07	27.12	0.16	0.8935	27.516	27.531	0.01	27.52	0.52	0.6966				0.779705	-0.359	0.01392
41		>bta-miR-2333 MIMAT0011866	GCAAUGCAGACUCCAGGGCCC	31.235	30.765	0.33	31	4.05	0.0605	Undetermined	30.462	#DIV/0!	30.46	3.46	0.0909				1.5016	0.5865	#DIV/0!
41		>bta-miR-2474 MIMAT0012065	UACCGGGCCAGCUGGAAGGAGA	29.587	29.598	0.01	29.59	2.64	0.1605	29.202	29.195	0	29.2	2.2	0.2182				1.35896	0.4425	0.00027
41		18s		26.909	26.998	0.06	26.95	0	1	26.992	27.012	0.01	27	0	1				1	0	0.39901
42		>bta-miR-1247-3p MIMAT0025550	CGGGAACGUCGGGACUGGAGC	27.04	27.201	0.11	27.12	0.1	0.9353	28.134	28.34	0.15	28.24	1.27	0.4148				0.443498	-1.173	0.01343
42		>bta-miR-2285f MIMAT0024581	AAAACCUGAAUGAACUUUUUGG	30.863	30.668	0.14	30.77	3.74	0.0748	29.966	29.965	0	29.97	3	0.1252				1.67423	0.743501	0.01453
42		>bta-miR-2316 MIMAT0011837	ACUCCGGCCUGGACUGCGGCGGG	29.949	29.986	0.03	29.97	2.94	0.13	29.394	29.307	0.06	29.35	2.38	0.1917				1.47478	0.560501	0.00582
42		>bta-miR-491 MIMAT0009332	AGUGGGGAACCCUUCCAUGAGG	28.974	28.902	0.05	28.94	1.91	0.2654	29.444	29.331	0.08	29.39	2.42	0.1869				0.704173	-0.505999	0.0215
42		>bta-miR-2298 MIMAT0011806	GACUGAUGUUGUUGUUUGCA	31.564	31.468	0.07	31.52	4.49	0.0444	30.513	Undetermined	#DIV/0!	30.51	3.55	0.0856				1.92719	0.9465	#DIV/0!
42		>bta-miR-544b MIMAT0009345	AUUCUGCAUUUCUAACAAGUUC	Undetermined	Undetermined	#DIV/0!	#DIV/0!	#DIV/0!	#DIV/0!	33.395	32.634	0.54	33.01	6.05	0.0151				#DIV/0!	#DIV/0!	#DIV/0!
42		>oar-miR-194 MIMAT0030039	UGUAACAGCAACUCCAUGUGGA	26.11	26.117	0	26.11	-0.91	1.8797	25.029	25.085	0.04	25.06	-1.91	3.7594				2	1	0.00071
42		18s		26.981	27.067	0.06	27.02	0	1	26.978	26.957	0.01	26.97	0	1				1	0	0.32997
43		>bta-miR-2360 MIMAT0011898	CGGGCAGGAGGCUGGAGGCGUU	25.659	25.856	0.14	25.76	-1.62	3.0801	26.59	26.57	0.01	26.58	-0.58	1.4943				0.485149	-1.0435	0.01418
43		>oar-miR-30c MIMAT0030058	UGUAAACAUCCUACACUCUCA	22.15	22.158	0.01	22.15	-5.23	37.4398	22.162	22.132	0.02	22.15	-5.01	32.2785				0.862144	-0.214	0.69624
43		>bta-miR-2475 MIMAT0012066	UGAAGUGUGUGAAACUGCAGCGG	30.382	30.417	0.02	30.4	3.02	0.1234	29.658	31.447	1.27	30.55	3.39	0.0952				0.77164	-0.374001	0.87995
43		>bta-miR-2290 MIMAT0011798	GCCUCUGGUGGUCGGUUUGU	28.206	28.287	0.06	28.25	0.87	0.5487	29.132	29.073	0.04	29.1	1.94	0.2601				0.474014	-1.077	0.00341
43		>oar-miR-380-5p MIMAT0019253	AUGGUUGACCACAGAACAUGCG	33.694	33.606	0.06	33.65	6.27	0.013	34.06	34.183	0.09	34.12	6.96	0.008				0.618781	-0.6925	0.02477
43		>bta-miR-7 MIMAT0003843	UGGAAGACUAGUGAUUUUGUUGUU	27.479	27.598	0.08	27.54	0.16	0.8963	27.038	27.032	0	27.03	-0.12	1.0901				1.2163	0.2825	0.01371
43		>oar-miR-106a MIMAT0030061	AAAAGUGCUUACAGUGCAGGU	26.66	26.669	0.01	26.66	-0.72	1.6426	24.389	24.51	0.09	24.45	-2.71	6.5432				3.9834	1.994	0.00075
43		18s		27.374	27.387	0.01	27.38	0	1	27.15	27.169	0.01	27.16	0	1				1	0	0.0027
44		>bta-miR-216a MIMAT0009265	UAAUCUCAGCUGGCAACUGUGA	31.022	31.014	0.01	31.02	3.51	0.0877	31.207	31.228	0.01	31.22	3.94	0.065				0.740719	-0.433002	0.00316
44		>bta-miR-3141 MIMAT0024573	GAGGGCGGGUGGAGGAGG	25.478	25.555	0.05	25.52	-1.99	3.9751	25.443	25.456	0.01	25.45	-1.82	3.5418				0.891002	-0.1665	0.2283
44		>oar-miR-329b-3p MIMAT0019264	AACACACCUGGUUAACCUCUUU	29.639	29.852	0.15	29.75	2.24	0.212	30.022	29.915	0.08	29.97	2.69	0.1545				0.728752	-0.456501	0.20224
44		>bta-miR-99b MIMAT0004345	CACCCGUAGAACCGACCUUGCG	27.674	27.596	0.06	27.64	0.13	0.9154	25.644	25.498	0.1	25.57	-1.7	3.2558				3.5566	1.8305	0.0016
44		>bta-miR-2344 MIMAT0011879	GCACGAUGAUGGCGGAUCUGAGUU	32.051	31.933	0.08	31.99	4.48	0.0447	32.254	32.615	0.26	32.43	5.16	0.028				0.625897	-0.676003	0.14512
44		>oar-miR-370-3p MIMAT0019244	GCCUGCUGGGGUGGAACCUGGUCU	25.901	25.935	0.02	25.92	-1.59	3.0095	30.582	30.407	0.12	30.49	3.22	0.1073				0.0356488	-4.81	0.00038
44		>bta-miR-504 MIMAT0009340	AGACCCUGGUCUGCACUCUGUC	30.809	30.725	0.06	30.77	3.26	0.1044	29.456	29.394	0.04	29.42	2.15	0.2252				2.15621	1.1085	0.00151
44		18s		27.415	27.6	0.13	27.51	0	1	27.263	27.285	0.02	27.27	0	1				1	0	0.12905
45		>bta-miR-2285y MIMAT0029944	UGUAAACAUCCUUGACUGGAAGCU	21.249	21.333	0.06	21.29	-6.19	72.8067	21.539	21.505	0.02	21.52	-5.78	54.8341				0.753146	-0.408999	0.03639
45		>bta-miR-6527 MIMAT0025561	CACGUGGACGAAGAGAUGGGA	33.872	33.78	0.07	33.83	6.35	0.0123	39.43	32.394	4.98	32.39	5.1	0.0293				2.38502	1.254	0.61336
45		>oar-miR-16b MIMAT0030036	UAGCAGCACGUAAAUAUUGG	22.341	22.26	0.06	22.3	-5.18	36.1645	20.011	19.982	0.02	20	-7.3	157.86				4.36505	2.126	0.00035
45		>bta-miR-2417 MIMAT0011981	AGAUGGAGGCACUGAAAAUUU	Undetermined	Undetermined	#DIV/0!	#DIV/0!	#DIV/0!	#DIV/0!	Undetermined	Undetermined	#DIV/0!	#DIV/0!	#DIV/0!	#DIV/0!				#DIV/0!	#DIV/0!	#DIV/0!
45		>bta-miR-429 MIMAT0009315	UAAUACUGUCUGGUAAUGCCGU	22.031	21.979	0.04	22.01	-5.47	44.385	22.965	22.936	0.02	22.95	-4.35	20.3718				0.458979	-1.1235	0.00099
45		>bta-let-7d MIMAT0003810	AGAGGUAGUAGGUUGCAUAGUU	24.657	24.691	0.02	24.67	-2.8	6.9789	23.432	23.46	0.02	23.45	-3.85	14.45				2.07053	1.05	0.00032
45		>bta-miR-2415-3p MIMAT0011979	CCAGGCCUGCUGGACCGACGC	31.558	31.629	0.05	31.59	4.12	0.0577	30.817	30.936	0.08	30.88	3.58	0.0838				1.45296	0.539	0.00921
45		18s		27.461	27.493	0.02	27.48	0	1	27.262	27.336	0.05	27.3	0	1				1	0	0.04765
46		>bta-miR-2288 MIMAT0011795	AGGUAGUAGGUGUGUGGUUU	28.254	28.247	0	28.25	0.61	0.6568	28.315	28.508	0.14	28.41	0.61	0.6547				0.996885	-0.00450039	0.23738
46		>bta-miR-10a MIMAT0003786	UACCCUGUAGAUCCGAAUUUGUG	25	24.996	0	25	-2.65	6.2593	23.468	23.455	0.01	23.46	-4.34	20.2381				3.23328	1.693	2e-05
46		>bta-miR-34a MIMAT0004340	UGGCAGUGUCUUAGCUGGUUGU	27.217	27.175	0.03	27.2	-0.45	1.3641	26.958	26.832	0.09	26.9	-0.91	1.8732				1.37316	0.457499	0.04539
46		>bta-miR-2413 MIMAT0011975	UCGGACCCAGGGGGACUGCGGU	33.257		#DIV/0!	33.26	5.61	0.0204	33.816	33.839	0.02	33.83	6.03	0.0153				0.750539	-0.414001	#DIV/0!
46		>bta-miR-1584-3p MIMAT0011970	CUCUCUCCGCAGACCUCAGCCG	Undetermined	Undetermined	#DIV/0!	#DIV/0!	#DIV/0!	#DIV/0!	Undetermined	Undetermined	#DIV/0!	#DIV/0!	#DIV/0!	#DIV/0!				#DIV/0!	#DIV/0!	#DIV/0!
46		>oar-miR-758-5p MIMAT0019261	UGGUUGACCAGAGAGCACACG	35.06		#DIV/0!	35.06	7.42	0.0059	34.271	Undetermined	#DIV/0!	34.27	6.47	0.0113				1.92586	0.945501	#DIV/0!
46		>oar-miR-379-3p MIMAT0019248	UAUGUAACAUGGUCCACUAACU	28.602	28.564	0.03	28.58	0.94	0.5216	29.107	29.184	0.05	29.15	1.35	0.3937				0.754712	-0.406001	0.00578
46		18s		27.673	27.615	0.04	27.64	0	1	27.705	27.896	0.14	27.8	0	1				1	0	0.25741
47		>oar-miR-21 MIMAT0014966	UAGCUUAUCAGACUGAUGUUGAC	21.031	20.977	0.04	21	-6.57	95.1413	18.152	18.186	0.02	18.17	-9.76	867.067				9.11347	3.188	0.00013
47		>bta-miR-6531 MIMAT0025567	UAGACUUGGUGUACUUUGAGAGA	33.782	33.154	0.44	33.47	5.89	0.0168	34.288		#DIV/0!	34.29	6.36	0.0122				0.723469	-0.466997	#DIV/0!
47		>bta-miR-2284y MIMAT0024579	AAAAGUUCGUUCGGGUUUUUC	29.61	29.155	0.32	29.38	1.81	0.2859	30.968	31.058	0.06	31.01	3.08	0.1179				0.41251	-1.2775	0.01964
47		>bta-miR-28 MIMAT0009272	AAGGAGCUCACAGUCUAUUGAG	24.424	24.27	0.11	24.35	-3.23	9.3762	24.022	24.006	0.01	24.01	-3.92	15.0846				1.60882	0.686001	0.05002
47		>oar-miR-376e-5p MIMAT0019277	GGUGGAUAUUCCUUCUAUGUUU	27.617	27.511	0.07	27.56	-0.01	1.0084	30.295	30.248	0.03	30.27	2.34	0.1972				0.195535	-2.3545	0.00046
47		>bta-miR-208a MIMAT0009261	AUAAGACGAGCAAAAAGCUUGU	26.591	25.325	0.9	25.96	-1.62	3.0695	26.894	27.125	0.16	27.01	-0.92	1.8915				0.616213	-0.698499	0.24384
47		>bta-miR-378 MIMAT0009305	ACUGGACUUGGAGUCAGAAGGC	24.876	24.901	0.02	24.89	-2.69	6.442	26.338	26.365	0.02	26.35	-1.58	2.9845				0.463294	-1.11	0.00016
47		18s		27.553	27.599	0.03	27.58	0	1	27.79	28.068	0.2	27.93	0	1				1	0	0.12915
48		>bta-miR-7865 MIMAT0030450	CAGGGAGGGCAGGGGAGGG	28.128	28.249	0.09	28.19	-0.27	1.2058	26.897	26.998	0.07	26.95	-1.65	3.1362				2.60088	1.379	0.00401
48		>bta-miR-2284w MIMAT0017393	AAGAGUUUGUUCGGGUUUCUC	30.201	30.287	0.06	30.24	1.79	0.2901	34.589	34.439	0.11	34.51	5.92	0.0165				0.0570354	-4.132	0.00041
48		>bta-miR-15b MIMAT0003792	UAGCAGCACAUCAUGGUUUACA	26.069	26.037	0.02	26.05	-2.41	5.2982	24.704	24.669	0.02	24.69	-3.91	15.0324				2.83726	1.5045	0.0003
48		>bta-miR-2287 MIMAT0011794	CUGGGACUGGUGGCAGCACUU	29.735	29.917	0.13	29.83	1.37	0.3876	28.881	Undetermined	#DIV/0!	28.88	0.28	0.821				2.11844	1.083	#DIV/0!
48		>bta-miR-615 MIMAT0009355	GGGGGUCCCCGGUGCUCGGAUC	29.452	29.487	0.02	29.47	1.01	0.4962	Undetermined	38.779	#DIV/0!	38.78	10.18	0.0009				0.00173422	-9.1715	#DIV/0!
48		>bta-miR-2347 MIMAT0011882	UGCAGAGGAACAAGGCUGAAC	32.298	32.228	0.05	32.26	3.8	0.0716	30.028	30.022	0	30.02	1.43	0.3715				5.19096	2.376	0.00025
48		>oar-miR-376a-3p MIMAT0019287	AUCAUAGAGGAAAAUCCACGU	25.312	26.687	0.97	26	-2.46	5.4984	28.387	28.198	0.13	28.29	-0.3	1.2346				0.224533	-2.155	0.08067
48		18s		28.405	28.512	0.08	28.46	0	1	28.572	28.621	0.03	28.6	0	1				1	0	0.14365
49		>bta-miR-214 MIMAT0003825	ACAGCAGGCACAGACAGGCAGU	26.653	26.666	0.01	26.66	-0.01	1.0091	23.284	23.283	0	23.28	-3.03	8.1596				8.08641	3.0155	0
49		>bta-miR-2486-5p MIMAT0012081	GGAGAAGCACGGUGUAGGGUGGG	33.042	32.811	0.16	32.93	6.25	0.0131	32.416	32.529	0.08	32.47	6.16	0.014				1.06696	0.0935001	0.07169
49		>bta-miR-2307 MIMAT0011819	AGUGAUGAUGAACCCUCUGAGC	33.302	32.987	0.22	33.14	6.47	0.0113	33.958	33.3	0.47	33.63	7.32	0.0063				0.55671	-0.845001	0.31538
49		>bta-miR-2331-5p MIMAT0011863	GGCUUCCGUGCCUGCAGAUGUCU	31.336	31.183	0.11	31.26	4.59	0.0416	30.029	29.806	0.16	29.92	3.61	0.0822				1.97452	0.981501	0.01
49		>oar-miR-221 MIMAT0030047	AGCUACAUUGUCUGCUGGGUUU	25.303	25.233	0.05	25.27	-1.4	2.6473	Undetermined	21.939	#DIV/0!	21.94	-4.37	20.7207				7.82722	2.9685	#DIV/0!
49		>bta-miR-2285i MIMAT0024584	AAAACCGGAACGAACUUUUUGG	33.009	33.065	0.04	33.04	6.36	0.0121	33.124	32.825	0.21	32.97	6.66	0.0099				0.813378	-0.298002	0.72099
49		>bta-miR-24-3p MIMAT0003840	UGGCUCAGUUCAGCAGGAACAG	20.123	20.258	0.1	20.19	-6.48	89.3874	18.431	18.43	0	18.43	-7.88	235.813				2.6381	1.3995	0.00147
49		18s		26.685	26.66	0.02	26.67	0	1	26.289	26.335	0.03	26.31	0	1				1	0	0.00523
50		>bta-miR-329b MIMAT0009289	AGAGGUUUUCUGGGUUUCUGUUU	31.878	32.027	0.11	31.95	5.15	0.0282	31.011	30.983	0.02	31	4.59	0.0415				1.47376	0.559501	0.00624
50		>bta-miR-1301 MIMAT0009958	UUGCAGCUGCCUAGGAGUGAUUUC	35.358	34.302	0.75	34.83	8.03	0.0038	34.284	34.127	0.11	34.21	7.8	0.0045				1.17162	0.2285	0.36259
50		>bta-miR-204 MIMAT0004338	UUCCCUUUGUCAUCCUAUGCCU	16.583	16.551	0.02	16.57	-10.23	1205.15	16.417	16.572	0.11	16.49	-9.91	963.072				0.799129	-0.3235	0.4563
50		>bta-miR-2291 MIMAT0011799	GCUGAUAGUGAGCGACUGGGGCAG	33.919	34.056	0.1	33.99	7.19	0.0069	32.113	31.328	0.56	31.72	5.31	0.0251				3.65786	1.871	0.02953
50		>bta-miR-1306 MIMAT0009974	CCACCUCCCCUGCAAACGUCC	29.325	29.272	0.04	29.3	2.5	0.1772	27.243	27.122	0.09	27.18	0.78	0.5838				3.29436	1.72	0.00097
50		>bta-miR-2888 MIMAT0013846	GGUGGGGUGGGGGGGUUGG	26.118	25.919	0.14	26.02	-0.78	1.7213	25.434	25.243	0.14	25.34	-1.07	2.0958				1.21757	0.284	0.03876
50		>bta-miR-212 MIMAT0009264	ACCUUGGCUCUAGACUGCUUACU	30.846	31.149	0.21	31	4.2	0.0546	31.273	31.234	0.03	31.25	4.85	0.0347				0.636398	-0.651999	0.23574
50		18s		26.701	26.903	0.14	26.8	0	1	26.403	26.409	0	26.41	0	1				1	0	0.05937
51		>bta-miR-4523 MIMAT0036971	GACCGAGAGGGCCUCGGCUGU	35.773	36.006	0.16	35.89	8.91	0.0021	34.658	34.452	0.15	34.56	8.21	0.0034				1.62958	0.704499	0.01331
51		>bta-miR-1814a MIMAT0011874	AGGUUUUUUGGUUUUGUUUU	34.607	34.762	0.11	34.68	7.71	0.0048	34.037	33.687	0.25	33.86	7.51	0.0055				1.14274	0.1925	0.05011
51		>bta-miR-6516 MIMAT0030443	UUUGCAGUAACAGGUGUGAAC	30.485	30.529	0.03	30.51	3.53	0.0867	30.205	30.056	0.11	30.13	3.78	0.0727				0.838859	-0.2535	0.04003
51		>oar-miR-374b MIMAT0030063	AUAUAAUACAACCUGCUAAGU	24.352	24.339	0.01	24.35	-2.63	6.2053	23.077	23.074	0	23.08	-3.27	9.6699				1.55833	0.64	3e-05
51		>bta-miR-30f MIMAT0009282	UGUAAACACCCUACACUCUCAGCU	27.071	27.235	0.12	27.15	0.17	0.8864	26.565	27.043	0.34	26.8	0.45	0.7295				0.82302	-0.281	0.30129
51		>bta-miR-129 MIMAT0009220	CUUUUUGCGGUCUGGGCUUGCU	34.053	33.74	0.22	33.9	6.92	0.0083	33.605	33.277	0.23	33.44	7.09	0.0073				0.886075	-0.174499	0.18224
51		>bta-miR-2464-3p MIMAT0012052	CUCCAGAGCUGAGCAGAACUG	32.431	32.334	0.07	32.38	5.4	0.0236	31.542	31.531	0.01	31.54	5.19	0.0274				1.16151	0.216	0.00331
51		18s		26.979	26.979	0	26.98	0	1	26.352	26.346	0	26.35	0	1				1	0	2e-05
52		>bta-miR-7861 MIMAT0030441	UGCUACCUAGUCUGAGUGAGUGA	28.547	28.423	0.09	28.49	1.65	0.319	27.42	27.618	0.14	27.52	1.01	0.4952				1.5524	0.6345	0.01431
52		>bta-miR-2443 MIMAT0012018	UGAGGGCAGGACCGUAUGAGGUGU	37.407	36.969	0.31	37.19	10.35	0.0008	35.523	35.079	0.31	35.3	8.8	0.0022				2.93936	1.5555	0.02624
52		>bta-miR-345-5p MIMAT0003800	GCUGACUCCUAGUCCAGUGCU	24.739	24.672	0.05	24.71	-2.13	4.3802	27.092	27.021	0.05	27.06	0.55	0.6823				0.155771	-2.6825	0.00043
52		>bta-miR-24 MIMAT0009250	GUGCCUACUGAGCUGAUAUCAGU	27.99	28.118	0.09	28.05	1.22	0.43	27.254	27.179	0.05	27.22	0.71	0.6107				1.42011	0.505999	0.00775
52		>bta-miR-2327 MIMAT0011856	AGGGGGCGAGACUCAAGCACUGGC	34.66	34.523	0.1	34.59	7.75	0.0046	33.687	33.34	0.25	33.51	7.01	0.0078				1.67772	0.746498	0.02866
52		>bta-miR-2431-5p MIMAT0012001	CAGGUCAUAUAAGUGUGGAGUU	33.395	33.394	0	33.39	6.56	0.0106	33.256	33.988	0.52	33.62	7.12	0.0072				0.678772	-0.559	0.59763
52		>bta-miR-759 MIMAT0009371	GCAGACUGCAAACAAUUUUGAC	34.837	33.974	0.61	34.41	7.57	0.0053	33.316	33.415	0.07	33.37	6.86	0.0086				1.6341	0.708498	0.13896
52		18s		26.872	26.801	0.05	26.84	0	1	26.432	26.578	0.1	26.5	0	1				1	0	0.05506
53		>bta-miR-6122-3p MIMAT0024595	ACUAUAUGAUGUAAACUGAAC	32.463	32.416	0.03	32.44	6.04	0.0152	34.989	35.041	0.04	35.01	8.49	0.0028				0.183011	-2.45	0.00019
53		>bta-miR-2284t-3p MIMAT0011832	AAACUCGAAUGAAUGUUUUGGC	32.57	33.058	0.35	32.81	6.42	0.0117	35.593	35.085	0.36	35.34	8.82	0.0022				0.18953	-2.3995	0.01891
53		>bta-miR-2389 MIMAT0011942	GAGGGGACUCGGGAGUCGGAG	34.529	32.738	1.27	33.63	7.24	0.0066	29.406	29.454	0.03	29.43	2.91	0.1332				20.0983	4.329	0.04254
53		>oar-miR-544-3p MIMAT0019299	AUUCUGCAUUUUUAGCAAGUU	34.287	32.935	0.96	33.61	7.22	0.0067	32.687	32.816	0.09	32.75	6.23	0.0133				1.97931	0.985	0.3331
53		>bta-miR-2378 MIMAT0011924	UGUGGGUUGUCUGAGCAAGGG	24.942	25.569	0.44	25.26	-1.14	2.2046	30.846	30.481	0.26	30.66	4.14	0.0566				0.0256927	-5.2825	0.00447
53		>bta-miR-7864 MIMAT0030449	CUUCCUCUUCCGGUUGGCAGA	25.026	25.793	0.54	25.41	-0.99	1.9814	35.578	35.827	0.18	35.7	9.18	0.0017				0.000869516	-10.1675	0.00153
53		>bta-miR-361 MIMAT0003830	UUAUCAGAAUCUCCAGGGGUAC	26.425	27.151	0.51	26.79	0.39	0.7621	23.51	23.637	0.09	23.57	-2.95	7.7168				10.1261	3.34	0.01289
53		18s		26.396	Undetermined	#DIV/0!	26.4	0	1	26.555	26.488	0.05	26.52	0	1				1	0	#DIV/0!
54		>bta-miR-196a MIMAT0009255	UAGGUAGUUUCAUGUUGUUGGG	26.605	26.624	0.01	26.61	-0.45	1.3679	24.019	24.023	0	24.02	-2.69	6.442				4.70926	2.2355	1e-05
54		>oar-miR-3957-3p MIMAT0019326	ACGCACAGCACCUCACUGAGCU	31.105	31.04	0.05	31.07	4.01	0.0622	29.578	29.468	0.08	29.52	2.81	0.1422				2.2839	1.1915	0.0017
54		>bta-miR-532 MIMAT0003848	CAUGCCUUGAGUGUAGGACCGU	28.274	28.261	0.01	28.27	1.2	0.435	26.924	26.977	0.04	26.95	0.24	0.8456				1.94396	0.959001	0.00043
54		>bta-miR-2438 MIMAT0012012	UGGGGUGUGUGCUGGAGCCUGCU	28.94	28.511	0.3	28.73	1.66	0.3167	28.893	28.569	0.23	28.73	2.02	0.2461				0.777277	-0.3635	0.98553
54		>oar-miR-377-5p MIMAT0019321	AGAGGUUGCCUUUGGUGAAUUC	31.851	31.877	0.02	31.86	4.8	0.036	32.958	32.763	0.14	32.86	6.15	0.0141				0.39107	-1.3545	0.0096
54		>bta-miR-2892 MIMAT0013850	GGCGACGGAGGCGCGACCCCCC	27.859	27.828	0.02	27.84	0.78	0.5836	27.644	27.386	0.18	27.51	0.81	0.5718				0.97976	-0.0295	0.12725
54		>bta-miR-381 MIMAT0009307	UAUACAAGGGCAAGCUCUCUGU	29.833	29.86	0.02	29.85	2.78	0.1456	30.396	30.605	0.15	30.5	3.79	0.0722				0.495859	-1.012	0.02499
54		18s		27.064	27.069	0	27.07	0	1	26.792	26.625	0.12	26.71	0	1				1	0	0.05037
55		>bta-miR-2310 MIMAT0011822	GUUUUGUUUGGGUUUGUUUCU	33.48	33.833	0.25	33.66	6.62	0.0102	30.66	32.207	1.09	31.43	4.63	0.0403				3.95177	1.9825	0.10727
55		>bta-miR-27b MIMAT0003546	UUCACAGUGGCUAAGUUCUGC	Undetermined	Undetermined	#DIV/0!	#DIV/0!	#DIV/0!	#DIV/0!	Undetermined	Undetermined	#DIV/0!	#DIV/0!	#DIV/0!	#DIV/0!				#DIV/0!	#DIV/0!	#DIV/0!
55		>bta-miR-380-5p MIMAT0003803	UGGUUGACCAUAGAACAUGCGC	35.992	36.832	0.59	36.41	9.37	0.0015	34.2	37.531	2.36	35.87	9.07	0.0019				1.23628	0.306002	0.78051
55		>bta-miR-2304 MIMAT0011816	GGUUGUGUGGUUGUGUGUGU	32.546	32.53	0.01	32.54	5.5	0.0221	28.928	30.881	1.38	29.9	3.1	0.1163				5.25249	2.393	0.11439
55		>bta-miR-2901 MIMAT0013859	CCGAGUGCUCCCGCGAGCGCU	30.835	30.643	0.14	30.74	3.7	0.077	29.317	30.914	1.13	30.12	3.32	0.1004				1.30405	0.383	0.5193
55		>oar-miR-25 MIMAT0030050	AUUGCACUUGUCUCGGUCUGA	23.976	23.993	0.01	23.98	-3.06	8.3166	21.659	21.889	0.16	21.77	-5.03	32.5819				3.91768	1.97	0.00271
55		>bta-miR-582 MIMAT0009351	UUACAGUUGUUCAACCAGUUACU	26.298	26.108	0.13	26.2	-0.84	1.787	27.247	27.597	0.25	27.42	0.62	0.6498				0.363619	-1.4595	0.02566
55		18s		26.851	27.23	0.27	27.04	0	1	26.731	26.869	0.1	26.8	0	1				1	0	0.35535
56		>bta-miR-302a MIMAT0009278	AAGUGCUUCCAUGUUUUAGUGA	Undetermined	Undetermined	#DIV/0!	#DIV/0!	#DIV/0!	#DIV/0!	Undetermined	Undetermined	#DIV/0!	#DIV/0!	#DIV/0!	#DIV/0!				#DIV/0!	#DIV/0!	#DIV/0!
56		>bta-miR-2482 MIMAT0012074	GUAGUUUUCUUUGUCGUUUU	33.556	33.71	0.11	33.63	7.3	0.0063	32.781	33.227	0.32	33	6.93	0.0082				1.29325	0.371	0.11659
56		>bta-miR-2328-5p MIMAT0011857	GCCCCCUCCCUUGGUCGCCGG	32.849	33.153	0.21	33	6.67	0.0098	31.384	31.498	0.08	31.44	5.37	0.0242				2.4657	1.302	0.01066
56		>bta-miR-320b MIMAT0011991	AGCUGGGUUGAGAGGGUGGU	27.609	27.629	0.01	27.62	1.29	0.4092	27.044	27.151	0.08	27.1	1.03	0.4912				1.20039	0.2635	0.01072
56		>bta-miR-6529a MIMAT0025565	GAGAGAUCAGAGGCGCAGAGU	30.642	30.695	0.04	30.67	4.34	0.0494	28.588	28.602	0.01	28.59	2.52	0.174				3.51982	1.8155	0.00017
56		>bta-miR-3660 MIMAT0025555	ACUGACAGGAGAGCAUUUUAA	32.544	32.052	0.35	32.3	5.97	0.016	30.539	30.797	0.18	30.67	4.6	0.0413				2.58829	1.372	0.02783
56		>bta-miR-25 MIMAT0003853	CAUUGCACUUGUCUCGGUCUGA	23.422	23.514	0.07	23.47	-2.86	7.2702	21.367	21.469	0.07	21.42	-4.65	25.1764				3.46295	1.792	0.00112
56		18s		26.322	26.338	0.01	26.33	0	1	25.944	26.2	0.18	26.07	0	1				1	0	0.18192
57		>bta-miR-2346 MIMAT0011881	ACUGAUGUGAAGGUGGUUUGGC	27.0678	27.0086	0.04	27.04	-1.94	3.8448	26.6625	26.9069	0.17	26.78	-2.15	4.4362				1.15384	0.206443	0.18126
57		>bta-miR-23b-3p MIMAT0003852	AUCACAUUGCCAGGGAUUACCAC	23.5766	23.6397	0.04	23.61	-5.37	41.4392	22.5075	22.613	0.07	22.56	-6.37	82.9248				2.00112	1.00081	0.00342
57		>oar-miR-323c MIMAT0019335	CACAAUACACGGUCGGCCUCU	32.3347	32.5186	0.13	32.43	3.45	0.0918	34.8352	34.8793	0.03	34.86	5.92	0.0165				0.179531	-2.4777	0.00151
57		>oar-miR-107 MIMAT0030029	AGCAGCAUUGUACAGGGCUAUC	23.7704	23.7639	0	23.77	-5.21	37.1157	25.9497	26.2213	0.19	26.09	-2.85	7.2024				0.194053	-2.36548	0.00342
57		>bta-miR-2309 MIMAT0011821	UGUGAGGGUGGUGGACGGCAGGG	34.334	34.3207	0.01	34.33	5.35	0.0246	32.8723	33.1018	0.16	32.99	4.05	0.0602				2.45077	1.29324	0.00727
57		>bta-miR-6526 MIMAT0025556	UCCUGUGCCUCGAAUGGGUAUG	36.953	36.9625	0.01	36.96	7.98	0.004	36.2055	36.1063	0.07	36.16	7.22	0.0067				1.68739	0.754791	0.00384
57		>oar-miR-382-3p MIMAT0019307	AAUCAUUCACGGACAACACUU	32.8447	32.9556	0.08	32.9	3.92	0.0661	32.5054	32.3569	0.1	32.43	3.5	0.0886				1.33971	0.421921	0.03688
57		18s		28.923	29.0391	0.08	28.98	0	1	28.8963	28.9717	0.05	28.93	0	1				1	0	0.56658
58		>bta-miR-2284q MIMAT0011957	GGCCAAAAAGUUCGUUCGGA	29.26	29.344	0.06	29.3	2.4	0.1901	29.105	28.351	0.53	28.73	2.29	0.2044				1.07549	0.105	0.2694
58		>bta-miR-29e MIMAT0009953	UAGCAUCAUUUGAAAUCAGUGUUU	23.952	24.029	0.05	23.99	-2.92	7.5475	23.26	23.476	0.15	23.37	-3.07	8.3948				1.11226	0.1535	0.03229
58		>bta-miR-17-3p MIMAT0003816	ACUGCAGUGAAGGCACUUGU	26.83	26.769	0.04	26.8	-0.11	1.077	26.601	26.64	0.03	26.62	0.18	0.8809				0.817902	-0.29	0.03855
58		>oar-miR-382-5p MIMAT0019306	GAAGUUGUUCGUGGUGGAUUCG	28.637	28.594	0.03	28.62	1.71	0.3059	27.762	27.776	0.01	27.77	1.33	0.3974				1.29909	0.377501	0.00071
58		>bta-miR-106a MIMAT0003784	AAAAGUGCUUACAGUGCAGGUA	26.737	26.73	0	26.73	-0.17	1.1274	24.649	24.761	0.08	24.7	-1.73	3.323				2.94752	1.5595	0.00076
58		>bta-miR-7857 MIMAT0030432	AUAGCCAGUUGGGGAAGAAUGC	34.885	35.348	0.33	35.12	8.21	0.0034	33.03	33.075	0.03	33.05	6.61	0.0102				3.02094	1.595	0.01246
58		>bta-miR-34b MIMAT0003549	AGGCAGUGUAAUUAGCUGAUUG	31.903	31.654	0.18	31.78	4.87	0.0341	30.614	30.986	0.26	30.8	4.36	0.0486				1.42356	0.5095	0.04854
58		18s		26.938	26.875	0.04	26.91	0	1	26.421	26.454	0.02	26.44	0	1				1	0	0.0057
59		>bta-miR-2285l MIMAT0024587	AAAACCCGCAUGAACUUUUUGGC	32.801	32.73	0.05	32.77	6.02	0.0154	29.976	29.931	0.03	29.95	3.9	0.0669				4.34091	2.118	0.00022
59		>bta-miR-342 MIMAT0003846	UCUCACACAGAAAUCGCACCCAUCU	22.808	22.878	0.05	22.84	-3.9	14.9596	21.078	20.971	0.08	21.02	-5.03	32.6158				2.18026	1.1245	0.00123
59		>bta-miR-199a-3p MIMAT0003746	ACAGUAGUCUGCACAUUGGUUA	22.713	22.642	0.05	22.68	-4.07	16.778	19.315	19.324	0.01	19.32	-6.73	106.337				6.33788	2.664	0.00011
59		>oar-miR-381-5p MIMAT0019292	AGCGAGGUUGCCCUUUGUAU	31.736	31.453	0.2	31.59	4.85	0.0347	31.27	31.446	0.12	31.36	5.31	0.0253				0.728247	-0.4575	0.29163
59		>bta-miR-2386 MIMAT0011938	UGUUUGGUUUUUCGUUUUCC	36.19	37.33	0.81	36.76	10.01	0.001	35.944	35.66	0.2	35.8	9.75	0.0012				1.2008	0.264	0.2445
59		>bta-miR-2430 MIMAT0012000	UCUGGGUCGGCAGGGGUUUCCGG	32.289	32.13	0.11	32.21	5.46	0.0227	31.239	31.261	0.02	31.25	5.2	0.0272				1.20205	0.265501	0.00692
59		>oar-miR-23a MIMAT0030048	AUCACAUUGCCAGGGAUUUCCA	20.141	20.211	0.05	20.18	-6.57	95.0095	18.644	18.679	0.02	18.66	-7.39	167.788				1.76602	0.8205	0.00067
59		18s		26.681	26.811	0.09	26.75	0	1	25.87	26.234	0.26	26.05	0	1				1	0	0.06955
60		>bta-miR-2382-3p MIMAT0011931	CUACUUCCUGGUGCCUCGCCCCAC	36.54	36.746	0.15	36.64	9.79	0.0011	31.605	31.834	0.16	31.72	5.8	0.0179				15.7907	3.981	0.00098
60		>bta-miR-2436-5p MIMAT0012008	CGGCGCAGCUGUCGGGAGGGCG	29.728	29.688	0.03	29.71	2.85	0.1386	28.66	28.691	0.02	28.68	2.76	0.1476				1.06437	0.0900002	0.0006
60		>bta-miR-1777b MIMAT0012046	GGGGGCGGUGGGGGGCGGGG	26.453	26.772	0.23	26.61	-0.25	1.1851	24.457	24.658	0.14	24.56	-1.36	2.5624				2.1622	1.1125	0.00831
60		>oar-miR-376c-5p MIMAT0019279	GUGGAUAUUCCGUCUAUGUUU	30.917	31.013	0.07	30.97	4.11	0.058	32.208	32.539	0.23	32.37	6.46	0.0114				0.19601	-2.351	0.01464
60		>oar-miR-376b-5p MIMAT0019284	GGUGGAUAUUCCUUCUAUGUUU	25.758	25.666	0.07	25.71	-1.15	2.2122	26.728	26.703	0.02	26.72	0.8	0.5742				0.259535	-1.946	0.00225
60		>bta-miR-2471-5p MIMAT0012061	GAGGAUCUGUCUAAUCUCAGAGG	33.985	34.884	0.64	34.43	7.58	0.0052	33.128	32.496	0.45	32.81	6.9	0.0084				1.60214	0.680001	0.0981
60		>bta-miR-1287 MIMAT0009971	UGCUGGAUCAGUGGUUUGAGUC	30.529	30.747	0.15	30.64	3.78	0.0728	31.01	31.433	0.3	31.22	5.31	0.0253				0.347239	-1.526	0.13372
60		18s		26.862	26.853	0.01	26.86	0	1	25.843	25.987	0.1	25.91	0	1				1	0	0.00581
61		>bta-miR-6520 MIMAT0025538	UUGAGUAUUGUCAGAGAGAGC	31.145	31.611	0.33	31.38	4.04	0.0607	31.385	31.246	0.1	31.32	4.23	0.0535				0.881175	-0.1825	0.82117
61		>bta-miR-1843 MIMAT0011990	AAGCUUCGUGGUCUCUGUCUUGCC	30.202	30.148	0.04	30.18	2.84	0.1397	30.043	30.145	0.07	30.09	3	0.1247				0.892547	-0.164	0.29555
61		>bta-miR-2285w MIMAT0029945	ACCAAAAGUUCAUUCAGAUUU	33.228	33.479	0.18	33.35	6.02	0.0154	32.906	32.515	0.28	32.71	5.62	0.0203				1.31768	0.398002	0.10951
61		>bta-miR-2285ac MIMAT0030440	AAAACCUGAAGAGACUUUUUGG	31.863	31.907	0.03	31.89	4.55	0.0427	31.144	31.137	0	31.14	4.05	0.0604				1.41372	0.499501	0.00089
61		>bta-miR-2366 MIMAT0011904	UGGGUCACAGAAGAGGGUCUGG	32.222	32.033	0.13	32.13	4.79	0.0361	30.803	30.522	0.2	30.66	3.57	0.0841				2.32947	1.22	0.0131
61		>bta-miR-222 MIMAT0003530	AGCUACAUCUGGCUACUGGGU	26.915	27.015	0.07	26.97	-0.37	1.2928	25.021	25.197	0.12	25.11	-1.98	3.949				3.05464	1.611	0.00296
61		>bta-miR-335 MIMAT0009291	UCAAGAGCAAUAACGAAAAAUGU	26.208	26.212	0	26.21	-1.13	2.1818	Undetermined	Undetermined	#DIV/0!	#DIV/0!	#DIV/0!	#DIV/0!				#DIV/0!	#DIV/0!	#DIV/0!
61		18s		27.404	27.267	0.1	27.34	0	1	27.029	27.152	0.09	27.09	0	1				1	0	0.11693
62		>bta-miR-181a MIMAT0003543	AACAUUCAACGCUGUCGGUGAGUU	24.236	23.169	0.75	23.17	-4.06	16.6563	23.613	23.71	0.07	23.66	-3.4	10.5488				0.633317	-0.658999	0.94596
62		>bta-miR-340 MIMAT0009296	UCCGUCUCAGUUACUUUAUAGCC	27.676	27.587	0.06	27.63	0.4	0.7555	27.729	27.635	0.07	27.68	0.62	0.65				0.860353	-0.217	0.51694
62		>bta-miR-2297 MIMAT0011805	CACUCUUUUUUCUUAUUCCU	27.674	27.329	0.24	27.5	0.27	0.8267	33.813	33.304	0.36	33.56	6.5	0.0111				0.0133826	-6.2235	0.00257
62		>bta-miR-331-3p MIMAT0004339	GCCCCUGGGCCUAUCCUAGAA	32.225	31.504	0.51	31.86	4.64	0.0402	31.453	31.15	0.21	31.3	4.24	0.0529				1.31631	0.3965	0.28659
62		>oar-miR-493-5p MIMAT0019237	UUGUACAUGGUAGGCUUUCAUU	27.277	27.252	0.02	27.26	0.04	0.9743	27.846	27.848	0	27.85	0.79	0.5797				0.595016	-0.749	0.00046
62		>bta-miR-489 MIMAT0009942	GUGACAUCACAUAUAUGGCGAC	33.546	33.972	0.3	33.76	6.53	0.0108	32.54	32.952	0.29	32.75	5.69	0.0194				1.79813	0.8465	0.07595
62		>bta-miR-1193 MIMAT0009965	UAGGUCACCCGUUUGACUAUC	33.35	33.056	0.21	33.2	5.98	0.0159	34.327	34.918	0.42	34.62	7.56	0.0053				0.333094	-1.586	0.05004
62		18s		27.221	27.233	0.01	27.23	0	1	27.042	27.079	0.03	27.06	0	1				1	0	0.01337
63		>bta-miR-2284l MIMAT0011824	AAAAGUUGGUUCGGGUUUUU	32.24	31.826	0.29	32.03	4.78	0.0363	32.254	32.618	0.26	32.44	5.28	0.0257				0.708088	-0.498	0.28122
63		>bta-miR-449b MIMAT0009321	AGGCAGUGUAUUGUUAGCUGGC	31.877	31.437	0.31	31.66	4.41	0.0472	31.284	31.188	0.07	31.24	4.08	0.0591				1.25353	0.326	0.20246
63		>bta-miR-599 MIMAT0009354	GUUGUGUCAGUUUAUCAAAC	31.903	31.522	0.27	31.71	4.46	0.0454	32.292	32.151	0.1	32.22	5.07	0.0299				0.657927	-0.604001	0.12912
63		>bta-miR-671 MIMAT0009365	AGGAAGCCCUGGAGGGGCUGGAG	28.013	28.035	0.02	28.02	0.77	0.585	28.178	28.187	0.01	28.18	1.03	0.4907				0.838859	-0.2535	0.00558
63		>bta-miR-2408 MIMAT0011966	CACGUGUGUGAGCUCAGCCGG	31.397	31.262	0.1	31.33	4.08	0.0592	30.954	30.627	0.23	30.79	3.64	0.0805				1.36037	0.443998	0.09293
63		>bta-miR-2450b MIMAT0012029	CAUGGUCAGUAGAGGUGCAUGUG	30.379	30.448	0.05	30.41	3.16	0.1116	31.16	30.92	0.17	31.04	3.88	0.0677				0.606466	-0.7215	0.0375
63		>bta-miR-2285g MIMAT0024582	AAACCUGAACAAGCUUUUUGG	33.174	33.08	0.07	33.13	5.88	0.017	31.263	31.571	0.22	31.42	4.26	0.0521				3.06312	1.615	0.00875
63		18s		27.245	27.256	0.01	27.25	0	1	27.132	27.179	0.03	27.16	0	1				1	0	0.0589
64		>bta-miR-505 MIMAT0009341	CGUCAACACUUGCUGGUUUCCU	26.635	26.885	0.18	26.76	-0.85	1.8056	27.989	27.967	0.02	27.98	0.68	0.6239				0.345558	-1.533	0.01045
64		>bta-miR-412 MIMAT0009313	ACUUCACCUGGUCCACUAGCUGU	31.488	31.856	0.26	31.67	4.06	0.06	31.928	32.044	0.08	31.99	4.69	0.0388				0.646625	-0.628999	0.24515
64		>bta-miR-6521 MIMAT0025539	GUGGCGCCAGCUCUGAGCAGAGU	28.471	28.495	0.02	28.48	0.87	0.547	28.215	27.853	0.26	28.03	0.74	0.6002				1.09733	0.134	0.13173
64		>bta-miR-2334 MIMAT0011867	ACAGCAGCCUGUGUUCUCACCU	31.473	31.333	0.1	31.4	3.79	0.0723	30.278	30.445	0.12	30.36	3.06	0.1196				1.65462	0.7265	0.01077
64		>bta-miR-148b MIMAT0003814	UCAGUGCAUCACAGAACUUUGU	22.517	22.55	0.02	22.53	-5.08	33.8012	24.025	23.987	0.03	24.01	-3.29	9.7913				0.289674	-1.7875	0.00029
64		>oar-miR-3956-3p MIMAT0019291	UCUGACCUUCCUGCAUCCCGUUC	26.822	26.648	0.12	26.74	-0.88	1.8372	26.967	26.913	0.04	26.94	-0.36	1.2812				0.697372	-0.52	0.15331
64		>bta-miR-2903 MIMAT0013861	UUCCGCGCUCUACGCCAGC	30.869	30.646	0.16	30.76	3.14	0.113	32.231	32.096	0.1	32.16	4.87	0.0343				0.303338	-1.721	0.00848
64		18s		27.621	27.604	0.01	27.61	0	1	27.265	27.33	0.05	27.3	0	1				1	0	0.01118
65		>bta-miR-1343-3p MIMAT0011840	CUCCUGGGGCCCGCACUCUC	35.828	35.827	0	35.83	8.35	0.0031	38.05	37.534	0.36	37.79	10.2	0.0009				0.278066	-1.8465	0.01681
65		>oar-miR-668-5p MIMAT0019310	GUAAGUGCGUCUCGGGUGAGC	25.267	25.256	0.01	25.26	-2.21	4.6396	30.004	Undetermined	#DIV/0!	30	2.41	0.1881				0.0405403	-4.6245	#DIV/0!
65		>bta-miR-142-3p MIMAT0003791	AGUGUUUCCUACUUUAUGGAUG	25.239	25.293	0.04	25.27	-2.21	4.6252	25.214	24.864	0.25	25.04	-2.55	5.8746				1.27015	0.344998	0.32838
65		>oar-miR-494-3p MIMAT0019268	UGAAACAUACACGGGAAACCUCU	Undetermined	26.781	#DIV/0!	26.78	-0.69	1.6183	28.376	28.191	0.13	28.28	0.69	0.6199				0.383022	-1.3845	#DIV/0!
65		>bta-miR-6529b MIMAT0029947	ACUCUGCGCCUCUGAUCUCU	32.879	28.418	3.15	30.65	3.17	0.1109	31.087	31.412	0.23	31.25	3.66	0.0793				0.715488	-0.483001	0.81332
65		>oar-miR-3955-5p MIMAT0019245	UUUGAUGGCUGAUCCUCUCACU	Undetermined	27.38	#DIV/0!	27.38	-0.1	1.0684	27.85	27.899	0.03	27.87	0.28	0.823				0.770303	-0.376502	#DIV/0!
65		>bta-miR-541 MIMAT0009343	UGGUGGGCACAGAAUCCGGCCU	31.981	31.97	0.01	31.98	4.5	0.0442	31.734	31.47	0.19	31.6	4.01	0.0621				1.40591	0.4915	0.10566
65		18s		27.44	27.511	0.05	27.48	0	1	27.592	27.595	0	27.59	0	1				1	0	0.07995
66		>bta-miR-2396 MIMAT0011949	UCAUGCACUGGGGUCUUGAUGG	31.332	30.082	0.88	30.71	3.17	0.1108	27.791	27.896	0.07	27.84	0.75	0.5932				5.35542	2.421	0.04478
66		>bta-miR-30d MIMAT0003533	UGUAAACAUCCCCGACUGGAAGCU	21.291	21.956	0.47	21.62	-5.91	60.0878	20.402	20.381	0.01	20.39	-6.7	103.86				1.72847	0.789499	0.0658
66		>bta-miR-2885 MIMAT0013843	CGGCGGCAGCGCCGGGGCG	25.426	25.625	0.14	25.53	-2.01	4.0195	26.645	26.632	0.01	26.64	-0.45	1.3675				0.340211	-1.5555	0.00793
66		>bta-miR-6524 MIMAT0025553	UUACUCUGAGUAACCUAACUG	Undetermined	Undetermined	#DIV/0!	#DIV/0!	#DIV/0!	#DIV/0!	Undetermined	Undetermined	#DIV/0!	#DIV/0!	#DIV/0!	#DIV/0!				#DIV/0!	#DIV/0!	#DIV/0!
66		>bta-miR-30b-5p MIMAT0003547	UGUAAACAUCCUACACUCAGCU	20.939	20.901	0.03	20.92	-6.61	97.8501	20.41	20.438	0.02	20.42	-6.67	101.547				1.03778	0.0534992	0.00226
66		>bta-miR-628 MIMAT0009356	AUGCUGACAUAUUUACUAGAGG	30.496	30.347	0.11	30.42	2.89	0.135	29.155	29.064	0.06	29.11	2.02	0.2466				1.82703	0.8695	0.0044
66		>bta-miR-2326 MIMAT0011855	CCCCCCUUCCUCUGGAAAAA	27.981	27.981	0	27.98	0.45	0.7328	27.492	27.499	0	27.5	0.41	0.755				1.03025	0.0430002	5e-05
66		18s		27.451	27.614	0.12	27.53	0	1	27.06	27.12	0.04	27.09	0	1				1	0	0.03643
67		>bta-miR-2881 MIMAT0013839	GGGGCGGGGGGGCGGGUG	23.772	23.248	0.37	23.51	-0.59	1.5011	23.011	22.951	0.04	22.98	-6.33	80.6443				53.7242	5.7475	0.18269
67		>bta-miR-2419-3p MIMAT0011986	CAGGCGGGUGCUAAUACGAUCA	38.611	35.329	2.32	35.33	11.23	0.0004	35.238	35.21	0.02	35.22	5.91	0.0166				40.0436	5.3235	0.39881
67		>bta-miR-15a MIMAT0004334	UAGCAGCACAUAAUGGUUUGU	35.775	35.966	0.14	35.87	11.77	0.0003	35.029	34.808	0.16	34.92	5.6	0.0206				72.0288	6.1705	0.02274
67		>bta-miR-448 MIMAT0009319	UUGCAUAUGUAGGAUGUCCCAU	34.009	33.851	0.11	33.93	9.83	0.0011	34.079	33.925	0.11	34	4.69	0.0388				35.4202	5.1465	0.58097
67		>bta-miR-2881 MIMAT0013839	GGGGCGGGGGGGCGGGUG	21.976	21.949	0.02	21.96	-2.13	4.3878	21.947	21.943	0	21.95	-7.37	165.364				37.6871	5.236	0.32831
67		>bta-miR-2403 MIMAT0011960	CUCGGGAAGCUAGCUGGCCUU	31.964	30.767	0.85	31.37	7.27	0.0065	32.577	32.532	0.03	32.55	3.24	0.1058				16.3305	4.0295	0.18553
67		>bta-miR-181b MIMAT0003793	AACAUUCAUUGCUGUCGGUGGGUU	24.153	24.215	0.04	24.18	0.09	0.9408	24.191	24.144	0.03	24.17	-5.15	35.4325				37.661	5.235	0.71271
67		18s		24.112	24.08	0.02	24.1	0	1	29.36	29.269	0.06	29.31	0	1				1	0	9e-05
68		>bta-miR-1307 MIMAT0009969	ACUCGGCGUGGCGUCGGUCGUG	Undetermined	21.174	#DIV/0!	21.17	-6.46	88.1263	22.798	22.942	0.1	22.87	-4.43	21.6006				0.24511	-2.0285	#DIV/0!
68		>oar-miR-299-5p MIMAT0019251	UGGUUUACCGUCCCACAUACAU	27.776	27.663	0.08	27.72	0.08	0.9434	28.459	28.332	0.09	28.4	1.09	0.4689				0.497062	-1.0085	0.01544
68		>bta-miR-2422 MIMAT0011989	UUGAGGGGACUGAGGUGCGGAG	29.823	29.492	0.23	29.66	2.02	0.2462	29.246	29.147	0.07	29.2	1.89	0.2692				1.09316	0.1285	0.1164
68		>bta-miR-2371 MIMAT0011916	UAUAGUUUUGUGUGGUUUUU	32.584	31.985	0.42	32.28	4.65	0.0399	31.518	31.545	0.02	31.53	4.23	0.0533				1.33839	0.4205	0.12863
68		>bta-miR-30b-3p MIMAT0012534	CUGGGAGGUGGAUGUUUACUU	30.501	30.324	0.13	30.41	2.78	0.1459	29.891	29.883	0.01	29.89	2.58	0.1668				1.14314	0.192999	0.02726
68		>oar-miR-376e-3p MIMAT0019278	AACAUAGAGGAAAAUCCACAUU	28.9	28.869	0.02	28.88	1.25	0.4207	31.576	31.629	0.04	31.6	4.3	0.0508				0.1207	-3.0505	0.00013
68		>oar-miR-379-5p MIMAT0019247	UGGUAGACUAUGGAACGUAGGC	27.459	27.458	0	27.46	-0.18	1.1305	26.346	24.842	1.06	26.35	-0.96	1.9413				1.71713	0.779999	0.13137
68		18s		27.642	27.629	0.01	27.64	0	1	27.337	27.269	0.05	27.3	0	1				1	0	0.01067
69		>bta-miR-2361 MIMAT0011899	GUUGUGUUGUUUUUUUUUGU	33.69	33.5	0.13	33.59	6.06	0.015	33.393	33.845	0.32	33.62	6.42	0.0117				0.780515	-0.357502	0.93094
69		>bta-miR-545-3p MIMAT0003807	AUCAACAAACAUUUAUUGUGUG	29.955	29.827	0.09	29.89	2.35	0.1955	30.048	29.632	0.29	29.84	2.64	0.1608				0.822165	-0.2825	0.83652
69		>oar-miR-200b MIMAT0030043	UAAUACUGCCUGGUAAUGAUG	21.291	21.366	0.05	21.33	-6.21	73.9255	21.108	20.99	0.08	21.05	-6.15	71.2096				0.963262	-0.0539999	0.05724
69		>bta-miR-2314 MIMAT0011834	UGCCCAUGAUGACUGCUGACC	30.951	31.143	0.14	31.05	3.51	0.0877	30.275	29.907	0.26	30.09	2.89	0.1351				1.53954	0.6225	0.04404
69		>bta-miR-2325b MIMAT0011927	AGGUUGUUUGGUUUUGUGUU	31.321	30.806	0.36	31.06	3.53	0.0867	30.991	30.538	0.32	30.76	3.56	0.0847				0.97637	-0.0345001	0.47521
69		>oar-miR-369-3p MIMAT0019332	AAUAAUACAUGGUUGAUCUUU	28.322	27.942	0.27	28.13	0.6	0.6618	28.851	28.369	0.34	28.61	1.41	0.3771				0.569789	-0.8115	0.25965
69		>bta-miR-2286 MIMAT0011793	GAAGCAGGGCGGAACGAUGUGU	22.468	22.429	0.03	22.45	-5.09	34.0126	24.672	24.415	0.18	24.54	-2.66	6.3181				0.185758	-2.4285	0.00383
69		18s		27.429	27.644	0.15	27.54	0	1	27.159	27.247	0.06	27.2	0	1				1	0	0.10292
70		>bta-miR-2285o MIMAT0025530	AAACCCGAACGAACUUUUGG	32.476	32.119	0.25	32.3	4.36	0.0488	32.343	32.397	0.04	32.37	4.95	0.0324				0.664805	-0.588998	0.72684
70		>bta-miR-2284b MIMAT0011983	AAAAGUUCGUUUGGUUUUUUC	35.533	35.809	0.2	35.67	7.73	0.0047	36.105	35.9	0.14	36	8.58	0.0026				0.555554	-0.848001	0.1936
70		>bta-miR-134 MIMAT0009227	UGUGACUGGUUGACCAGAGUGG	29.719	29.874	0.11	29.8	1.86	0.276	30.227	30.209	0.01	30.22	2.79	0.1441				0.521956	-0.937999	0.0326
70		>bta-let-7a-3p MIMAT0004330	CUAUACAAUCUACUGUCUUUC	27.438	27.321	0.08	27.38	-0.56	1.4743	27.696	27.669	0.02	27.68	0.26	0.8354				0.566638	-0.8195	0.03709
70		>bta-miR-2301 MIMAT0011812	GUGGUUUUGGUUUCCCUCUU	34.208	34.363	0.11	34.29	6.35	0.0123	33.468	33.486	0.01	33.48	6.05	0.0151				1.22434	0.292001	0.00918
70		>bta-miR-2289 MIMAT0011796	UCGUGUUCGAGCUCGCGUCC	31.644	31.45	0.14	31.55	3.61	0.082	33.227	33.136	0.06	33.18	5.76	0.0185				0.225156	-2.151	0.00427
70		>bta-miR-2350 MIMAT0011886	CAGCUCCUGUUUCUCUCCUCAG	33.185	33.187	0	33.19	5.25	0.0263	32.253	32.452	0.14	32.35	4.93	0.0328				1.24574	0.317002	0.01395
70		18s		27.994	27.885	0.08	27.94	0	1	27.413	27.433	0.01	27.42	0	1				1	0	0.01131
71		>bta-miR-1814b MIMAT0011908	AGAUUGUUUAGUUUUGUUUG	33.993	32.433	1.1	33.21	8.88	0.0021	34.122	34.862	0.52	34.49	4.91	0.0333				15.7142	3.974	0.27665
71		>oar-miR-3956-5p MIMAT0019290	GUACGUGGAUGCUGAAGGUCAGA	28.996	28.931	0.05	28.96	4.63	0.0404	29.981	29.843	0.1	29.91	0.33	0.7975				19.7598	4.3045	0.0064
71		>bta-miR-450a MIMAT0003834	UUUUGCGAUGUGUUCCUAAUAU	26.688	26.554	0.09	26.62	2.29	0.2047	26.668	26.651	0.01	26.66	-2.93	7.6				37.1297	5.2145	0.62615
71		>bta-miR-551b MIMAT0009348	GGCGACCCAUACUUGGUUUCAG	29.546	Undetermined	#DIV/0!	29.55	5.21	0.027	Undetermined	Undetermined	#DIV/0!	#DIV/0!	#DIV/0!	#DIV/0!				#DIV/0!	#DIV/0!	#DIV/0!
71		>bta-miR-2379 MIMAT0011925	AGGCUGCUGGAGAAGAUAUUUU	30.037	29.983	0.04	30.01	5.68	0.0195	29.975	30.28	0.22	30.13	0.54	0.6868				35.1511	5.1355	0.52726
71		>bta-miR-149-3p MIMAT0024571	GAGGGAGGGACGGGGGCUGUGC	21.665	22.019	0.25	21.84	-2.49	5.6197	24.276	24.319	0.03	24.3	-5.29	39.0703				6.95235	2.7975	0.00523
71		>bta-miR-1814c MIMAT0011984	GUUUUGUUUGGGUUUGUUUU	32.748	32.324	0.3	32.54	8.2	0.0034	32.858	32.95	0.07	32.9	3.32	0.1002				29.5482	4.885	0.2319
71		18s		24.33	24.335	0	24.33	0	1	29.569	29.602	0.02	29.59	0	1				1	0	1e-05
72		>bta-miR-200c MIMAT0003823	UAAUACUGCCGGGUAAUGAUGGA	20.712	21.158	0.32	20.94	-7.13	140.507	21.614	22.115	0.35	21.86	-5.98	63.0096				0.448444	-1.157	0.10926
72		>bta-miR-449a MIMAT0009320	UGGCAGUGUAUUGUUAGCUGGU	32.254	31.986	0.19	32.12	4.05	0.0604	32.637	32.403	0.17	32.52	4.68	0.0391				0.647297	-0.6275	0.1535
72		>bta-miR-2399-3p MIMAT0011955	UUCUAACAACUACAGAAAGUGU	36.94	36.893	0.03	36.92	8.85	0.0022	34.435	34.036	0.28	34.24	6.39	0.0119				5.47743	2.4535	0.00557
72		>bta-miR-2285b MIMAT0011833	AAAAUCUGAGUGAACUUUUUGG	34.91	34.53	0.27	34.72	6.65	0.01	33.601	32.576	0.72	33.09	5.25	0.0263				2.64634	1.404	0.0963
72		>bta-miR-2460 MIMAT0012045	UGGAGCUCUUGAGGCCUGGCAU	31.261	31.174	0.06	31.22	3.15	0.1128	32.323	32.272	0.04	32.3	4.46	0.0456				0.40402	-1.3075	0.00217
72		>bta-miR-2369 MIMAT0011913	GUAGGUUGUGGGUUUUUGUUU	29.589	29.952	0.26	29.77	1.7	0.3076	30.931	30.624	0.22	30.78	2.94	0.1307				0.42499	-1.2345	0.05146
72		>bta-miR-2450c MIMAT0012028	CACGUCAGUAGAGGCGCGUGUG	30.959	30.896	0.04	30.93	2.86	0.1379	32.111	32.367	0.18	32.24	4.4	0.0475				0.344124	-1.539	0.00995
72		18s		28.073	28.066	0	28.07	0	1	27.937	27.747	0.13	27.84	0	1				1	0	0.13909
73		>bta-miR-2318 MIMAT0011841	GUGUAUGAUGAAUUAUCUGACC	31.942	31.857	0.06	31.9	5.31	0.0253	33.862	34.056	0.14	33.96	6.98	0.0079				0.312949	-1.676	0.00263
73		>bta-miR-371 MIMAT0009301	AAGUGCCGCCAUGUUUUGAGUGU	36.198	35.841	0.25	36.02	9.43	0.0015	34.865	35.212	0.25	35.04	8.06	0.0037				2.57487	1.3645	0.05877
73		>bta-miR-345-3p MIMAT0012535	CCUGAACUAGGGGUCUGGAG	30.993	30.421	0.4	30.71	4.11	0.0578	30.988	31.235	0.17	31.11	4.13	0.057				0.985549	-0.0210009	0.32368
73		>bta-miR-6519 MIMAT0025537	UAGCAGCGGGAACAGAGAAA	34.821	29.924	3.46	29.92	3.33	0.0994	28.992	28.908	0.06	28.95	1.97	0.2548				2.56241	1.3575	0.29709
73		>bta-miR-133b MIMAT0009226	UUUGGUCCCCUUCAACCAGCUA	25.894	25.659	0.17	25.78	-0.82	1.7623	25.596	25.542	0.04	25.57	-1.41	2.6546				1.50629	0.591	0.22737
73		>bta-miR-137 MIMAT0009231	UUAUUGCUUAAGAAUACGCGUAG	39.232	39.036	0.14	39.13	12.54	0.0002	35.577	36.331	0.53	35.95	8.98	0.002				11.8228	3.5635	0.01468
73		>bta-miR-383 MIMAT0009309	AGAUCAGAAGGUGAUUGUGGCU	36.775	35.735	0.74	36.26	9.66	0.0012	34.729	34.101	0.44	34.42	7.44	0.0058				4.67025	2.2235	0.09389
73		18s		26.609	26.579	0.02	26.59	0	1	26.71	27.245	0.38	26.98	0	1				1	0	0.28864
74		>bta-miR-6536 MIMAT0025572	UUUAAGUAUACGAUGAACUGC	37.41	Undetermined	#DIV/0!	37.41	10.86	0.0005	37.953	Undetermined	#DIV/0!	37.95	11.28	0.0004				0.748202	-0.4185	#DIV/0!
74		>oar-miR-3959-3p MIMAT0019303	UGUAUGUCAACUGAUCCACAGU	29.019	28.894	0.09	28.96	2.41	0.1882	28.341	28.183	0.11	28.26	1.59	0.3321				1.76418	0.818998	0.0204
74		>bta-miR-2471-3p MIMAT0012062	UCUGAUGAAGACAGCCCUGCU	32.927	33.263	0.24	33.09	6.55	0.0107	31.996	32.074	0.06	32.04	5.36	0.0243				2.27284	1.1845	0.02547
74		>bta-miR-124b MIMAT0013774	UAAGGCACGCGGUGAAUGCCAAG	33.506	33.417	0.06	33.46	6.91	0.0083	33.045	32.947	0.07	33	6.32	0.0125				1.50525	0.590001	0.01963
74		>bta-miR-2426 MIMAT0011996	AAGGAAGUGGCUUGGGGAAAG	32.485	32.523	0.03	32.5	5.96	0.0161	30.591	30.574	0.01	30.58	3.91	0.0665				4.12959	2.046	0.00012
74		>bta-miR-2306 MIMAT0011818	CAGGCCUGCCCAUCUAGGACAC	Undetermined	Undetermined	#DIV/0!	#DIV/0!	#DIV/0!	#DIV/0!	Undetermined	Undetermined	#DIV/0!	#DIV/0!	#DIV/0!	#DIV/0!				#DIV/0!	#DIV/0!	#DIV/0!
74		>bta-miR-2285k MIMAT0024586	AAAACCGGAAUGAACUUUUUG	34.021	33.459	0.4	33.74	7.19	0.0068	32.73	32.707	0.02	32.72	6.05	0.0151				2.21299	1.146	0.06814
74		18s		26.789	26.305	0.34	26.55	0	1	26.46	26.883	0.3	26.67	0	1				1	0	0.73582
75		>bta-miR-224 MIMAT0009271	CAAGUCACUAGUGGUUCCGUUUA	25.27	25.114	0.11	25.19	-1.58	2.9918	25.054	24.912	0.1	24.98	-2.04	4.1153				1.37554	0.46	0.18604
75		>bta-miR-1256 MIMAT0009960	AGGCAUUGACUUCUCUCUAGAU	34.899	34.661	0.17	34.78	8.01	0.0039	32.391	32.43	0.03	32.41	5.39	0.0239				6.14963	2.6205	0.00258
75		>bta-miR-6532 MIMAT0025568	AGUGCGGACAGGAAAGACGGUUU	24.186	24.315	0.09	24.25	-2.52	5.7458	23.761	23.907	0.1	23.83	-3.19	9.1261				1.58832	0.667501	0.05059
75		>bta-miR-130a MIMAT0009223	CAGUGCAAUGUUAAAAGGGCAU	26.136	26.256	0.08	26.2	-0.58	1.4917	25.731	25.516	0.15	25.62	-1.4	2.6399				1.76969	0.8235	0.04326
75		>bta-miR-2428 MIMAT0011998	UGGCUGGAGUGCGGCGGAGGU	30.232	30.407	0.12	30.32	3.55	0.0856	29.266	29.014	0.18	29.14	2.12	0.2307				2.6954	1.4305	0.0165
75		>bta-miR-29d-3p MIMAT0009275	UAGCACCAUUUGAAAUCGAUUA	21.067	21.34	0.19	21.2	-5.57	47.4883	20.158	20.3	0.1	20.23	-6.8	111.045				2.33836	1.2255	0.02403
75		>bta-miR-767 MIMAT0009375	UGCACCAUGGUUGUCUGAGCAUG	31.461	31.534	0.05	31.5	4.72	0.0378	30.433	30.175	0.18	30.3	3.28	0.1029				2.72169	1.4445	0.01238
75		18s		26.861	26.685	0.12	26.77	0	1	26.899	27.149	0.18	27.02	0	1				1	0	0.24231
76		>bta-miR-6530 MIMAT0025566	CGCGGAGGAAGGUAAGACGG	34.402	34.138	0.19	34.27	7.36	0.0061	33.475	33.705	0.16	33.59	6.29	0.0128				2.1038	1.073	0.06035
76		>bta-miR-2449 MIMAT0012027	UGGGCAGGAGACAGCAGGGC	30.071	30.141	0.05	30.11	3.2	0.1089	27.685	27.628	0.04	27.66	0.36	0.7813				7.17262	2.8425	0.00034
76		>bta-miR-208b MIMAT0009262	AUAAGACGAACAAAAGGUUUGU	36.391	36.192	0.14	36.29	9.38	0.0015	34.958	35.056	0.07	35.01	7.71	0.0048				3.19873	1.6775	0.00737
76		>bta-miR-2362 MIMAT0011900	CACUGUGAUGGAGCGUUCUGACC	32.316	32.509	0.14	32.41	5.51	0.022	30.706	30.537	0.12	30.62	3.32	0.1001				4.54412	2.184	0.00509
76		>oar-miR-200a MIMAT0030042	AACACUGUCUGGUAACGAU	25.1	25.216	0.08	25.16	-1.75	3.3624	26.842	26.281	0.4	26.56	-0.74	1.669				0.496374	-1.0105	0.03922
76		>oar-miR-493-3p MIMAT0019238	UGAAGGUCUACUGUGUGCCAGG	30.489	30.438	0.04	30.46	3.56	0.085	28.989	29.768	0.55	29.38	2.08	0.2368				2.78562	1.478	0.10872
76		>bta-miR-449d MIMAT0011962	GAAGGCUGUGUGCUGUGGAG	30.853	30.449	0.29	30.65	3.74	0.0747	28.931	29.097	0.12	29.01	1.71	0.3049				4.08405	2.03	0.01734
76		18s		27.096	26.719	0.27	26.91	0	1	26.888	27.713	0.58	27.3	0	1				1	0	0.47754
77		>bta-miR-2284aa MIMAT0025560	AAAAAAGUUUGUUUGGGUUUU	34.934	34.621	0.22	34.78	7.64	0.005	33.577	33.869	0.21	33.72	7.01	0.0077				1.54596	0.628499	0.03881
77		>bta-miR-2285j MIMAT0024585	AAAAACCAGAACGAACUUUUUG	33.932	33.973	0.03	33.95	6.82	0.0089	33.187	33.363	0.12	33.27	6.57	0.0105				1.19044	0.2515	0.01733
77		>bta-miR-545-5p MIMAT0003806	UCAGUAAAUGUUUAUUGGAUG	31.756	32.09	0.24	31.92	4.79	0.0362	30.89	30.655	0.17	30.77	4.06	0.0598				1.65233	0.724501	0.03009
77		>oar-miR-134-5p MIMAT0019308	UGUGACUGGUUGACCAGAGGG	33.166	32.709	0.32	32.94	5.8	0.0179	31.854	39.048	5.09	31.85	5.15	0.0282				1.57735	0.6575	0.55773
77		>oar-miR-376c-3p MIMAT0019280	AACAUAGAGGAAAUUCCACGU	27.057	27.259	0.14	27.16	0.02	0.9835	27.753	27.854	0.07	27.8	1.1	0.468				0.475824	-1.0715	0.02927
77		>oar-miR-1185-3p MIMAT0019289	AUAUACAGAGGGAGACUCUUAU	31.313	31.326	0.01	31.32	4.19	0.055	32.352	32.35	0	32.35	5.64	0.02				0.364124	-1.4575	4e-05
77		>bta-miR-2351 MIMAT0011887	AUAGUUAUUGUAUUGUGUUU	37.122	37.588	0.33	37.36	10.22	0.0008	38.675	39.747	0.76	39.21	12.5	0.0002				0.205613	-2.282	0.08649
77		18s		27.239	27.029	0.15	27.13	0	1	26.483	26.933	0.32	26.71	0	1				1	0	0.22835
78		>bta-miR-2459 MIMAT0012044	GCCAGAUGAUGGGAGCUGAUU	29.098	29.277	0.13	29.19	1.67	0.3147	30.029	30.262	0.16	30.15	3.29	0.1023				0.324998	-1.6215	0.02272
78		>bta-miR-1291 MIMAT0009956	UGGCCCUGACUGAAGACCUGCAGU	25.341	25.369	0.02	25.35	-2.16	4.4831	26.544	26.395	0.11	26.47	-0.39	1.3072				0.291587	-1.778	0.00459
78		>bta-miR-2330-5p MIMAT0011861	UGGGCUUGGGCAGUGAGGACUGG	31.235	31.463	0.16	31.35	3.83	0.0703	29.12	29.49	0.26	29.31	2.45	0.1831				2.60359	1.3805	0.01111
78		>bta-miR-670 MIMAT0009364	UCCCUGAGUAUAUGUGGUGAA	35.982	39.296	2.34	35.98	8.46	0.0028	35.666	36.555	0.63	35.67	8.81	0.0022				0.785944	-0.347502	0.46696
78		>bta-miR-105a MIMAT0009217	UCAAAUGCUCAGACUCCUGUGGU	32.424	32.543	0.08	32.48	4.96	0.032	30.844	30.843	0	30.84	3.99	0.063				1.96769	0.9765	0.00131
78		>bta-miR-1434-3p MIMAT0012040	GAAGAAAUCUAAGGUCUGAGG	27.167	27.346	0.13	27.26	-0.26	1.2	26.149	26.155	0	26.15	-0.7	1.629				1.35754	0.441	0.00651
78		>bta-miR-2284ab MIMAT0030437	UAAAAGUUUGGUUGGGUUUUU	32.846	32.958	0.08	32.9	5.38	0.024	32.432	32.5	0.05	32.47	5.61	0.0205				0.854114	-0.227499	0.02184
78		18s		27.74	27.299	0.31	27.52	0	1	26.627	27.085	0.32	26.86	0	1				1	0	0.17215
79		>oar-miR-485-5p MIMAT0019312	AGAGGCUGGCCGUGAUGAAUUCG	27.069	27.991	0.65	27.53	0.77	0.5872	29.625	27.981	1.16	28.8	2.08	0.2364				0.402622	-1.3125	0.30931
79		>bta-miR-302c MIMAT0009281	UAAGUGCUUCCAUGUUUCAGUGG	33.976	33.884	0.07	33.93	7.17	0.007	35.362	35.468	0.07	35.41	8.69	0.0024				0.3476	-1.5245	0.00223
79		>bta-miR-22-5p MIMAT0003826	AGUUCUUCAGUGGCAAGCUUUA	30.73	25.3	3.84	25.3	-1.46	2.7549	25.652	25.535	0.08	25.59	-1.13	2.1871				0.793883	-0.333001	0.46665
79		>bta-miR-2917 MIMAT0012885	AUGACUGACAUGGACU	38.822	37.777	0.74	38.3	11.54	0.0003	37.811	37.78	0.02	37.8	11.07	0.0005				1.37984	0.464499	0.43669
79		>bta-miR-2381 MIMAT0011929	CAGGCUGCUCUGUGCUUGGCU	28.638	28.541	0.07	28.59	1.83	0.2818	27.878	28.145	0.19	28.01	1.29	0.4092				1.45246	0.5385	0.05542
79		>bta-miR-2883 MIMAT0013841	CUUCCCGUGUGUUGAGCC	33.552	33.345	0.15	33.45	6.69	0.0097	33.125	33.382	0.18	33.25	6.53	0.0108				1.11381	0.155499	0.35875
79		>oar-miR-323b MIMAT0019314	CCCAAUACACGGUCGAUCUCU	29.578	29.568	0.01	29.57	2.81	0.1425	32.897	32.733	0.12	32.82	6.09	0.0147				0.102842	-3.2815	0.00064
79		18s		26.819	26.705	0.08	26.76	0	1	26.725	26.72	0	26.72	0	1				1	0	0.56032
80		>oar-miR-30a-3p MIMAT0030056	CUUUCAGUCGGAUGUUUGCAG	26.177	26.093	0.06	26.14	-1.13	2.1863	Undetermined	25.638	#DIV/0!	25.64	-1.37	2.5784				1.17936	0.238	#DIV/0!
80		>bta-miR-144 MIMAT0009234	UACAGUAUAGAUGAUGUACUAG	30.073	29.849	0.16	29.96	2.7	0.1542	Undetermined	34.853	#DIV/0!	34.85	7.85	0.0043				0.0281446	-5.151	#DIV/0!
80		>bta-miR-6121-5p MIMAT0024592	UCGGAGCGCCCUCGCCAGAC	25.326	25.392	0.05	25.36	-1.9	3.7438	Undetermined	27.41	#DIV/0!	27.41	0.41	0.755				0.201661	-2.31	#DIV/0!
80		>oar-miR-154a-3p MIMAT0019316	AAUCAUACACGGUUCACCUAUU	31.231	31.436	0.14	31.33	4.07	0.0595	Undetermined	32.584	#DIV/0!	32.58	5.58	0.0209				0.351233	-1.5095	#DIV/0!
80		>oar-miR-411a-3p MIMAT0019250	UAUGUAACACGGUCCACUAAC	29.563	Undetermined	#DIV/0!	29.56	2.3	0.2031	Undetermined	29.951	#DIV/0!	29.95	2.95	0.1297				0.638607	-0.647	#DIV/0!
80		>oar-miR-323a-3p MIMAT0019260	CACAUUACACGGUCGACCUCU	29.893	30.028	0.1	29.96	2.7	0.1542	Undetermined	32.664	#DIV/0!	32.66	5.66	0.0198				0.128292	-2.9625	#DIV/0!
80		>bta-miR-2896 MIMAT0013854	CGGCAGAUGAAGUCCAUC	26.282	26.282	0	26.28	-0.98	1.9745	Undetermined	27.252	#DIV/0!	27.25	0.25	0.8424				0.426613	-1.229	#DIV/0!
80		18s		27.232	27.295	0.04	27.26	0	1	26.981	27.028	0.03	27	0	1				1	0	0.02226
81		>bta-miR-3431 MIMAT0017394	CCUCAGUCAGCCUUGUGGAUGU	26.032	25.904	0.09	25.97	-1.1	2.1473	26.113	26.08	0.02	26.1	-1.25	2.3743				1.10573	0.145	0.19131
81		>oar-miR-654-3p MIMAT0019283	UAUGUCUGCUGACCAUCACCUUUA	27.676	27.408	0.19	27.54	0.47	0.7212	28.975	28.865	0.08	28.92	1.58	0.3354				0.465064	-1.1045	0.01087
81		>bta-miR-23b-5p MIMAT0012538	GGGUUCCUGGCAUGCUGAUUU	Undetermined	Undetermined	#DIV/0!	#DIV/0!	#DIV/0!	#DIV/0!	Undetermined	Undetermined	#DIV/0!	#DIV/0!	#DIV/0!	#DIV/0!				#DIV/0!	#DIV/0!	#DIV/0!
81		>bta-miR-488 MIMAT0009330	UUGAAAGGCUGUUUCUUGGUC	32.366	32.098	0.19	32.23	5.16	0.0279	33.788	32.848	0.66	33.32	5.97	0.0159				0.569395	-0.812498	0.15637
81		>bta-miR-1179 MIMAT0009957	AAGCAUUCUUUCAUUGGUUGG	38.81	39.21	0.28	39.01	11.94	0.0003	38.608	37.597	0.71	38.1	10.76	0.0006				2.26734	1.181	0.237
81		>bta-miR-379 MIMAT0009306	UGGUAGACUAUGGAACGUAGG	26.489	26.367	0.09	26.43	-0.64	1.561	26.299	26.17	0.09	26.23	-1.11	2.1577				1.38223	0.467001	0.16111
81		>bta-miR-205 MIMAT0003545	UCCUUCAUUCCACCGGAGUCUG	21.648	21.664	0.01	21.66	-5.41	42.6508	21.947	21.963	0.01	21.95	-5.39	41.9035				0.98248	-0.0254993	0.00143
81		18s		27.039	27.102	0.04	27.07	0	1	27.301	27.387	0.06	27.34	0	1				1	0	0.03595
82		>bta-miR-2284j MIMAT0011827	GAAAAGUUCGUUCAGGUUUU	32.213	32.18	0.02	32.2	4.87	0.0342	34.252	34.976	0.51	34.61	6.63	0.0101				0.295453	-1.759	0.02174
82		>oar-miR-329b-5p MIMAT0019263	GAGGUUUUCUGGGUUUCUGUUUC	33.729	32.809	0.65	32.81	5.48	0.0224	35.001	34.549	0.32	34.77	6.79	0.009				0.40402	-1.3075	0.09893
82		>bta-miR-127 MIMAT0003787	UCGGAUCCGUCUGAGCUUGGCU	24.7	24.543	0.11	24.62	-2.71	6.5274	26.567	26.504	0.04	26.54	-1.45	2.734				0.418849	-1.2555	0.00195
82		>bta-miR-3613a MIMAT0024574	UGUUGUACUUUUUUUUUUGUUC	30.078	29.65	0.3	29.86	2.54	0.1724	33.039	32.877	0.11	32.96	4.97	0.0319				0.184859	-2.4355	0.00542
82		>bta-miR-2305 MIMAT0011817	CGGGGGUGGCGGGGAGGGGG	21.702	21.674	0.02	21.69	-5.64	49.8665	22.395	22.34	0.04	22.37	-5.62	49.1459				0.985549	-0.0209999	0.00206
82		>bta-miR-376b MIMAT0009945	AUCAUAGAGGAAAAUCCAUGUU	26.897	26.515	0.27	26.71	-0.62	1.539	31.277	31.679	0.28	31.48	3.49	0.0889				0.0577714	-4.1135	0.00336
82		>bta-miR-2902 MIMAT0013860	GUGGCUGUCCCUGGAGGUGGG	32.35	31.184	0.82	31.77	4.44	0.0461	31.825	Undetermined	#DIV/0!	31.83	3.84	0.0699				1.51624	0.600499	#DIV/0!
82		18s		27.348	27.308	0.03	27.33	0	1	27.926	28.047	0.09	27.99	0	1				1	0	0.00923
83		>bta-miR-2284e MIMAT0012080	AAGUUCGUUCGGAUUUUUCC	36.426	36.514	0.06	36.47	10.01	0.001	Undetermined	Undetermined	#DIV/0!	#DIV/0!	#DIV/0!	#DIV/0!				#DIV/0!	#DIV/0!	#DIV/0!
83		>bta-miR-2405 MIMAT0011963	UGUGUGGUUUGUUUGGCCUC	28.952	28.908	0.03	28.93	2.47	0.1809	33.466	33.101	0.26	33.28	5.12	0.0287				0.158824	-2.6545	0.00178
83		>bta-miR-124a MIMAT0003811	UAAGGCACGCGGUGAAUGCCAAG	30.798	30.287	0.36	30.54	4.08	0.0592	33.864	33.827	0.03	33.85	5.68	0.0195				0.328964	-1.604	0.00596
83		>bta-miR-499 MIMAT0003536	UUAAGACUUGCAGUGAUGUUU	26.445	26.309	0.1	26.38	-0.09	1.0618	29.847	29.649	0.14	29.75	1.59	0.3332				0.313818	-1.672	0.00127
83		>bta-miR-2285c MIMAT0011950	AAACCUGAACAAACUUUUUGGC	31.262	30.774	0.35	31.02	4.55	0.0426	35.809	35.545	0.19	35.68	7.51	0.0055				0.128514	-2.96	0.00353
83		>bta-miR-2335 MIMAT0011868	AGAUAAUGAUGACUAACUGAAU	28.736	28.999	0.19	28.87	2.4	0.1889	36.004	34.815	0.84	35.41	7.25	0.0066				0.0348427	-4.843	0.00855
83		>bta-miR-3154 MIMAT0025529	CAGAAGGGGAGUCGGAGCAGA	23.456	23.433	0.02	23.44	-3.02	8.1061	27.794	27.629	0.12	27.71	-0.45	1.367				0.168638	-2.568	0.00038
83		18s		26.461	26.466	0	26.46	0	1	28.111	28.214	0.07	28.16	0	1				1	0	0.00092
84		>bta-miR-2377 MIMAT0011923	ACUGCACAGACCUAGGCUCU	36.436	34.982	1.03	34.98	7.97	0.004	37.21	37.674	0.33	37.44	8.69	0.0024				0.60395	-0.7275	0.15114
84		>bta-miR-2285e MIMAT0024580	AAACCUGAACGAACUUUUUGGC	32.27	32.009	0.18	32.14	5.12	0.0287	35.735	35.573	0.11	35.65	6.91	0.0083				0.29078	-1.782	0.0019
84		>bta-miR-29a MIMAT0003518	CUAGCACCAUCUGAAAUCGGUUA	20.151	20.05	0.07	20.1	-6.91	120.635	20.664	20.421	0.17	20.54	-8.21	295.088				2.44613	1.2905	0.07834
84		>bta-miR-2887 MIMAT0013845	CGGGACCGGGGUCCGGUGCG	23.006	22.985	0.01	23	-4.02	16.2177	24.673	24.706	0.02	24.69	-4.06	16.6564				1.02705	0.0385017	0.00013
84		>oar-miR-143 MIMAT0030032	UGAGAUGAAGCACUGUAGCUC	18.86	18.585	0.19	18.72	-8.29	313.539	19.429	19.424	0	19.43	-9.32	639.588				2.0399	1.0285	0.03611
84		>bta-miR-16a MIMAT0009242	UAGCAGCACGUAAAUAUUGGUG	20.45	20.548	0.07	20.5	-6.52	91.519	19.656	19.522	0.09	19.59	-9.16	571.457				6.24414	2.6425	0.00822
84		>bta-miR-328 MIMAT0009287	CUGGCCCUCUCUGCCCUUCCGU	26.99	27.244	0.18	27.12	0.1	0.9317	Undetermined	Undetermined	#DIV/0!	#DIV/0!	#DIV/0!	#DIV/0!				#DIV/0!	#DIV/0!	#DIV/0!
84		18s		26.98	27.05	0.05	27.01	0	1	28.621	28.874	0.18	28.75	0	1				1	0	0.00569
85		>bta-miR-129-3p MIMAT0009222	AAGCCCUUACCCCAAAAAGCAU	28.89	29.206	0.22	29.05	2.63	0.1614	29.706	29.703	0	29.7	3.41	0.0942				0.583579	-0.776999	0.05334
85		>bta-miR-219-5p MIMAT0009269	UGAUUGUCCAAACGCAAUUCUU	29.507	29.893	0.27	29.7	3.28	0.1027	32.982	32.93	0.04	32.96	6.66	0.0099				0.0962881	-3.3765	0.00356
85		>bta-miR-2302 MIMAT0011813	GGAGCGGGUGCAGGACCCCGG	28.149	27.828	0.23	27.99	1.57	0.3365	28.473	28.544	0.05	28.51	2.21	0.2158				0.641491	-0.6405	0.08707
85		>bta-miR-2285ae MIMAT0030448	AGAAAGUUCAUUUAGGUUUUUC	35.674	35.936	0.19	35.81	9.39	0.0015	33.343	33.412	0.05	33.38	7.08	0.0074				4.94854	2.307	0.0031
85		>bta-miR-539 MIMAT0009342	GGAGAAAUUAUCCUUGGUGUGU	33.565	33.867	0.21	33.72	7.3	0.0064	33.499	33.768	0.19	33.63	7.34	0.0062				0.974004	-0.0380011	0.72282
85		>bta-miR-2418 MIMAT0011982	UGGGAUGAGUGUGGCGUGGUCG	30.112	30.089	0.02	30.1	3.68	0.0778	29.595	29.505	0.06	29.55	3.25	0.1049				1.34723	0.430001	0.00704
85		>oar-miR-487a-3p MIMAT0019305	AUCAUACAGGGACAUCCAGUUU	31.741	31.211	0.37	31.48	5.06	0.03	31.992	32.029	0.03	32.01	5.71	0.0191				0.635076	-0.655	0.18187
85		18s		26.46	26.374	0.06	26.42	0	1	26.288	26.305	0.01	26.3	0	1				1	0	0.11076
86		>bta-miR-6535 MIMAT0025571	UAGGGGGAGCGGUUGGAGGACU	25.419	25.466	0.03	25.44	0.61	0.655	25.5	25.525	0.02	25.51	-4.03	16.291				24.8729	4.6365	0.11927
86		>bta-miR-454 MIMAT0009326	UAGUGCAAUAUUGCUUAUAGGGU	31.255	31.346	0.06	31.3	6.47	0.0113	28.537	28.523	0.01	28.53	-1.01	2.0118				178.156	7.477	0.00028
86		>bta-miR-664a MIMAT0012078	CAGGCUGGGGUGUGUGUGGAUG	26.065	26.05	0.01	26.06	1.23	0.4276	26.22	26.142	0.06	26.18	-3.36	10.2496				23.9674	4.583	0.08971
86		>bta-miR-2312 MIMAT0011828	AAAACCUGAACGAACUUUUC	35.666	35.822	0.11	35.74	10.91	0.0005	33.492	34.109	0.44	33.8	4.26	0.0521				100.427	6.65	0.02578
86		>oar-let-7c MIMAT0014964	UGAGGUAGUAGGUUGUAUGGUU	19.533	19.537	0	19.54	-5.3	39.3148	18.315	18.333	0.01	18.32	-11.21	2376.3				60.4429	5.9175	6e-05
86		>bta-miR-503-3p MIMAT0025558	GGAGUAUUGUUUCUGCUGCCCGG	30.651	31.15	0.35	30.9	6.07	0.0149	29.641	29.544	0.07	29.59	0.05	0.9633				64.6464	6.0145	0.03575
86		>bta-miR-2364 MIMAT0011902	UCUCUGUGGAUGGAUGUGGGCAG	29.009	29.251	0.17	29.13	4.3	0.0508	27.333	27.594	0.18	27.46	-2.07	4.2134				82.8828	6.373	0.01121
86		18s		24.805	24.859	0.04	24.83	0	1	29.342	29.735	0.28	29.54	0	1				1	0	0.00177
87		>bta-miR-664b MIMAT0030438	UAUUCAUUUAUCUCCCAGCCUAC	25.101	25.506	0.29	25.3	-1.07	2.0951	23.879	23.942	0.04	23.91	-2.48	5.5693				2.6583	1.4105	0.02097
87		>oar-let-7g MIMAT0030025	UGAGGUAGUAGUUUGUACAGU	20.442	20.444	0	20.44	-5.93	60.8633	19.447	19.445	0	19.45	-6.94	122.956				2.0202	1.0145	0
87		>bta-miR-2300a-5p MIMAT0011809	UCCUCAGCUAGUUUUGUCUCCC	34.133	33.757	0.27	33.94	7.57	0.0052	32.661	32.301	0.25	32.48	6.09	0.0146				2.79239	1.4815	0.03018
87		>bta-miR-2325a MIMAT0011854	GUUUUGUUUGGGUUUUUUUC	32.876	32.747	0.09	32.81	6.44	0.0115	32.174	32.06	0.08	32.12	5.73	0.0189				1.63807	0.712001	0.01502
87		>bta-miR-21-5p MIMAT0003528	UAGCUUAUCAGACUGAUGUUGACU	21.047	21.295	0.18	21.17	-5.2	36.7456	18.88	18.891	0.01	18.89	-7.5	181.333				4.93483	2.303	0.00294
87		>oar-miR-380-3p MIMAT0019254	UAUGUAAUGUGGUCCACGUCU	27.731	27.858	0.09	27.79	1.42	0.3727	27.699	27.512	0.13	27.61	1.22	0.43				1.15389	0.206502	0.23645
87		>bta-miR-2404 MIMAT0011961	UUGCACUGCAUGGUAUCUGC	23.181	23.26	0.06	23.22	-3.15	8.8766	21.925	21.974	0.03	21.95	-4.44	21.6831				2.44274	1.2885	0.00133
87		18s		26.314	26.427	0.08	26.37	0	1	26.346	26.43	0.06	26.39	0	1				1	0	0.82688
88		>bta-miR-1251 MIMAT0009963	ACUCUAGCUGCCAAAGGCGCU	29.498	29.699	0.14	29.6	3.17	0.1113	30.798	30.976	0.13	30.89	4.51	0.0438				0.394063	-1.3435	0.01068
88		>bta-miR-150 MIMAT0003845	UCUCCCAACCCUUGUACCAGUGU	23.745	23.508	0.17	23.63	-2.8	6.9837	20.391	20.377	0.01	20.38	-5.99	63.624				9.1103	3.1875	0.00134
88		>bta-miR-2303 MIMAT0011814	UCUGAAUGAUGUCGACUGAUG	29.248	28.999	0.18	29.12	2.69	0.1546	29.531	29.896	0.26	29.71	3.34	0.0989				0.639493	-0.645	0.11626
88		>bta-miR-1343-5p MIMAT0011839	UGGGGAGCGGCCCCCGGGCGGG	21.973	22.511	0.38	22.24	-4.19	18.2333	23.343	23.326	0.01	23.33	-3.04	8.2306				0.451406	-1.1475	0.05567
88		>bta-miR-2385-5p MIMAT0011935	CUGGGGCAAGUGGAGUACGUU	29.233	28.99	0.17	29.11	2.68	0.1559	28.317	28.272	0.03	28.29	1.92	0.2644				1.69584	0.762	0.02212
88		>oar-miR-758-3p MIMAT0019262	UUUGUGACCUGGUCCACUAA	29.784	30.115	0.23	29.95	3.52	0.0872	30.659	30.384	0.19	30.52	4.15	0.0565				0.647521	-0.627001	0.11715
88		>bta-miR-126-3p MIMAT0003540	CGUACCGUGAGUAAUAAUGCG	20.814	20.661	0.11	20.74	-5.69	51.7326	19.177	19.215	0.03	19.2	-7.18	144.959				2.80208	1.4865	0.0026
88		18s		26.466	26.395	0.05	26.43	0	1	26.364	26.387	0.02	26.38	0	1				1	0	0.27843
89		>oar-miR-376b-3p MIMAT0019285	AUCAUAGAGGAAAAUCCAUGU	26.974	26.983	0.01	26.98	0.39	0.7655	29.439	29.222	0.15	29.33	3.05	0.1207				0.157672	-2.665	0.00212
89		>bta-miR-2469 MIMAT0012059	UUACUGUAGGGCCUGCGGCUU	31.551	31.815	0.19	31.68	5.09	0.0294	31.81	31.359	0.32	31.58	5.3	0.0253				0.861846	-0.214499	0.74243
89		>oar-miR-30b MIMAT0030057	UGUAAACAUCCUACACUCAGC	22.555	21.988	0.4	22.27	-4.32	19.9941	22.326	22.248	0.06	22.29	-3.99	15.9226				0.796365	-0.328499	0.96173
89		>bta-miR-2421 MIMAT0011988	UAUUUUUUUGUUUCGUGUUU	36.552	36.777	0.16	36.66	10.07	0.0009	35.699	36.397	0.49	36.05	9.77	0.0011				1.23413	0.303499	0.23473
89		>bta-miR-2284z MIMAT0025559	AAAAAAGUUUGUUUGGGUUUUU	36.566	35.476	0.77	36.02	9.43	0.0015	34.457	33.581	0.62	34.02	7.74	0.0047				3.22433	1.689	0.1034
89		>bta-miR-451 MIMAT0009323	AAACCGUUACCAUUACUGAGUUU	22.036	21.906	0.09	21.97	-4.62	24.6241	21.719	21.731	0.01	21.73	-4.55	23.5067				0.954621	-0.0670004	0.06375
89		>bta-miR-2284g MIMAT0011847	AAAAGUUCGUUCGGCUUUUU	28.256	27.908	0.25	28.08	1.49	0.3563	28.56	28.475	0.06	28.52	2.24	0.2121				0.595223	-0.748499	0.13559
89		18s		26.567	26.619	0.04	26.59	0	1	26.289	26.271	0.01	26.28	0	1				1	0	0.00764
90		>bta-miR-217 MIMAT0009267	UACUGCAUCAGGAACUGAUUGGAU	33.712	34.129	0.29	33.92	7.13	0.0072	32.817	32.992	0.12	32.9	6.52	0.0109				1.52309	0.607001	0.04613
90		>bta-miR-2450a MIMAT0012030	UGGGCAGUAGAGGUGCAUGUG	Undetermined	33.438	#DIV/0!	33.44	6.64	0.01	31.681	31.511	0.12	31.6	5.21	0.027				2.70008	1.433	#DIV/0!
90		>oar-miR-1193-3p MIMAT0019270	UAGGUCACCCGUUUGACUAUCC	35.804	34.952	0.6	35.38	8.58	0.0026	32.662	33.301	0.45	32.98	6.59	0.0103				3.9655	1.9875	0.04599
90		>bta-miR-2324 MIMAT0011853	UGGGGUUGGGGCAGUGUGGCUGU	30.47	29.311	0.82	29.89	3.1	0.117	29.25	29.724	0.34	29.49	3.1	0.1166				0.996195	-0.00549984	0.58532
90		>bta-miR-409b MIMAT0016935	GGGGUUCACCGAGCAACAUUC	34.332	34.23	0.07	34.28	7.49	0.0056	33.939	33.828	0.08	33.88	7.5	0.0055				0.992062	-0.0114985	0.03413
90		>bta-miR-2322-3p MIMAT0011851	AUGAGGAUGGACUUAGCUUUCG	33.962	33.969	0	33.97	7.17	0.0069	32.269	32.461	0.14	32.36	5.98	0.0159				2.2839	1.1915	0.00358
90		>bta-miR-92a MIMAT0009383	UAUUGCACUUGUCCCGGCCUGU	22.718	22.876	0.11	22.8	-4	15.9834	21.382	21.555	0.12	21.47	-4.92	30.2319				1.89146	0.9195	0.00769
90		18s		26.621	26.97	0.25	26.8	0	1	26.312	26.461	0.11	26.39	0	1				1	0	0.16388
91		>oar-miR-485-3p MIMAT0019313	GUCAUACACGGCUCUCCUCUCU	27.865	27.781	0.06	27.82	2.07	0.2386	26.979	24.933	1.45	25.96	0.28	0.8239				3.45336	1.788	0.2098
91		>bta-miR-2472 MIMAT0012063	UCAGGGUUUGGGAUUCAGGUGC	33.132	32.837	0.21	32.98	7.23	0.0067	30.213	30.311	0.07	30.26	4.59	0.0417				6.24846	2.6435	0.00324
91		>bta-miR-301b MIMAT0009277	CAGUGCAAUGAUAUUGUCAAAGCAU	30.658	30.343	0.22	30.5	4.75	0.0373	31.268	31.553	0.2	31.41	5.73	0.0188				0.503827	-0.988998	0.05039
91		>bta-miR-497 MIMAT0004343	CAGCAGCACACUGUGGUUUGUA	21.841	21.688	0.11	21.76	-3.99	15.9005	23.102	22.964	0.1	23.03	-2.64	6.2485				0.392972	-1.3475	0.00653
91		>bta-miR-19a MIMAT0004336	UGUGCAAAUCUAUGCAAAACUGA	22.629	22.697	0.05	22.66	-3.09	8.5297	23.529	23.48	0.03	23.5	-2.17	4.5065				0.528326	-0.920499	0.00247
91		>oar-miR-329a-3p MIMAT0019266	AACACACCUGGUUAACCUUUUU	27.962	27.986	0.02	27.97	2.22	0.2149	27.377	27.316	0.04	27.35	1.67	0.3143				1.46256	0.5485	0.00272
91		>oar-miR-410-5p MIMAT0019333	CGCCACUUUGGGUACUUGAGGAG	34.636	34.376	0.18	34.51	8.75	0.0023	32.589	32.564	0.02	32.58	6.9	0.0084				3.60625	1.8505	0.00455
91		18s		25.713	25.798	0.06	25.76	0	1	25.659	25.694	0.02	25.68	0	1				1	0	0.22779
92		>bta-miR-1248 MIMAT0009972	ACCUUCUUGUAUAAGCACUGUGCUAAA	22.745	22.804	0.04	22.77	-2.91	7.5214	23.361	23.44	0.06	23.4	-2.21	4.6412				0.617067	-0.6965	0.00615
92		>bta-miR-296-3p MIMAT0009273	GAGGGUUGGGCGGAGGCUUUCC	26.89	26.847	0.03	26.87	1.18	0.4404	26.615	26.612	0	26.61	1	0.5005				1.13642	0.1845	0.00707
92		>oar-miR-376d MIMAT0019281	AUCAUAGAGGAAAAUCCACAU	28.133	28.193	0.04	28.16	2.48	0.1796	31.148	30.983	0.12	31.07	5.45	0.0229				0.127361	-2.973	0.00091
92		>bta-miR-2467-5p MIMAT0012056	ACCCCAAGCCUGGCUGCUACCU	27.027	26.943	0.06	26.99	1.3	0.4063	25.998	26.147	0.11	26.07	0.46	0.7282				1.79253	0.842001	0.00867
92		>bta-miR-6120-5p MIMAT0024590	CUGUUCCCGUUUUUCACAUGUG	35.076	35.398	0.23	35.24	9.55	0.0013	35.094	35.109	0.01	35.1	9.49	0.0014				1.04608	0.0649977	0.48901
92		>bta-miR-2363 MIMAT0011901	UCAACUUGGUCAAGGAAUAUUU	34.058	33.997	0.04	34.03	8.34	0.0031	33.052	33.396	0.24	33.22	7.61	0.0051				1.66209	0.733001	0.04416
92		>bta-miR-2284m MIMAT0011976	GAAAAGUUUGUUCGGGUUUU	35.64	35.435	0.14	35.54	9.85	0.0011	34.873	35.361	0.35	35.12	9.5	0.0014				1.27456	0.349999	0.25303
92		18s		25.648	25.723	0.05	25.69	0	1	25.638	25.592	0.03	25.61	0	1				1	0	0.2502
93		>bta-miR-769 MIMAT0009376	UGAGACCUCCGGGUUCUGAGCU	29.186	29.411	0.16	29.3	3.85	0.0691	31.448	31.537	0.06	31.49	6.03	0.0153				0.221826	-2.1725	0.00303
93		>bta-miR-631 MIMAT0009357	AGACCUGGCUUAGACCUCAGC	38.157	Undetermined	#DIV/0!	38.16	12.71	0.0001	33.525	33.729	0.14	33.63	8.16	0.0035				23.4498	4.5515	#DIV/0!
93		>bta-miR-193a MIMAT0013837	GGGACUUUGUAGGCCAGUU	36.258	35.917	0.24	36.09	10.64	0.0006	33.751	33.491	0.18	33.62	8.16	0.0035				5.61	2.488	0.00747
93		>bta-miR-1584-5p MIMAT0011969	UUGGGGCUGGGCUGGGGGCA	26.686	26.731	0.03	26.71	1.26	0.4162	25.073	24.99	0.06	25.03	-0.43	1.351				3.24564	1.6985	0.00079
93		>oar-miR-181a MIMAT0014973	AACAUUCAACGCUGUCGGUGAGU	21.648	21.635	0.01	21.64	-3.8	13.953	21.061	21.12	0.04	21.09	-4.38	20.7494				1.4871	0.5725	0.00299
93		>bta-miR-199c MIMAT0011871	UACAGUAGUCUGCACAUUGG	23.136	23.189	0.04	23.16	-2.28	4.8618	20.22	20.33	0.08	20.27	-5.19	36.5171				7.51098	2.909	0.00045
93		>oar-miR-148a MIMAT0030033	UCAGUGCACUACAGAACUUUGU	19.182	19.242	0.04	19.21	-6.23	75.1656	20.993	21.151	0.11	21.07	-4.39	21.0172				0.279613	-1.8385	0.00206
93		18s		25.413	25.475	0.04	25.44	0	1	25.495	25.436	0.04	25.47	0	1				1	0	0.66523
94		>bta-miR-142-5p MIMAT0003790	CAUAAAGUAGAAAGCACUAC	24.985	25.062	0.05	25.02	-0.77	1.7017	24.485	24.537	0.04	24.51	-1.06	2.0792				1.22179	0.288999	0.00812
94		>bta-miR-2464-5p MIMAT0012051	ACUUCUGCUGCAGACCUGGAAGAC	31.832	31.783	0.03	31.81	6.02	0.0154	29.702	29.826	0.09	29.76	4.2	0.0545				3.53081	1.82	0.00106
94		>bta-miR-2452 MIMAT0012033	GUGCUGUUUGUUUUCCUUUUUU	33.39	33.784	0.28	33.59	7.8	0.0045	31.961	31.721	0.17	31.84	6.27	0.0129				2.87288	1.5225	0.01701
94		>bta-miR-374b MIMAT0009302	AUAUAAUACAACCUGCUAAGUG	24.513	24.489	0.02	24.5	-1.29	2.4444	22.532	22.575	0.03	22.55	-3.01	8.0752				3.30351	1.724	0.00016
94		>oar-miR-369-5p MIMAT0019331	AGAUCGACCGUGUUAUAUUCG	28.805	28.826	0.01	28.82	3.02	0.1229	28.329	28.313	0.01	28.32	2.75	0.1482				1.20664	0.270999	0.00071
94		>oar-miR-1197-3p MIMAT0019258	UAGGACACAUGGUCUACUUCU	32.889	32.678	0.15	32.78	6.99	0.0079	32.317	32.747	0.3	32.53	6.97	0.008				1.0196	0.027998	0.40383
94		>bta-miR-2320-5p MIMAT0011844	UGGCACAGGGUCCAGCUGUCGGC	30.776	30.672	0.07	30.72	4.93	0.0327	29.166	29.272	0.07	29.22	3.65	0.0795				2.43091	1.2815	0.00243
94		18s		25.731	25.85	0.08	25.79	0	1	25.577	25.557	0.01	25.57	0	1				1	0	0.06577
95		>bta-miR-940 MIMAT0009386	AAGGCUGGGCCCCCGCUCCGC	29.5323	30.2854	0.53	29.91	-0.48	1.3957	27.3784	28.6055	0.87	27.99	-1.54	2.9074				2.08306	1.05871	0.11682
95		>bta-miR-1777a MIMAT0012032	UGGGGGCGGUGGGGGGCGGG	24.9601	27.434	1.75	26.2	-4.19	18.2884	23.8868	25.9181	1.44	24.9	-4.63	24.7472				1.35316	0.436337	0.50351
95		>bta-miR-193a-3p MIMAT0003795	AACUGGCCUACAAAGUCCCAGU	27.2263	29.1951	1.39	28.21	-2.18	4.529	26.9729	27.9592	0.7	27.47	-2.07	4.1862				0.924301	-0.113565	0.56854
95		>bta-miR-6517 MIMAT0025528	UCAGGGUCCGUGAGCUCCUCGGC	28.7268	29.3341	0.43	29.03	-1.36	2.5659	29.6876	29.9437	0.18	29.82	0.28	0.8213				0.320088	-1.64346	0.14004
95		>oar-miR-3958-5p MIMAT0019275	AGGUUGUCCGUGAUGUAUUUGC	34.9128	35.816	0.64	35.36	4.97	0.0318	34.6278	34.2979	0.23	34.46	4.93	0.0328				1.03044	0.0432539	0.20162
95		>bta-miR-2332 MIMAT0011865	CGGUUUAAGGUCUUGGAGACAAAG	32.7098	32.9329	0.16	32.82	2.43	0.1854	31.8064	32.1579	0.25	31.98	2.45	0.1829				0.9869	-0.0190248	0.05636
95		>oar-miR-10a MIMAT0030030	UACCCUGUAGAUCCGAAUUUG	25.9536	26.0845	0.09	26.02	-4.37	20.6901	25.2638	25.3774	0.08	25.32	-4.21	18.5205				0.895141	-0.159814	0.01504
95		18s		30.4148	30.3651	0.04	30.39	0	1	29.4013	29.662	0.18	29.53	0	1				1	0	0.02309
96		>bta-miR-2384 MIMAT0011933	AACUGUACUGGAAGGAUGGAUGG	28.342	28.767	0.3	28.55	2.92	0.132	28.488	28.517	0.02	28.5	3.04	0.1212				0.917957	-0.123501	0.82989
96		>oar-miR-668-3p MIMAT0019311	AUGUCACUCGGCCCACUACCC	27.115	27.298	0.13	27.21	1.57	0.3361	27.416	27.297	0.08	27.36	1.9	0.2682				0.798021	-0.3255	0.30308
96		>bta-miR-2357 MIMAT0011894	UUGGUCUGGCACAGAGCAUGUGAG	31.213	31.022	0.14	31.12	5.48	0.0223	30.273	30.085	0.13	30.18	4.72	0.0379				1.69702	0.763	0.01978
96		>bta-miR-7862 MIMAT0030442	UGGUGCUCCCUGGAGCUGAGC	30.089	29.963	0.09	30.03	4.39	0.0476	28.457	28.478	0.01	28.47	3.01	0.1242				2.6081	1.383	0.00168
96		>bta-miR-21-3p MIMAT0003745	AACAGCAGUCGAUGGGCUGUCU	30.346	30.322	0.02	30.33	4.7	0.0385	28.358	28.291	0.05	28.32	2.87	0.1371				3.56524	1.834	0.00031
96		>bta-miR-2898 MIMAT0013856	UGGUGGAGAUGCCGGGGA	28.201	28.098	0.07	28.15	2.52	0.1748	27.868	27.919	0.04	27.89	2.44	0.1849				1.05738	0.0804996	0.04688
96		>bta-miR-2894 MIMAT0013852	AGCCCUGGCCCUGCCAUCGUG	26.355	26.014	0.24	26.18	0.55	0.6825	23.49	23.502	0.01	23.5	-1.96	3.896				5.70806	2.513	0.004
96		18s		25.612	25.655	0.03	25.63	0	1	25.419	25.497	0.06	25.46	0	1				1	0	0.05877
97		>bta-let-7g MIMAT0003838	UGAGGUAGUAGUUUGUACAGUU	20.294	20.411	0.08	20.35	-5.54	46.4305	18.974	19.008	0.02	18.99	-6.7	104.293				2.24622	1.1675	0.002
97		>bta-miR-2322-5p MIMAT0011850	AAGAAAGCGAAGUCCAUCCUCAU	34.501	34.647	0.1	34.57	8.68	0.0024	32.463	32.439	0.02	32.45	6.76	0.0093				3.80791	1.929	0.00121
97		>bta-miR-677 MIMAT0012003	CUCACUGAUGAGCAGCUUCUGAC	25.459	25.447	0.01	25.45	-0.44	1.3533	25.216	25.251	0.02	25.23	-0.46	1.3774				1.01783	0.0254993	0.00703
97		>bta-miR-378b MIMAT0025535	ACUUGACUUGGAGUCAGAAGGC	26.258	26.683	0.3	26.47	0.58	0.6685	26.945	27.119	0.12	27.03	1.34	0.396				0.592341	-0.755501	0.13434
97		>bta-miR-2412 MIMAT0011974	UUGGGGCUGGGUGGGGAGAGGG	22.738	22.775	0.03	22.76	-3.13	8.7726	21.932	21.947	0.01	21.94	-3.76	13.5104				1.54007	0.622999	0.0006
97		>bta-miR-2437 MIMAT0012011	UGUGGUUUUUUGUUUUCCUUU	30.686	30.807	0.09	30.75	4.86	0.0345	26.729	26.707	0.02	26.72	1.02	0.4923				14.2659	3.8345	0.00023
97		>bta-miR-1281 MIMAT0009962	UCGCCUCCUCCUCUCCC	23.932	24.048	0.08	23.99	-1.9	3.7308	25.991	26.035	0.03	26.01	0.32	0.8025				0.215088	-2.217	0.00094
97		18s		25.815	25.964	0.11	25.89	0	1	25.661	25.73	0.05	25.7	0	1				1	0	0.14194
98		>oar-miR-433-5p MIMAT0019241	UACGGUGAGCCUGUCAUUGUUCA	31.922	31.838	0.06	31.88	6.01	0.0155	30.567	30.509	0.04	30.54	4.87	0.0341				2.19466	1.134	0.00144
98		>oar-miR-191 MIMAT0030038	CAACGGAAUCCCAAAAGCAGCU	23.291	23.241	0.04	23.27	-2.61	6.086	21.68	21.773	0.07	21.73	-3.94	15.3163				2.51664	1.3315	0.00117
98		>bta-miR-32 MIMAT0009283	UAUUGCACAUGACUAAGUUGCAU	30.44	30.584	0.1	30.51	4.64	0.0401	31.208	31.18	0.02	31.19	5.53	0.0216				0.539614	-0.89	0.01137
98		>bta-miR-2376 MIMAT0011922	CCUCUGAGAUCUUGCUAGGCGCU	33.469	33.326	0.1	33.4	7.53	0.0054	32.63	32.33	0.21	32.48	6.82	0.0089				1.63524	0.709499	0.03127
98		>bta-miR-2311 MIMAT0011826	UACUGAAACUGUGCUCGUGGUGU	27.587	27.581	0	27.58	1.71	0.3051	26.444	26.653	0.15	26.55	0.89	0.5415				1.77461	0.827499	0.01004
98		>bta-miR-151-3p MIMAT0003524	CUAGACUGAAGCUCCUUGAGG	24.805	24.856	0.04	24.83	-1.04	2.0577	23.718	23.692	0.02	23.7	-1.96	3.8866				1.88884	0.9175	0.00065
98		>bta-miR-490 MIMAT0009331	CAACCUGGAGGACUCCAUGCUG	32.093	32.148	0.04	32.12	6.25	0.0131	30.152	30.193	0.03	30.17	4.51	0.0439				3.34035	1.74	0.00031
98		18s		25.885	25.858	0.02	25.87	0	1	25.647	25.68	0.02	25.66	0	1				1	0	0.01034
99		>bta-miR-2470 MIMAT0012060	UUGUGUGGUUUUGGAUGUCUG	33.909	34.027	0.08	33.97	8.03	0.0038	32.038	32.201	0.12	32.12	6.47	0.0113				2.96391	1.5675	0.00295
99		>oar-miR-495-3p MIMAT0019274	AAACAAACAUGGUGCACUUCUU	27.822	27.789	0.02	27.81	1.87	0.2735	27.663	27.554	0.08	27.61	1.95	0.258				0.943438	-0.0840006	0.07435
99		>oar-miR-134-3p MIMAT0019309	UCUGGGCUGCCUCGUCACCAACC	30.981	31.057	0.05	31.02	5.08	0.0295	30.59	30.548	0.03	30.57	4.92	0.0331				1.12428	0.169	0.00918
99		>bta-miR-2284a MIMAT0011906	AAAAGUUCGUUGGGGUUUUU	31.923	32.11	0.13	32.02	6.08	0.0148	31.757	31.348	0.29	31.55	5.9	0.0168				1.13524	0.183001	0.17513
99		>bta-miR-2367-3p MIMAT0011910	UUGAAAGGCACUUACAGGAAG	37.507	38.336	0.59	37.92	11.99	0.0002	34.411	34.459	0.03	34.43	8.78	0.0023				9.22469	3.2055	0.01389
99		>bta-miR-2285h MIMAT0024583	GAAAACCGAAACGAACUUUAUG	34.394	34.572	0.13	34.48	8.55	0.0027	33.328	33.838	0.36	33.58	7.93	0.0041				1.53581	0.618999	0.07947
99		>bta-miR-2891 MIMAT0013849	AUCUUUGGGCUAGGUUAGUU	36.639	35.327	0.93	35.98	10.05	0.0009	34.275	34.074	0.14	34.17	8.52	0.0027				2.88285	1.5275	0.11241
99		18s		25.91	25.96	0.04	25.93	0	1	25.713	25.595	0.08	25.65	0	1				1	0	0.04827
100		>bta-miR-2448-5p MIMAT0012025	CUGCGGAUACAACCAAACACGG	33.667	34.249	0.41	33.96	7.96	0.004	33.272	33.063	0.15	33.17	7.72	0.0047				1.18263	0.242001	0.12495
100		>bta-miR-2354 MIMAT0011890	UAGUAGGUUGUGUUGUUUAGU	29.224	29.309	0.06	29.27	3.27	0.1035	27.072	26.956	0.08	27.01	1.57	0.3372				3.25803	1.704	0.00102
100		>bta-miR-223 MIMAT0009270	UGUCAGUUUGUCAAAUACCCCA	25.337	25.349	0.01	25.34	-0.65	1.5703	22.878	22.959	0.06	22.92	-2.53	5.7637				3.67056	1.876	0.00029
100		>oar-miR-374a MIMAT0030062	UUAUAAUACAACCUGAUAAGUG	25.103	24.995	0.08	25.05	-0.94	1.9252	22.919	23.253	0.24	23.09	-2.36	5.1319				2.66567	1.4145	0.0079
100		>bta-miR-2348 MIMAT0011883	UUCGGGUGGUGUGGAGCGGCC	32.242	32.388	0.1	32.32	6.32	0.0125	30.814	30.92	0.07	30.87	5.42	0.0233				1.86542	0.899501	0.00386
100		>bta-miR-192 MIMAT0003820	CUGACCUAUGAAUUGACAGCCAG	27.341	27.335	0	27.34	1.34	0.3939	25.864	25.802	0.04	25.83	0.39	0.7645				1.9406	0.956499	0.00043
100		>oar-miR-665-3p MIMAT0019240	ACCAGUAGGCCGAGGCCCCUCA	27.732	27.781	0.03	27.76	1.76	0.2947	27.442	27.405	0.03	27.42	1.98	0.2538				0.861248	-0.2155	0.00839
100		18s		25.964	26.024	0.04	25.99	0	1	25.41	25.481	0.05	25.45	0	1				1	0	0.0071
101		>bta-miR-1296 MIMAT0009964	UUAGGGCCCUGGCUCCAUCUCC	28.989	29.031	0.03	29.01	2.84	0.1395	27.792	27.891	0.07	27.84	2.26	0.2081				1.49226	0.577499	0.00211
101		>bta-miR-2368-5p MIMAT0011911	AGAGGGUGGCCUGGUAUCUG	31.089	31.001	0.06	31.05	4.88	0.034	27.482	27.503	0.01	27.49	1.92	0.2651				7.78933	2.9615	0.00016
101		>bta-miR-2284t-5p MIMAT0011831	GAAACAUUCACUCGGGUUUUU	35.094	35.353	0.18	35.22	9.06	0.0019	34.992	35.31	0.22	35.15	9.57	0.0013				0.698097	-0.5185	0.75747
101		>oar-miR-127 MIMAT0001415	AUCGGAUCCGUCUGAGCUUGGCU	25.228	25.412	0.13	25.32	-0.85	1.8	25.074	25.088	0.01	25.08	-0.5	1.4103				0.783498	-0.351999	0.12229
101		>oar-miR-10b MIMAT0030031	ACCCUGUAGAACCGAAUUUGUG	23.125	23.196	0.05	23.16	-3.01	8.0417	21.28	21.328	0.03	21.3	-4.27	19.3331				2.4041	1.2655	0.00053
101		>bta-miR-6528 MIMAT0025562	AGAGGGAAGAGGGAAGGAGG	26.177	26.248	0.05	26.21	0.04	0.9696	24.906	24.873	0.02	24.89	-0.69	1.6105				1.66094	0.731999	0.00087
101		>bta-miR-2485 MIMAT0012079	UUUCUAGAAUCUGCAGGUAGU	34.565	34.583	0.01	34.57	8.41	0.0029	34.036	34.297	0.18	34.17	8.59	0.0026				0.880563	-0.183501	0.08944
101		18s		26.194	26.142	0.04	26.17	0	1	25.574	25.58	0	25.58	0	1				1	0	0.00196
102		>bta-miR-2293 MIMAT0011801	UGAUUUUGUUGUUUUGUAUU	36.826	36.536	0.21	36.68	10.44	0.0007	34.595	34.743	0.1	34.67	9.06	0.0019				2.6081	1.383	0.00648
102		>bta-miR-6523b MIMAT0029951	CUGCUCAAAGUUACCCCAG	36.388	35.86	0.37	36.12	9.89	0.0011	34.865	35.257	0.28	35.06	9.45	0.0014				1.35097	0.434	0.08382
102		>bta-miR-197 MIMAT0009257	UUCACCACCUUCUCCACCCAGC	28.709	28.773	0.05	28.74	2.5	0.1765	27.09	27.015	0.05	27.05	1.44	0.3679				2.08421	1.0595	0.00085
102		>bta-miR-2409 MIMAT0011967	UCUCACAUGGACGCUGCCCU	33.423	33.645	0.16	33.53	7.3	0.0064	31.84	32.188	0.25	32.01	6.4	0.0118				1.85446	0.891001	0.01794
102		>bta-miR-2886 MIMAT0013844	AGCGCCGCCGGCCGCACC	24.524	24.656	0.09	24.59	-1.65	3.1362	24.761	24.857	0.07	24.81	-0.8	1.7423				0.555555	-0.848	0.11533
102		>bta-miR-562 MIMAT0009349	AAAGCAGCUGUACCAUUUAC	31.248	31.287	0.03	31.27	5.03	0.0306	29.461	29.63	0.12	29.55	3.94	0.0654				2.13317	1.093	0.00253
102		>oar-miR-329a-5p MIMAT0019265	GAGGUUUUCUAGGUCUCCGUUU	36.873	39.455	1.83	38.16	11.93	0.0003	35.855	35.565	0.21	35.71	10.1	0.0009				3.54308	1.825	0.19949
102		18s		26.243	26.235	0.01	26.24	0	1	25.561	25.659	0.07	25.61	0	1				1	0	0.00605
103		>oar-miR-370-5p MIMAT0019243	CAGGUCACGUCUCUGCAGUUAC	33.854	33.97	0.08	33.91	6.72	0.0095	Undetermined	Undetermined	#DIV/0!	#DIV/0!	#DIV/0!	#DIV/0!				#DIV/0!	#DIV/0!	#DIV/0!
103		>bta-miR-654 MIMAT0009359	UAUGUCUGCUGACCAUCACCUU	34.592	34.85	0.18	34.72	7.52	0.0054	Undetermined	Undetermined	#DIV/0!	#DIV/0!	#DIV/0!	#DIV/0!				#DIV/0!	#DIV/0!	#DIV/0!
103		>bta-miR-125b MIMAT0003539	UCCCUGAGACCCUAACUUGUGA	21.82	21.836	0.01	21.83	-5.37	41.3123	37.242	36.357	0.63	36.8	-0.13	1.097				0.0265527	-5.235	0.00087
103		>bta-miR-1603 MIMAT0011823	GUGGUUUGUUUUGUGUUUUU	35.913	34.875	0.73	35.39	8.2	0.0034	Undetermined	Undetermined	#DIV/0!	#DIV/0!	#DIV/0!	#DIV/0!				#DIV/0!	#DIV/0!	#DIV/0!
103		>bta-miR-126-5p MIMAT0004328	CAUUAUUACUUUUGGUACGCG	23.304	23.321	0.01	23.31	-3.88	14.7639	Undetermined	Undetermined	#DIV/0!	#DIV/0!	#DIV/0!	#DIV/0!				#DIV/0!	#DIV/0!	#DIV/0!
103		>bta-miR-2352 MIMAT0011888	AAACUGAAAGAACAGGAUUGCUG	36.245	37.111	0.61	36.68	9.48	0.0014	Undetermined	Undetermined	#DIV/0!	#DIV/0!	#DIV/0!	#DIV/0!				#DIV/0!	#DIV/0!	#DIV/0!
103		>bta-miR-130b MIMAT0009224	CAGUGCAAUGAUGAAAGGGCAU	29.074	29.326	0.18	29.2	2	0.2494	39.643	Undetermined	#DIV/0!	39.64	2.71	0.1528				0.612805	-0.706501	#DIV/0!
103		18s		27.036	27.357	0.23	27.2	0	1	37.925	35.941	1.4	36.93	0	1				1	0	0.01048
104		>bta-miR-483 MIMAT0009327	UCACUCCUCUCCUCCCGUCUU	25.7726	25.5132	0.18	25.64	0.87	0.5459	32.1677	32.5251	0.25	32.35	0.66	0.6342				1.16164	0.216167	0.00108
104		>bta-miR-2284x MIMAT0017395	UGAAAAGUUCGUUCGGGUUUU	29.357	28.7495	0.43	29.05	4.28	0.0513	35.5407	36.1754	0.45	35.86	4.17	0.0556				1.0829	0.114902	0.00414
104		>bta-miR-365-5p MIMAT0012539	AGGGACUUUUGGGGGCAGAUGUG	28.7158	28.8479	0.09	28.78	4.01	0.062	34.3337	34.4552	0.09	34.39	2.71	0.1534				2.47443	1.3071	0.00026
104		>oar-miR-99a MIMAT0030064	AACCCGUAGAUCCGAUCUUG	20.2502	Undetermined	#DIV/0!	20.25	-4.52	22.9357	24.3352	24.1867	0.11	24.26	-7.43	172.261				7.51062	2.90893	#DIV/0!
104		>bta-miR-2284d MIMAT0011836	AAAAAGUUCGUUAGGGUUUUUC	31.0138	30.8547	0.11	30.93	6.16	0.0139	39.6934	39.7018	0.01	39.7	8.01	0.0039				0.278611	-1.84368	8e-05
104		>bta-miR-885 MIMAT0009382	UCCAUUACACUACCCUGCCUCU	23.232	23.3879	0.11	23.31	-1.46	2.7507	32.2332	32.2803	0.03	32.26	0.57	0.6748				0.245333	-2.02719	8e-05
104		>bta-miR-182 MIMAT0009244	UUUGGCAAUGGUAGAACUCACACU	26.5212	26.4937	0.02	26.51	1.74	0.2998	30.1665	29.9423	0.16	30.05	-1.63	3.1058				10.358	3.37267	0.00101
104		18s		24.7643	24.7751	0.01	24.77	0	1	31.4164	31.9624	0.39	31.69	0	1				1	0	0.00155
105		>oar-miR-541-3p MIMAT0019324	UGGUGGGCACAGAAUCCGGCCUCU	27.7939	27.9272	0.09	27.86	3.88	0.0679	28.3842	28.6667	0.2	28.53	3.88	0.0677				0.997934	-0.00298405	0.051
105		>bta-miR-3120 MIMAT0024572	CACAGCAAGUGUAGACAGGCA	22.8791	22.888	0.01	22.88	-1.1	2.1378	23.1996	23.3297	0.09	23.26	-1.38	2.5971				1.21483	0.280756	0.02802
105		>bta-miR-2407 MIMAT0011965	CUGGGCGGAUGGGAAGGGCUGG	30.3238	30.9776	0.46	30.65	6.67	0.0098	29.6006	27.7374	1.32	28.67	4.03	0.0613				6.24894	2.64361	0.18252
105		>bta-miR-760-5p MIMAT0009372	CCCCUCAGUCCACCAGAGCCCG	28.4873	28.5389	0.04	28.51	4.53	0.0432	28.627	26.9734	1.17	27.8	3.16	0.112				2.59343	1.37486	0.47957
105		>bta-miR-324 MIMAT0009285	CGCAUCCCCUAGGGCAUUGGUGU	25.0151	24.8503	0.12	24.93	0.95	0.5166	23.9238	24.1506	0.16	24.04	-0.6	1.5203				2.94322	1.55739	0.02363
105		>oar-miR-433-3p MIMAT0019242	AUCAUGAUGGGCUCCUCGGUGU	26.7102	27.943	0.87	27.33	3.35	0.0983	27.8429	27.8763	0.02	27.86	3.22	0.1075				1.09347	0.128917	0.47847
105		>bta-miR-2890 MIMAT0013848	GCCCCGGCCGCUCCCGGCCU	24.4504	23.5559	0.63	24	0.02	0.9838	25.2654	25.4937	0.16	25.38	0.74	0.5996				0.609435	-0.714457	0.09647
105		18s		24.0686	23.8907	0.13	23.98	0	1	24.5982	24.6849	0.06	24.64	0	1				1	0	0.02163
106		>oar-let-7d MIMAT0030023	AGAGGUAGUAGGUUGCAUAG	22.2297	22.1868	0.03	22.21	-3.11	8.6364	20.8706	22.3265	1.03	21.6	-2.5	5.6657				0.656028	-0.608171	0.49058
106		>bta-miR-3957 MIMAT0025548	CUCGGAGAGUGCAGCUGUGG	31.5327	30.7509	0.55	31.14	5.82	0.0177	31.548	30.8489	0.49	31.2	7.1	0.0073				0.413356	-1.27454	0.92382
106		>bta-miR-103 MIMAT0003521	AGCAGCAUUGUACAGGGCUAUGA	18.4099	18.1942	0.15	18.3	-7.02	129.482	18.5355	18.6399	0.07	18.59	-5.51	45.6672				0.352692	-1.50352	0.13998
106		>bta-miR-592 MIMAT0009353	AUUGUGUCAAUAUGCGAUGAUGU	32.5469	32.8713	0.23	32.71	7.39	0.006	29.0816	29.6757	0.42	29.38	5.28	0.0258				4.32451	2.11254	0.01017
106		>bta-miR-2284h-5p MIMAT0012019	CCCAAAAGUUCGUUCGGGUUU	34.7145	33.7153	0.71	34.21	8.9	0.0021	33.5547	33.7971	0.17	33.68	9.58	0.0013				0.624626	-0.678935	0.40449
106		>oar-miR-26b MIMAT0030052	UUCAAGUAAUUCAGGAUAGGU	20.9749	21.491	0.36	21.23	-4.09	16.9792	19.9412	20.3464	0.29	20.14	-3.96	15.5298				0.914637	-0.128729	0.08
106		>bta-miR-423-5p MIMAT0012537	UGAGGGGCAGAGAGCGAGACUUU	21.5637	21.563	0	21.56	-3.76	13.5041	21.7278	20.7625	0.68	21.25	-2.86	7.2384				0.536016	-0.899652	0.57745
106		18s		25.1971	25.4402	0.17	25.32	0	1	23.9852	24.2164	0.16	24.1	0	1				1	0	0.01845
107		>oar-miR-323a-5p MIMAT0019259	AGGUGGUCCGUGGCGCGUUCG	23.5553	23.4418	0.08	23.5	-0.85	1.8086	22.7931	23.0233	0.16	22.91	-1	1.9955				1.10329	0.141815	0.04417
107		>bta-miR-2401 MIMAT0011958	AGAGCUUGUGUCUAGGGCUG	36.3456	36.5504	0.14	36.45	12.09	0.0002	34.4121	33.7882	0.44	34.1	10.2	0.0009				3.73051	1.89937	0.019
107		>bta-miR-146a MIMAT0009236	UGAGAACUGAAUUCCAUAGGUUGU	20.8748	20.7982	0.05	20.84	-3.52	11.4473	21.4173	21.6365	0.16	21.53	-2.38	5.1981				0.454095	-1.13894	0.02715
107		>bta-miR-2359 MIMAT0011897	GAUUGUGUUGUUUUCUUUUU	32.7201	31.6659	0.75	32.19	7.84	0.0044	30.593	30.4995	0.07	30.55	6.64	0.01				2.29448	1.19816	0.0896
107		>bta-miR-2284p MIMAT0011885	UGAAAGUUUGUUCGGGAUUUU	35.7951	34.4219	0.97	35.11	10.76	0.0006	34.8385	34.9534	0.08	34.9	10.99	0.0005				0.849061	-0.236059	0.78693
107		>bta-miR-708 MIMAT0009367	AAGGAGCUUACAAUCUAGCUGGG	25.7745	25.9858	0.15	25.88	1.53	0.3471	23.573	23.5889	0.01	23.58	-0.32	1.2517				3.6066	1.85064	0.00212
107		>oar-let-7f MIMAT0030024	UGAGGUAGUAGAUUGUAUAGU	18.7998	18.8242	0.02	18.81	-5.54	46.5744	17.5014	16.9267	0.41	17.21	-6.69	103.309				2.21815	1.14936	0.03091
107		18s		24.3361	24.3708	0.02	24.35	0	1	23.9397	23.8701	0.05	23.9	0	1				1	0	0.00745
108		>bta-miR-2390 MIMAT0011943	GUUGUGUGUUUUUGUUUUCC	33.7401	33.32	0.3	33.53	9.94	0.001	32.6956	32.215	0.34	32.46	8.78	0.0023				2.23807	1.16225	0.078
108		>oar-miR-487b-3p MIMAT0019295	AAUCGUACAGGGUCAUCCACUU	24.4062	24.6438	0.17	24.52	0.94	0.5226	24.6191	24.5078	0.08	24.56	0.89	0.5407				1.03456	0.0490122	0.7968
108		>oar-miR-410-3p MIMAT0019334	AAUAUAACACAGAUGGCCUGU	28.066	28.2346	0.12	28.15	4.56	0.0423	29.1826	28.798	0.27	28.99	5.31	0.0251				0.593579	-0.752488	0.05716
108		>bta-miR-2319a MIMAT0011842	CUACUCUGUAUUAGGCACUUAG	39.2211	39.3035	0.06	39.26	15.67	0	34.7597	33.0056	1.24	33.88	10.21	0.0008				44.2365	5.46716	0.02562
108		>oar-miR-29b MIMAT0030054	UAGCACCAUUUGAAAUCAGUGU	18.5407	18.3114	0.16	18.43	-5.16	35.8209	17.2955	17.3892	0.07	17.34	-6.33	80.6693				2.25202	1.17122	0.01281
108		>oar-miR-496-3p MIMAT0019320	UGAGUAUUACAUGGCCAAUCU	31.4229	30.1899	0.87	30.81	7.22	0.0067	32.9664	32.7157	0.18	32.84	9.16	0.0017				0.259325	-1.94717	0.08377
108		>bta-miR-2425-5p MIMAT0011994	CCAGGGCACGGAUCCAUGAACU	29.9559	30.5766	0.44	30.27	6.68	0.0098	29.6992	30.5557	0.61	30.13	6.45	0.0114				1.16984	0.226315	0.81754
108		18s		23.4151	23.7624	0.25	23.59	0	1	23.4575	23.8951	0.31	23.68	0	1				1	0	0.78373
109		>oar-miR-136 MIMAT0001417	ACUCCAUUUGUUUUGAUGAUGGA	21.6973	21.9007	0.14	21.8	-10.1	1100.82	24.2656	24.3469	0.06	24.31	-3.29	9.7858				0.00888956	-6.81367	0.0019
109		>bta-miR-2295 MIMAT0011803	UCGGGGUGGGAGGAAGGUUCU	25.9597	26.3975	0.31	26.18	-5.72	52.8833	26.5206	26.323	0.14	26.42	-1.18	2.2581				0.0426989	-4.54966	0.41778
109		>bta-miR-2375 MIMAT0011921	CCCAGUGAUGGAGAGGUCUGAUC	30.8523	31.3856	0.38	31.12	-0.78	1.7224	30.3923	30.3339	0.04	30.36	2.77	0.147				0.0853421	-3.5506	0.10623
109		>oar-miR-103 MIMAT0030027	AGCAGCAUUGUACAGGGCUAUG	17.5418	17.52	0.02	17.53	-14.37	21210	18.7056	18.7227	0.01	18.71	-8.88	472.031				0.0222551	-5.48972	0.00014
109		>bta-miR-2284c MIMAT0011926	AAAAAGUUCGUUUUGGUUUU	31.141	31.5461	0.29	31.34	-0.56	1.4741	32.5704	31.2996	0.9	31.93	4.34	0.0494				0.0335421	-4.89788	0.46873
109		>bta-miR-2435 MIMAT0012007	AAACUCGAAUGAACUCUUUGGC	32.8781	32.4242	0.32	32.65	0.75	0.5955	33.4467	32.2732	0.83	32.86	5.26	0.026				0.0437307	-4.51521	0.77155
109		>bta-miR-151-5p MIMAT0003523	UCGAGGAGCUCACAGUCUAGU	20.0379	19.9869	0.04	20.01	-11.89	3797.8	19.5241	19.8753	0.25	19.7	-7.9	238.398				0.0627727	-3.99372	0.22001
109		18s		31.5807	32.2261	0.46	31.9	0	1	27.2348	27.959	0.51	27.6	0	1				1	0	0.01245
110		>bta-miR-339b MIMAT0012038	UCCCUGUCCUCCAGGAGCUC	20.698	20.866	0.12	20.78	-13.83	14557.8	19.958	20.119	0.11	20.04	-12.38	5317.38				0.365261	-1.453	0.02362
110		>bta-miR-146b MIMAT0009235	UGAGAACUGAAUUCCAUAGGCUGU	21.202	21.592	0.28	21.4	-13.21	9505.19	21.692	21.702	0.01	21.7	-10.72	1684.38				0.177206	-2.4965	0.2639
110		>bta-miR-6525 MIMAT0025554	CUGGGGAAAGCAGGAGUGAG	28.841	28.482	0.25	28.66	-5.95	61.8199	27.076	27.003	0.05	27.04	-5.38	41.5133				0.671519	-0.574499	0.01251
110		>bta-miR-2432 MIMAT0012004	UCAGGAUUCUAGGCUUAGAGGU	33.4	32.849	0.39	33.12	-1.49	2.8031	31.414	31.825	0.29	31.62	-0.8	1.7357				0.61921	-0.691499	0.0484
110		>bta-miR-200a MIMAT0003822	UAACACUGUCUGGUAACGAUGUU	18.77	19.376	0.43	19.07	-15.54	47594.3	19	19.151	0.11	19.08	-13.34	10365.5				0.217789	-2.199	0.99434
110		>bta-miR-2319b MIMAT0011843	UACUCUGUAUUAGGCACUUAG	37.758	37.659	0.07	37.71	3.1	0.1169	36.177	36.764	0.42	36.47	4.06	0.0601				0.514592	-0.958498	0.05323
110		>bta-miR-210 MIMAT0003824	ACUGUGCGUGUGACAGCGGCUGA	25.729	25.871	0.1	25.8	-8.81	449.289	23.532	23.645	0.08	23.59	-8.83	453.985				1.01045	0.0150013	0.00168
110		18s		34.856	34.367	0.35	34.61	0	1	32.262	32.568	0.22	32.42	0	1				1	0	0.01681
111		>bta-miR-96 MIMAT0009388	UUUGGCACUAGCACAUUUUUGCU	26.395	26.322	0.05	26.36	0.96	0.5137	23.096	23.232	0.1	23.16	-1.82	3.5198				6.85188	2.7765	0.00058
111		>bta-miR-2424 MIMAT0011993	AGAUCUUUGGUAAUCUGAUGGCU	24.783	24.89	0.08	24.84	-0.56	1.4753	22.717	22.803	0.06	22.76	-2.22	4.6573				3.15688	1.6585	0.00109
111		>bta-miR-3600 MIMAT0016932	ACAGUUCUUCAACUGGCAGCUU	Undetermined	39.815	#DIV/0!	39.81	14.42	0	36.415	35.945	0.33	36.18	11.2	0.0004				9.2985	3.217	#DIV/0!
111		>oar-let-7b MIMAT0014963	UGAGGUAGUAGGUUGUGUGGU	16.497	16.386	0.08	16.44	-8.96	496.621	15.1	14.943	0.11	15.02	-9.96	994.619				2.00277	1.002	0.00455
111		>oar-let-7a MIMAT0030022	UGAGGUAGUAGGUUGUAUAGUU	16.219	16.364	0.1	16.29	-9.11	551.035	15.111	15.167	0.04	15.14	-9.84	916.823				1.66382	0.7345	0.00452
111		>bta-miR-2365 MIMAT0011903	AGUUUUUGCUGUUUCUUAUC	33.848	33.607	0.17	33.73	8.33	0.0031	32.549	32.523	0.02	32.54	7.56	0.0053				1.70941	0.773499	0.01019
111		>bta-miR-139 MIMAT0003788	UCUACAGUGCACGUGUCUCCAGU	24.336	24.22	0.08	24.28	-1.12	2.1727	23.613	23.76	0.1	23.69	-1.29	2.4504				1.12779	0.173499	0.02415
111		18s		25.31	25.485	0.12	25.4	0	1	24.947	25.012	0.05	24.98	0	1				1	0	0.04642
112		>bta-miR-2368-3p MIMAT0011912	ACUGUCAGACCACCUCUGCC	26.628	26.65	0.02	26.64	1.26	0.4173	25.905	26.116	0.15	26.01	0.94	0.522				1.25093	0.323	0.02732
112		>oar-miR-3957-5p MIMAT0019325	CUCGGAGAGUGGAGCUGUGGGUGU	31.187	31.028	0.11	31.11	5.73	0.0188	29.733	29.89	0.11	29.81	4.74	0.0374				1.98687	0.9905	0.00735
112		>oar-miR-1185-5p MIMAT0019288	AGAGGAUACCCUUUGUAUGUUC	27.439	27.776	0.24	27.61	2.23	0.2132	28.781	27.967	0.58	28.37	3.3	0.1014				0.475659	-1.072	0.22398
112		>bta-miR-2398 MIMAT0011953	AUCUAGGGACGCGUCGGCAACU	28.652	28.564	0.06	28.61	3.23	0.1066	26.452	26.597	0.1	26.52	1.45	0.3655				3.4295	1.778	0.00165
112		>bta-miR-2446 MIMAT0012023	UAAAAUAUAUUUGAAAUCGGGCC	32.873	33.1	0.16	32.99	7.61	0.0051	31.304	32.164	0.61	31.73	6.66	0.0099				1.92786	0.946999	0.10634
112		>bta-miR-370 MIMAT0009300	GCCUGCUGGGGUGGAACCUGGU	22.092	21.999	0.07	22.05	-3.33	10.0736	22.53	22.805	0.19	22.67	-2.4	5.2964				0.525768	-0.927501	0.05038
112		>bta-miR-2367-5p MIMAT0011909	ACCCUGUAACUCAGCCAUCAGAG	23.609	25.216	1.14	24.41	-0.97	1.9527	24.944	25.621	0.48	25.28	0.21	0.8645				0.44273	-1.1755	0.42349
112		18s		25.218	25.538	0.23	25.38	0	1	24.915	25.23	0.22	25.07	0	1				1	0	0.30665
113		>bta-miR-362-3p MIMAT0012548	AACACACCUAUUCAAGGAUUC	25.592	25.651	0.04	25.62	0.11	0.9269	24.731	25.236	0.36	24.98	0.22	0.8589				0.926587	-0.110002	0.1288
113		>bta-miR-568 MIMAT0009350	AUGUAUAAAUGUAUACACAC	35.655	36.763	0.78	36.21	10.7	0.0006	34.342	33.574	0.54	33.96	9.19	0.0017				2.83431	1.503	0.07917
113		>bta-miR-2423 MIMAT0011992	UUGUGUGGUUGUUGUUUUCCU	33.326	32.381	0.67	32.85	7.34	0.0062	31.574	33.115	1.09	32.34	7.58	0.0052				0.847332	-0.239	0.63004
113		>bta-miR-152 MIMAT0009238	UCAGUGCAUGACAGAACUUGGG	24.087	23.967	0.08	24.03	-1.49	2.7992	21.746	22.769	0.72	22.26	-2.51	5.6824				2.03003	1.0215	0.07527
113		18s		25.44	25.584	0.1	25.51	0	1	24.719	24.809	0.06	24.76	0	1				1	0	0.01264

## Sheet:  Supplementary 2
				sample: NC						sample:2.5ug/ml Prolactin Treatment						fold change		fold change
所属分组		mature name	mature sequence	CT值1	CT值2	SD	AVG	△CT	2^-△CT	CT值1	CT值2	SD	AVG	△CT	2^-△CT
1	bta-miR-125b MIMAT0003539			20.582	20.592	0.00706988	20.587	-4.7305	26.5474	20.328	20.411	0.05869	20.3695	-4.8825	29.4971	1.11111	0.105851	1.11111
1	bta-miR-181a MIMAT0003543			30.164	30.258	0.0664679	30.211	4.8935	0.0336442	28.683	28.767	0.0593967	28.725	3.473	0.0900581	2.67678	0.0021421	2.67678
1	bta-miR-149-3p MIMAT0024571			26.532	26.624	0.0650545	26.578	1.2605	0.417399	25.928	25.897	0.0219204	25.9125	0.6605	0.632659	1.51572	0.058665	1.51572
1	bta-miR-2881 MIMAT0013839			26.791	26.807	0.0113129	26.807	1.4895	0.356136	26.286	26.311	0.0176787	26.311	1.059	0.479964	1.3477	0.00572541	1.3477
1	bta-miR-365-3p MIMAT0004341			22.612	22.618	0.00424301	22.615	-2.7025	6.50929	21.753	21.677	0.0537403	21.715	-3.537	11.6076	1.78324	0.0289818	1.78324
1	oar-miR-27a MIMAT0030053			20.02	20.023	0.0021215	20.0215	-5.296	39.2875	19.015	19.045	0.0212137	19.03	-6.222	74.6464	1.9	0.00866764	1.9
1	bta-miR-2374 MIMAT0011920			30.084	30.286	0.142835	30.185	4.8675	0.034256	30.152	30.244	0.0650532	30.198	4.946	0.0324418	0.947042	0.852234	-1.05592
1	18S			25.293	25.342	0.0346481	25.3175	0	1	25.276	25.228	0.03394	25.252	0	1
2	oar-let-7c MIMAT0014964			22.379	22.374	0.00353494	22.3765	-3.1855	9.09768	22.271	22.223	0.0339414	22.247	-3.309	9.91079	1.08938	0.104741	1.08938
2	oar-miR-3955-5p MIMAT0019245			33.351	33.136	0.152028	33.2435	7.6815	0.00487122	32.972	32.81	0.11455	32.891	7.335	0.00619362	1.27147	0.0477706	1.27147
2	bta-miR-2340 MIMAT0011875			24.497	24.75	0.178898	24.6235	-0.938499	1.91653	26.333	26.554	0.156271	26.4435	0.887501	0.54055	0.282045	0.00559644	-3.54553
2	bta-miR-29d-3p MIMAT0009275			21.196	21.158	0.0268688	21.177	-4.385	20.8937	20.982	20.957	0.0176774	20.9695	-4.5865	24.0256	1.14989	0.0199337	1.14989
2	bta-miR-2466-5p MIMAT0012054			24.38	24.17	0.148492	24.275	-1.287	2.4402	24.498	24.53	0.0226285	24.514	-1.042	2.05908	0.843816	0.298356	-1.18509
2	bta-miR-142-5p MIMAT0003790			34.456	34.116	0.240416	34.286	8.724	0.00236491	35.732	34.304	1.00975	35.018	9.462	0.00141793	0.599571	0.406873	-1.66786
2	bta-miR-15a MIMAT0004334			20.583	20.538	0.0318199	20.5605	-5.0015	32.0333	20.029	19.974	0.0388897	20.0015	-5.5545	46.9971	1.46713	0.00569317	1.46713
2	18S			25.505	25.619	0.0806104	25.562	0	1	25.532	25.58	0.0339414	25.556	0	1
3	bta-miR-200a MIMAT0003822			22.226	22.134	0.0650532	22.18	-3.1375	8.79997	21.723	21.861	0.0975811	21.792	-3.7405	13.366	1.51887	0.183437	1.51887
3	bta-miR-204 MIMAT0004338			16.764	16.757	0.00494973	16.7605	-8.557	376.629	16.793	17	0.146372	16.8965	-8.636	397.828	1.05629	0.424384	1.05629
3	bta-miR-2382-5p MIMAT0011930			25.158	25.172	0.00989945	25.165	-0.152498	1.11149	26.319	26.278	0.0289916	26.2985	0.766001	0.588045	0.529059	0.0154422	-1.89015
3	bta-let-7f MIMAT0003519			21.098	21.516	0.295571	21.307	-4.0105	16.1169	20.914	20.745	0.1195	20.8295	-4.703	26.0462	1.61608	0.35086	1.61608
3	bta-miR-146a MIMAT0009236			33.429	32.998	0.304763	33.2135	7.896	0.00419823	32.613	32.453	0.113137	32.533	7.0005	0.00780979	1.86026	0.125126	1.86026
3	bta-miR-7864 MIMAT0030449			36.29	35.868	0.2984	36.079	10.7615	0.000576057	36.971	36.178	0.560735	36.5745	11.042	0.000474271	0.823305	0.228047	-1.21462
3	bta-miR-190b MIMAT0009252			31.806	31.842	0.0254553	31.824	6.5065	0.0109989	31.297	31.099	0.140007	31.198	5.6655	0.0197022	1.79129	0.117628	1.79129
3	18S			25.293	25.342	0.0346481	25.3175	0	1	25.553	25.512	0.0289916	25.5325	0	1
4	bta-miR-128 MIMAT0003541			26.574	26.571	0.0021215	26.5725	0.734499	0.601027	26.376	26.426	0.0353561	26.401	0.444	0.735094	1.22306	0.0976009	1.22306
4	bta-miR-208a MIMAT0009261			32.537	32.246	0.205768	32.3915	6.5535	0.0106463	31.851	32.655	0.568513	32.253	6.296	0.0127267	1.1954	0.842265	1.1954
4	bta-miR-2378 MIMAT0011924			32.432	32.885	0.320319	32.6585	6.8205	0.0088476	33.808	33.756	#DIV/0!	33.782	7.825	0.00441002	0.498442	0.140737	-2.00625
4	bta-miR-502b MIMAT0009339			30.531	30.422	0.0770741	30.422	4.584	0.0416945	30.252	30.392	0.0989945	30.392	4.435	0.0462308	1.1088	0.431807	1.1088
4	bta-miR-199b MIMAT0003821			35.565	35.897	0.23476	35.731	9.893	0.00105175	34.35	35.205	0.604579	34.7775	8.8205	0.0022119	2.10307	0.170406	2.10307
4	bta-miR-146b MIMAT0009235			33.878	33.384	0.34931	33.631	7.793	0.00450893	33.106	32.993	0.0799023	33.0495	7.0925	0.00732731	1.62507	0.201543	1.62507
4	bta-miR-499 MIMAT0003536			29.959	29.976	0.012021	29.9675	4.1295	0.0571343	29.508	29.53	0.0155572	29.519	3.562	0.0846703	1.48195	0.00354933	1.48195
4	18S			25.756	25.92	0.115965	25.838	0	1	25.952	25.962	0.00707123	25.957	0	1
5	bta-miR-3154 MIMAT0025529			24.254	24.286	0.0226271	24.27	-1.3625	2.5713	24.024	24.026	0.00141344	24.025	-1.756	3.3776	1.31358	0.038929	1.31358
5	bta-miR-2375 MIMAT0011921			31.094	31.262	0.118793	31.178	5.5455	0.0214111	31.931	31.99	0.0417193	31.9605	6.1795	0.013797	0.644387	0.0442678	-1.55186
5	oar-miR-370-3p MIMAT0019244			24.021	24.055	0.0240419	24.038	-1.5945	3.0199	23.707	23.91	0.143542	23.8085	-1.9725	3.92448	1.29954	0.224591	1.29954
5	oar-miR-136 MIMAT0001417			32.252	32.431	0.126573	32.3415	6.709	0.0095585	32.416	32.386	0.0212123	32.401	6.62	0.0101667	1.06363	0.670478	1.06363
5	bta-miR-2435 MIMAT0012007			34.45	34.267	0.129402	34.3585	8.726	0.00236163	33.053	33.462	0.289207	33.2575	7.4765	0.00561499	2.37759	0.167201	2.37759
5	bta-miR-2295 MIMAT0011803			30.289	30.242	0.0332333	30.2655	4.633	0.0403021	30.393	30.347	0.0325266	30.37	4.589	0.0415502	1.03097	0.00304434	1.03097
5	bta-miR-2284c MIMAT0011926			32.006	32.386	0.268701	32.196	6.5635	0.0105728	32.992	32.677	0.22274	32.8345	7.0535	0.0075281	0.712026	0.317302	-1.40444
5	18S			25.598	25.667	0.0487905	25.6325	0	1	25.716	25.846	0.0919246	25.781	0	1
6	bta-miR-151-5p MIMAT0003523			29.897	29.882	0.0106062	29.8895	4.257	0.0523016	30.121	30.248	0.0898018	30.1845	4.4035	0.0472514	0.90344	0.150359	-1.10688
6	oar-miR-103 MIMAT0030027			33.728	33.809	0.0572739	33.7685	8.136	0.00355484	35.264	34.971	0.207182	35.1175	9.3365	0.0015468	0.435124	0.0876894	-2.29819
6	bta-miR-125a MIMAT0003538			25.985	25.94	0.0318199	25.9625	0.330001	0.795536	25.409	25.46	0.0360615	25.4345	-0.3465	1.27147	1.59826	0.057715	1.59826
6	bta-miR-141 MIMAT0009232			22.528	22.493	0.0247486	22.5105	-3.122	8.70594	22.028	22.016	0.00848467	22.022	-3.759	13.5385	1.55509	0.0149847	1.55509
6	bta-miR-100 MIMAT0009215			24.488	24.469	0.0134357	24.4785	-1.154	2.2253	24.647	24.264	0.270821	24.4555	-1.3255	2.5062	1.12623	0.919969	1.12623
6	oar-miR-99a MIMAT0030064			24.77	24.668	0.0721257	24.719	-0.9135	1.88361	24.832	24.445	0.273651	24.6385	-1.1425	2.20763	1.17202	0.672638	1.17202
6	bta-miR-339b MIMAT0012038			25.359	25.319	0.0282836	25.339	-0.2935	1.22561	25.315	25.166	0.105359	25.2405	-0.5405	1.45448	1.18674	0.321735	1.18674
6	18S			25.598	25.667	0.0487905	25.6325	0	1	25.716	25.846	0.0919246	25.781	0	1
7	bta-miR-155 MIMAT0009241			27.546	27.583	0.0261634	27.5645	2.207	0.216584	28.231	28.231	0	28.231	3.015	0.123707	0.571173	0.0176664	-1.75078
7	bta-miR-214 MIMAT0003825			31.404	31.462	0.0410126	31.433	6.0755	0.0148283	33.034	32.59	0.313956	32.812	7.596	0.00516864	0.348565	0.11462	-2.86891
7	bta-miR-181b MIMAT0003793			30.913	31.109	0.138592	31.011	5.6535	0.0198668	31.309	31.289	0.0141421	31.299	6.083	0.0147514	0.742519	0.2284	-1.34677
7	bta-miR-29a MIMAT0003518			21.043	21.082	0.0275782	21.0625	-4.295	19.6302	20.973	20.942	0.0219204	20.942	-4.274	19.3465	0.985549	0.204836	-1.01466
7	oar-miR-107 MIMAT0030029			24.596	24.659	0.0445475	24.6275	-0.73	1.65864	24.529	24.503	0.0183841	24.516	-0.7	1.6245	0.97942	0.241741	-1.02101
7	bta-miR-135a MIMAT0009228			33.797	33.575	0.156978	33.686	8.3285	0.0031108	34.985	34.293	0.489319	34.639	9.423	0.00145678	0.468299	0.153914	-2.13539
7	oar-miR-106b MIMAT0030028			24.129	24.173	0.0311131	24.151	-1.2065	2.30777	24.086	24.089	0.0021215	24.0875	-1.1285	2.18631	0.947369	0.198802	-1.05555
7	18s			25.323	25.392	0.0487905	25.3575	0	1	25.192	25.24	0.0339414	25.216	0	1
8	bta-miR-200c MIMAT0003823			22.029	22.057	0.0197989	22.043	-3.092	8.52677	22.256	22.29	0.0240419	22.273	-3.6735	12.7595	1.4964	0.00830393	1.4964
8	oar-miR-148a MIMAT0030033			26.387	26.38	0.00494973	26.3835	1.2485	0.420886	26.714	26.806	0.0650532	26.76	0.8135	0.569	1.35191	0.0832206	1.35191
8	bta-miR-148b MIMAT0003814			26.844	26.602	0.17112	26.723	1.588	0.332632	27.529	27.529	0	27.529	1.5825	0.333903	1.00382	0.0948638	1.00382
8	oar-miR-152 MIMAT0030035			25.863	26.185	0.227687	26.024	0.889001	0.539988	26.609	26.306	0.214253	26.4575	0.511	0.701736	1.29954	0.397632	1.29954
8	bta-miR-130b MIMAT0009224			25.545	27.312	1.24946	26.4285	1.2935	0.40796	25.789	25.899	0.0777822	25.844	-0.1025	1.07363	2.63171	0.608859	2.63171
8	bta-miR-30e-5p MIMAT0003799			25.217	25.223	0.00424301	25.22	0.085	0.942785	25.404	25.404	0	25.404	-0.5425	1.45649	1.54489	0.0103796	1.54489
8				Undetermined	Undetermined	#DIV/0!	#DIV/0!	#DIV/0!	#DIV/0!	Undetermined	Undetermined	#DIV/0!	#DIV/0!	#DIV/0!	#DIV/0!	#DIV/0!		#DIV/0!
8	18s			25.178	25.092	0.0608115	25.135	0	1	25.977	25.916	0.0431327	25.9465	0	1

## Sheet:  Supplementary 3
*Primer sequences(5'--3')	*The primer name
CCTTCACCACCGTTGACTTCT	F: PPARγ
GATACAGGCTCCACTTTGATTGC	R:PPARγ
AGGACACTTGCCACCTCATTC	F:LPL
TTGGAGTCTGGTTCCCTCTTGTA	R:LPL
GTACAGATGCAGCCTCATTTCC	F:CD36
TGGACCTGCAAATATCAGAGGA	R:CD36
CCACTGGGACCTGAGGTGTC	F:DGAT1
GCATCACCACACACCAATTCA	R:DGAT1
GGGAGCACTACAAACGCAACG	F:HSL
TGAATGATCCGCTCAAACTCG	R:HSL
CCATCGCCTGTGGAGTCAC	F:SCD1
GTCGGATAAATCTAGCGTAGCA	R:SCD1
GGGCTCCACCACCGTGTTCCA	F:FASN
GCTCTGCTGGGCCTGCAGCTG	R:FASN
CAGCTGGCCAAATACCTTCAA	F:UXT
CAGCTGGCCAAATACCTTCAA	R:UXT

## Sheet:  Supplementary 4
	sense（5'-3'）	antisense（5'-3'）
SiRNA-LRP6	GGAGCAUCGUCAAGUAGUUTT	AACUACUUGACGAUGCUCCTT
SiRNA-YAP1	GGAUGUGGAUACCACCCAATT	UUGGGUGGUAUCCACAUCCTT
SiRNA-Beta-catenin	GGCACACAGUGGAUAUUAUTT	AUAAUAUCCACUGUGUGCCTT

## Sheet:  Supplementary 5
*Primer sequences(5'--3')	*The primer name
ccgctcgagTTAACTCTTCCTGTTGACGA	LRP6-up
GAGACTAAGCTGAACTGCCTcgccggcgtataaa	LRP6-Down
AGAATTCTCGAGGGGGGGGTTTTTTAATG	LRP6-overlap
ccgctcgagGGGCAGTCTTCTGGCTAATA	YAP1-up
CATCATCCAAACAGGCTCACcgccggcgtataaa	YAP1-Down
TCTTGTCCATTTTTTTTGTTAATATATT	YAP1-overlap
